# Supplementary material for: Construction of immune-related and prognostic lncRNA clusters and identification of their immune and genomic alterations characteristics in lung adenocarcinoma samples
Source: Aging (Albany NY). 2020 May 23;12(10):9868–81. doi: 10.18632/aging.103251 (PMC7288974; doi:10.18632/aging.103251)
Supplement: Supplementary Table 1 [file aging-12-103251-s001..xlsx]

## Sheet: Sheet1
geneX	geneY	correlation	pvalue
CRABP1	ENSG00000279694	0.979606	0
LGR5	ENSG00000257761	0.955813	1.41102e-277
IL5RA	ENSG00000275678	0.914578	8.25466e-206
IL5RA	ENSG00000181123	0.913451	2.1153e-204
CRABP1	ENSG00000244040	0.912084	1.01955e-202
TNFRSF17	ENSG00000229228	0.885798	7.72906e-175
NFAT5	ENSG00000215386	0.879859	1.73229e-169
NFAT5	ENSG00000259804	0.869344	1.12154e-160
NFAT5	ENSG00000258515	0.868521	5.09536e-160
ANGPTL7	ENSG00000256862	0.866897	9.79219e-159
TRAJ38	ENSG00000215386	0.866478	2.0861e-158
ANGPTL7	ENSG00000103472	0.866293	2.91406e-158
RORA	ENSG00000260565	0.861166	2.4558e-154
NFAT5	ENSG00000260565	0.860424	8.80532e-154
MASP2	ENSG00000260565	0.855683	2.61738e-150
RORA	ENSG00000241490	0.855436	3.93585e-150
TRAJ44	ENSG00000215386	0.854843	1.04668e-149
TRAJ31	ENSG00000215386	0.85379	5.88026e-149
TRAJ16	ENSG00000215386	0.850216	1.86463e-146
IL5	ENSG00000215386	0.849711	4.15963e-146
IGKC	ENSG00000229228	0.848069	5.52317e-145
TRAJ39	ENSG00000215386	0.84346	6.68642e-142
RORA	ENSG00000256862	0.842998	1.34438e-141
MASP2	ENSG00000260966	0.841195	2.01372e-140
IL5RA	ENSG00000228723	0.840982	2.76487e-140
TRAJ6	ENSG00000215386	0.839483	2.54994e-139
TRAJ38	ENSG00000280265	0.838885	6.14462e-139
MASP2	ENSG00000279456	0.837788	3.05331e-138
GNRHR	ENSG00000267481	0.834585	3.08985e-136
ROBO2	ENSG00000255418	0.83401	7.00385e-136
TRAJ39	ENSG00000259804	0.833309	1.89044e-135
IL5RA	ENSG00000258752	0.833119	2.47485e-135
ANGPTL3	ENSG00000256862	0.830785	6.51022e-134
NFAT5	ENSG00000232160	0.83038	1.14264e-133
CD40LG	ENSG00000233093	0.830243	1.38018e-133
TRAJ6	ENSG00000259804	0.827891	3.50536e-132
NFAT5	ENSG00000280265	0.82706	1.08461e-131
TRAJ38	ENSG00000103472	0.826221	3.37836e-131
NFAT5	ENSG00000279456	0.825464	9.3649e-131
GNRHR	ENSG00000256862	0.824459	3.595e-130
ANGPTL7	ENSG00000260565	0.823181	1.96536e-129
RORA	ENSG00000215386	0.821796	1.22032e-128
TRAJ38	ENSG00000259804	0.821074	3.14033e-128
MASP2	ENSG00000272374	0.820454	7.04544e-128
TRAJ31	ENSG00000280265	0.820145	1.05366e-127
RORA	ENSG00000279456	0.819	4.63471e-127
ANGPTL7	ENSG00000267481	0.817988	1.70472e-126
TRAJ31	ENSG00000259804	0.817983	1.71444e-126
GNRH1	ENSG00000260565	0.817003	5.99615e-126
GNRHR	ENSG00000231119	0.816343	1.38876e-125
TRAJ16	ENSG00000280265	0.815786	2.80999e-125
TRAJ10	ENSG00000215386	0.815761	2.90302e-125
RORA	ENSG00000232160	0.815439	4.35514e-125
TRAJ39	ENSG00000228863	0.815094	6.73344e-125
RORA	ENSG00000103472	0.814622	1.219e-124
CRABP1	ENSG00000215483	0.81417	2.14714e-124
FAM19A3	ENSG00000245719	0.813139	7.78281e-124
GNRHR	ENSG00000103472	0.811973	3.30128e-123
NFAT5	ENSG00000249464	0.811899	3.61728e-123
TRAJ44	ENSG00000280265	0.811691	4.67969e-123
CD48	ENSG00000268001	0.809665	5.61439e-122
TRAJ10	ENSG00000259804	0.809184	1.00808e-121
IGKJ5	ENSG00000226777	0.808822	1.5636e-121
TRAJ39	ENSG00000280265	0.8078	5.38064e-121
MASP2	ENSG00000179818	0.807159	1.16377e-120
FAM19A2	ENSG00000267322	0.806817	1.75329e-120
TRAJ38	ENSG00000258473	0.804526	2.68367e-119
BRAF	ENSG00000272140	0.804372	3.21932e-119
TRAJ5	ENSG00000228863	0.803935	5.39328e-119
LTBP2	ENSG00000255399	0.803645	7.58837e-119
NFAT5	ENSG00000256862	0.80295	1.71644e-118
TRAJ16	ENSG00000259804	0.802314	3.61091e-118
TRAJ3	ENSG00000246084	0.802067	4.81984e-118
TRAJ17	ENSG00000215386	0.801913	5.7609e-118
TRAJ44	ENSG00000259804	0.801581	8.48266e-118
NFAT5	ENSG00000260495	0.800895	1.88097e-117
GNRHR	ENSG00000260565	0.799847	6.30658e-117
NFAT5	ENSG00000267481	0.79975	7.05453e-117
ESR2	ENSG00000272374	0.799659	7.8308e-117
TRAJ3	ENSG00000259804	0.799586	8.52165e-117
TG	ENSG00000244040	0.799268	1.22712e-116
TRAJ4	ENSG00000228863	0.799224	1.2909e-116
GNRH1	ENSG00000271870	0.79922	1.29713e-116
SH2D1A	ENSG00000281103	0.799206	1.31808e-116
CD19	ENSG00000247982	0.798935	1.79754e-116
TRAJ38	ENSG00000232160	0.7987	2.35212e-116
MSTN	ENSG00000254615	0.798457	3.10603e-116
CD247	ENSG00000281103	0.798283	3.78963e-116
BRAF	ENSG00000267481	0.798197	4.1783e-116
TRAJ44	ENSG00000249464	0.797622	8.04337e-116
TRAJ3	ENSG00000103472	0.797531	8.92194e-116
IL5	ENSG00000260565	0.79718	1.32872e-115
TRAJ4	ENSG00000103472	0.797043	1.55168e-115
HTR3E	ENSG00000254615	0.79679	2.06665e-115
GNRHR	ENSG00000264707	0.796146	4.27686e-115
TRAJ38	ENSG00000246084	0.796114	4.43472e-115
TRAJ12	ENSG00000215386	0.796079	4.61255e-115
ANGPTL7	ENSG00000179818	0.796025	4.90362e-115
TNFRSF13C	ENSG00000247982	0.795979	5.16666e-115
ANGPTL7	ENSG00000231119	0.795968	5.22724e-115
TRBC1	ENSG00000281103	0.79587	5.83759e-115
TNFRSF17	ENSG00000224220	0.794686	2.20462e-114
MSR1	ENSG00000251442	0.794412	2.99479e-114
IL5RA	ENSG00000278338	0.794271	3.50663e-114
TRAJ38	ENSG00000228863	0.794045	4.51033e-114
RORA	ENSG00000280265	0.793726	6.4339e-114
NFAT5	ENSG00000103472	0.79354	7.90868e-114
MASP2	ENSG00000244055	0.793004	1.4341e-113
TRAJ3	ENSG00000215386	0.792717	1.96927e-113
VIP	ENSG00000226252	0.792617	2.19931e-113
TRAJ39	ENSG00000267481	0.791505	7.49498e-113
TRAJ1	ENSG00000259804	0.791484	7.67179e-113
TRAJ38	ENSG00000256862	0.791292	9.47162e-113
TRAJ3	ENSG00000228863	0.791027	1.26712e-112
TRAJ38	ENSG00000267481	0.790876	1.4947e-112
TRAJ2	ENSG00000264707	0.790832	1.5682e-112
GNRH1	ENSG00000261460	0.789864	4.51377e-112
TRAJ31	ENSG00000258473	0.78902	1.12903e-111
GNRHR	ENSG00000258515	0.788709	1.58233e-111
TRAJ1	ENSG00000215386	0.788594	1.79029e-111
TRAJ38	ENSG00000258515	0.788514	1.95286e-111
ROBO2	ENSG00000268926	0.788432	2.13481e-111
GNRH1	ENSG00000179818	0.788178	2.80735e-111
TRAJ16	ENSG00000228863	0.788064	3.17469e-111
RORA	ENSG00000258515	0.787864	3.93975e-111
ANGPTL7	ENSG00000255389	0.787588	5.3009e-111
NFAT5	ENSG00000244055	0.787296	7.25402e-111
MASP2	ENSG00000272140	0.78619	2.372e-110
CD86	ENSG00000251442	0.785968	3.00487e-110
TRAJ39	ENSG00000103472	0.785908	3.20269e-110
NR2C2	ENSG00000272140	0.785894	3.25358e-110
GNRHR	ENSG00000179818	0.784988	8.52202e-110
FGR	ENSG00000224397	0.784946	8.91429e-110
TRAJ18	ENSG00000215386	0.784865	9.71173e-110
TRAJ2	ENSG00000215386	0.78475	1.09632e-109
CXCR6	ENSG00000281103	0.784091	2.20275e-109
TRAJ38	ENSG00000260565	0.784003	2.41738e-109
ANGPTL7	ENSG00000272374	0.783269	5.23171e-109
TRAJ17	ENSG00000228863	0.783221	5.5026e-109
TRAJ3	ENSG00000267481	0.783113	6.16939e-109
ANGPTL7	ENSG00000258515	0.782959	7.24828e-109
TRGV2	ENSG00000281103	0.782738	9.13746e-109
NR2C2	ENSG00000260565	0.782247	1.52723e-108
GNRHR	ENSG00000272374	0.782227	1.56001e-108
FABP2	ENSG00000236318	0.781602	2.99437e-108
TRAJ6	ENSG00000280265	0.781545	3.17818e-108
ANGPTL7	ENSG00000279456	0.780249	1.22022e-107
IL5	ENSG00000259804	0.779088	4.04172e-107
GNRHR	ENSG00000215386	0.778939	4.7076e-107
TRAJ16	ENSG00000103472	0.778884	4.98173e-107
PTGDR	ENSG00000246084	0.778858	5.11517e-107
TRAJ31	ENSG00000103472	0.778084	1.13099e-106
TRAJ5	ENSG00000215386	0.777926	1.32964e-106
RORA	ENSG00000273015	0.777587	1.87933e-106
FABP2	ENSG00000260774	0.777227	2.7107e-106
TRAJ39	ENSG00000258473	0.777177	2.85346e-106
GNRH1	ENSG00000272374	0.776797	4.20055e-106
ANGPTL7	ENSG00000228863	0.776623	5.01358e-106
NFAT5	ENSG00000273015	0.776535	5.47875e-106
GNRHR	ENSG00000232160	0.776493	5.7164e-106
FABP7	ENSG00000272841	0.776424	6.12972e-106
BRAF	ENSG00000272374	0.776404	6.2607e-106
TRAJ39	ENSG00000258515	0.776	9.41858e-106
GNRH1	ENSG00000259972	0.77583	1.11836e-105
TRAJ2	ENSG00000258515	0.775646	1.34758e-105
MASP2	ENSG00000267481	0.775544	1.49323e-105
CD3G	ENSG00000281103	0.775473	1.60393e-105
GNRH1	ENSG00000258515	0.775435	1.66671e-105
MASP2	ENSG00000261490	0.775318	1.87565e-105
TRAJ5	ENSG00000259804	0.774949	2.72135e-105
TRAJ31	ENSG00000228863	0.774782	3.21646e-105
TRAJ39	ENSG00000232160	0.774561	4.01818e-105
NR2C2	ENSG00000224660	0.774214	5.68923e-105
TRAJ4	ENSG00000258473	0.774037	6.7992e-105
GNRH1	ENSG00000260495	0.773609	1.04267e-104
TRAJ17	ENSG00000259804	0.773524	1.13513e-104
TRAJ31	ENSG00000267481	0.772914	2.08552e-104
GNRH1	ENSG00000267481	0.772513	3.10686e-104
MASP2	ENSG00000259972	0.77236	3.61847e-104
TRAJ6	ENSG00000258515	0.772323	3.75304e-104
AGER	ENSG00000228401	0.772255	4.01417e-104
TRAJ5	ENSG00000280265	0.772223	4.14391e-104
TRAJ6	ENSG00000103472	0.77214	4.50172e-104
ITK	ENSG00000246084	0.771694	7.0052e-104
TRAJ17	ENSG00000258473	0.771687	7.04839e-104
AGER	ENSG00000268388	0.771148	1.20052e-103
RORA	ENSG00000205056	0.771062	1.30683e-103
TRAJ39	ENSG00000256862	0.771038	1.33878e-103
TRAJ4	ENSG00000259804	0.770564	2.13497e-103
TRAJ1	ENSG00000246084	0.770504	2.26567e-103
VTN	ENSG00000260963	0.770394	2.52501e-103
GMFG	ENSG00000268001	0.769954	3.88747e-103
TRAJ3	ENSG00000264707	0.769925	4.0012e-103
TRAJ5	ENSG00000246084	0.769891	4.13677e-103
RORA	ENSG00000260495	0.769843	4.33268e-103
TRAJ3	ENSG00000258515	0.769827	4.40271e-103
IGLJ1	ENSG00000226777	0.769266	7.62253e-103
ANGPTL7	ENSG00000215386	0.769263	7.64846e-103
TRAJ10	ENSG00000280265	0.769112	8.86444e-103
TG	ENSG00000215483	0.7691	8.96769e-103
ANGPTL7	ENSG00000232160	0.769029	9.61101e-103
ANGPTL3	ENSG00000231119	0.768496	1.6161e-102
NR2C2	ENSG00000260966	0.767961	2.71979e-102
TRAJ4	ENSG00000246084	0.767827	3.09773e-102
NR2C2	ENSG00000267904	0.767511	4.20537e-102
MARCO	ENSG00000224397	0.766947	7.26048e-102
TRAJ39	ENSG00000246084	0.766897	7.62179e-102
TRAJ6	ENSG00000267481	0.76611	1.62737e-101
CD22	ENSG00000247982	0.765814	2.16146e-101
TRAJ31	ENSG00000232160	0.765801	2.18925e-101
FAM19A2	ENSG00000253298	0.765582	2.70116e-101
TRAJ4	ENSG00000215386	0.765396	3.22885e-101
BRAF	ENSG00000260565	0.765324	3.45821e-101
MASP2	ENSG00000224660	0.765298	3.54555e-101
TRAJ10	ENSG00000103472	0.765064	4.43959e-101
TEK	ENSG00000268505	0.764653	6.57481e-101
TRAJ1	ENSG00000228863	0.764383	8.5074e-101
TRAJ39	ENSG00000272374	0.76437	8.60952e-101
TRAJ31	ENSG00000260495	0.764179	1.03361e-100
IL5	ENSG00000232160	0.764167	1.0453e-100
ANGPTL1	ENSG00000103472	0.763857	1.40364e-100
BRAF	ENSG00000232160	0.763739	1.57041e-100
CCR5	ENSG00000281103	0.763485	2.00012e-100
TRAJ18	ENSG00000246084	0.762955	3.30537e-100
TRAJ38	ENSG00000260495	0.762757	3.98563e-100
RORA	ENSG00000259804	0.762662	4.36213e-100
TRAJ39	ENSG00000260565	0.762568	4.76691e-100
MASP2	ENSG00000260495	0.762406	5.55518e-100
MASP2	ENSG00000267904	0.762205	6.71366e-100
NR2C2	ENSG00000179818	0.761996	8.17948e-100
TRAJ5	ENSG00000258473	0.761947	8.56192e-100
GNRH1	ENSG00000272140	0.761428	1.39625e-99
ESR2	ENSG00000228863	0.761059	1.97293e-99
BRAF	ENSG00000278831	0.76081	2.49374e-99
TRAJ16	ENSG00000258473	0.760717	2.72015e-99
A2M	ENSG00000255399	0.760655	2.88217e-99
ESR2	ENSG00000260565	0.760404	3.64527e-99
TRAJ4	ENSG00000267481	0.760221	4.32547e-99
TRAJ6	ENSG00000246084	0.759962	5.51028e-99
TRAJ3	ENSG00000232160	0.75941	9.21508e-99
TRAJ6	ENSG00000228863	0.759127	1.19852e-98
TRAJ2	ENSG00000246084	0.759102	1.22751e-98
NR2C2	ENSG00000267481	0.758823	1.59028e-98
MASP2	ENSG00000258515	0.7588	1.6246e-98
TRAJ31	ENSG00000256862	0.758642	1.88033e-98
NR2C2	ENSG00000272374	0.758512	2.12044e-98
ITK	ENSG00000281103	0.758284	2.61989e-98
ESR2	ENSG00000179818	0.758188	2.86367e-98
TRAJ6	ENSG00000232160	0.758101	3.10416e-98
IL5	ENSG00000258473	0.757744	4.31366e-98
PTGDR	ENSG00000103472	0.757587	4.98826e-98
CREB1	ENSG00000267481	0.757566	5.08496e-98
DDX17	ENSG00000260565	0.75749	5.45747e-98
IL15	ENSG00000234883	0.757363	6.13502e-98
TRAJ2	ENSG00000103472	0.757247	6.82399e-98
TRAJ17	ENSG00000280265	0.756949	8.97724e-98
IL5RA	ENSG00000260372	0.756931	9.12441e-98
CREB1	ENSG00000279456	0.756704	1.12473e-97
OGN	ENSG00000237125	0.756395	1.49331e-97
TRAJ31	ENSG00000246084	0.756292	1.64059e-97
RORA	ENSG00000267481	0.755656	2.93713e-97
ANGPTL7	ENSG00000278831	0.75565	2.95354e-97
GNRHR	ENSG00000279456	0.755601	3.08767e-97
TRAJ38	ENSG00000179818	0.755553	3.22675e-97
TRAJ31	ENSG00000260565	0.754775	6.5594e-97
GNRH1	ENSG00000261490	0.754578	7.84673e-97
TRAJ31	ENSG00000258515	0.754577	7.84879e-97
FIGF	ENSG00000268505	0.754332	9.81115e-97
TRAJ39	ENSG00000260495	0.753994	1.33243e-96
LAT	ENSG00000265206	0.753795	1.59642e-96
JAK2	ENSG00000103472	0.753754	1.65647e-96
CRABP1	ENSG00000225826	0.753671	1.7856e-96
RORA	ENSG00000246084	0.75362	1.87e-96
ESR2	ENSG00000260495	0.753602	1.9009e-96
ESR2	ENSG00000279456	0.753489	2.10472e-96
TRAJ18	ENSG00000103472	0.753211	2.70613e-96
CREB1	ENSG00000256862	0.753172	2.80465e-96
TRAJ5	ENSG00000256862	0.753035	3.17288e-96
GNRH1	ENSG00000224660	0.752965	3.37999e-96
IL5	ENSG00000249464	0.752955	3.41101e-96
NFAT5	ENSG00000179818	0.752953	3.41742e-96
RORA	ENSG00000272374	0.752847	3.7576e-96
NFAT5	ENSG00000281501	0.752686	4.34628e-96
ESR2	ENSG00000267481	0.752671	4.40663e-96
MASP2	ENSG00000273015	0.752392	5.66108e-96
CD19	ENSG00000261218	0.752325	6.0134e-96
PTPRC	ENSG00000281103	0.752179	6.85541e-96
MASP2	ENSG00000255389	0.752081	7.48875e-96
TRAJ38	ENSG00000279456	0.75175	1.00806e-95
TNFRSF13B	ENSG00000247982	0.7516	1.15264e-95
TRAJ3	ENSG00000279456	0.751376	1.40968e-95
TRAJ18	ENSG00000259804	0.751306	1.49991e-95
ESR2	ENSG00000103472	0.751202	1.6463e-95
IL5	ENSG00000280265	0.751193	1.65972e-95
TRAJ3	ENSG00000258473	0.751159	1.7107e-95
TNFSF13B	ENSG00000268001	0.751157	1.71395e-95
TRGV4	ENSG00000281103	0.75105	1.88667e-95
NR2C2	ENSG00000279456	0.750951	2.06128e-95
ICOS	ENSG00000234883	0.750899	2.15905e-95
IL17RD	ENSG00000244040	0.75082	2.31639e-95
MSTN	ENSG00000245719	0.750648	2.7002e-95
TRAJ6	ENSG00000264707	0.750423	3.29982e-95
ESR2	ENSG00000241490	0.750309	3.65376e-95
HTR3E	ENSG00000245719	0.749431	7.97188e-95
BRAF	ENSG00000279434	0.749355	8.52924e-95
TRAJ5	ENSG00000103472	0.749056	1.11128e-94
TRAJ38	ENSG00000264707	0.748923	1.25002e-94
GNRH1	ENSG00000244055	0.748905	1.27017e-94
MASP2	ENSG00000259804	0.748873	1.30662e-94
BRAF	ENSG00000258515	0.74874	1.47065e-94
ANGPTL1	ENSG00000256862	0.748724	1.49152e-94
RORA	ENSG00000179818	0.748661	1.57701e-94
ITK	ENSG00000241490	0.748626	1.62573e-94
GNRH1	ENSG00000279456	0.748409	1.96882e-94
TRAJ18	ENSG00000280265	0.748317	2.13664e-94
TRAJ16	ENSG00000267481	0.748158	2.4571e-94
GNRHR	ENSG00000269985	0.748031	2.74915e-94
FCGR3A	ENSG00000251442	0.747761	3.48486e-94
IGLC3	ENSG00000229228	0.747614	3.96601e-94
TRAJ12	ENSG00000258473	0.747498	4.39318e-94
TRAJ1	ENSG00000280265	0.747407	4.76044e-94
TRAJ39	ENSG00000179818	0.747397	4.79973e-94
ESR2	ENSG00000261270	0.747128	6.08002e-94
IGLV6-57	ENSG00000229228	0.747079	6.34674e-94
ITK	ENSG00000205056	0.74706	6.45489e-94
ITK	ENSG00000234883	0.747017	6.70436e-94
TRAJ10	ENSG00000258515	0.746724	8.66067e-94
TRAJ16	ENSG00000258515	0.746689	8.93637e-94
NFAT5	ENSG00000272374	0.746658	9.17634e-94
ANGPTL7	ENSG00000259804	0.746623	9.46725e-94
TRAJ2	ENSG00000259804	0.746208	1.36043e-93
ALB	ENSG00000260963	0.746138	1.44628e-93
EDNRB	ENSG00000268388	0.745847	1.86466e-93
ICOS	ENSG00000235304	0.745619	2.27386e-93
GNRH1	ENSG00000268189	0.745568	2.37832e-93
NFAT5	ENSG00000272140	0.745442	2.65424e-93
NFAT5	ENSG00000259972	0.74515	3.42123e-93
ESR2	ENSG00000278831	0.744808	4.60211e-93
IL5	ENSG00000279456	0.744654	5.26296e-93
TRAJ3	ENSG00000260565	0.744192	7.84697e-93
TRAJ44	ENSG00000258515	0.744176	7.95865e-93
RORA	ENSG00000267904	0.744152	8.12382e-93
TRAJ12	ENSG00000259804	0.744074	8.69186e-93
KLRK1	ENSG00000281103	0.744003	9.24443e-93
VIP	ENSG00000268388	0.743721	1.17957e-92
IFNW1	ENSG00000260565	0.743438	1.50598e-92
NFAT5	ENSG00000264707	0.743418	1.53131e-92
ANGPTL3	ENSG00000103472	0.74323	1.80067e-92
HRG	ENSG00000260963	0.743194	1.85776e-92
IL10RA	ENSG00000281103	0.742999	2.19745e-92
TRAJ16	ENSG00000256862	0.742614	3.05919e-92
TRAJ38	ENSG00000272374	0.742567	3.18546e-92
TRAJ3	ENSG00000179818	0.742321	3.93361e-92
IL5	ENSG00000267481	0.742269	4.11433e-92
RORA	ENSG00000225473	0.742043	4.99563e-92
SH2D1A	ENSG00000235304	0.742016	5.11198e-92
CYLD	ENSG00000246084	0.741851	5.88844e-92
ANGPTL7	ENSG00000269985	0.741773	6.29045e-92
TRAJ38	ENSG00000231119	0.741686	6.78015e-92
TRAJ2	ENSG00000280265	0.741682	6.80141e-92
ESR2	ENSG00000272140	0.741626	7.13388e-92
FABP2	ENSG00000256862	0.74148	8.08604e-92
PPP3R2	ENSG00000260774	0.741219	1.01028e-91
GNRH1	ENSG00000273759	0.741115	1.1042e-91
RORA	ENSG00000278831	0.740954	1.26692e-91
TRAJ16	ENSG00000246084	0.74083	1.40805e-91
CD28	ENSG00000246084	0.740625	1.67654e-91
TRAJ44	ENSG00000260565	0.74017	2.46761e-91
ESR2	ENSG00000256862	0.740062	2.70494e-91
JAK2	ENSG00000246084	0.740049	2.73402e-91
AGER	ENSG00000268505	0.739987	2.88218e-91
IFNW1	ENSG00000215386	0.739678	3.74511e-91
CRH	ENSG00000260963	0.739446	4.55796e-91
ANGPTL7	ENSG00000228506	0.738977	6.77862e-91
TRAJ2	ENSG00000267481	0.738882	7.34591e-91
TRAJ16	ENSG00000232160	0.73874	8.27843e-91
MASP2	ENSG00000260331	0.738697	8.58581e-91
ANGPTL3	ENSG00000260565	0.738542	9.78689e-91
TRAJ17	ENSG00000103472	0.738375	1.12593e-90
IL18RAP	ENSG00000281103	0.737589	2.18131e-90
TRAJ39	ENSG00000279456	0.737544	2.26576e-90
TRAJ2	ENSG00000232160	0.737537	2.27869e-90
GNRH1	ENSG00000273015	0.737445	2.46123e-90
RORA	ENSG00000255389	0.737432	2.48924e-90
GNRHR	ENSG00000258473	0.736909	3.85722e-90
TRAJ10	ENSG00000246084	0.73655	5.20463e-90
MASP2	ENSG00000215386	0.735559	1.18886e-89
GNRH1	ENSG00000260966	0.73544	1.31297e-89
CREB1	ENSG00000232160	0.735229	1.56419e-89
TRAJ38	ENSG00000278831	0.735038	1.83232e-89
DEFB124	ENSG00000275734	0.734946	1.97781e-89
TRAJ1	ENSG00000267481	0.734883	2.08386e-89
ITGAL	ENSG00000281103	0.734697	2.43158e-89
IGLC2	ENSG00000229228	0.734253	3.51169e-89
NFAT5	ENSG00000231119	0.734215	3.6225e-89
IL5	ENSG00000103472	0.733886	4.75593e-89
ANGPTL7	ENSG00000273015	0.733729	5.41305e-89
TSHR	ENSG00000260070	0.733658	5.73982e-89
ANGPTL7	ENSG00000264707	0.733524	6.40696e-89
TRAJ3	ENSG00000280265	0.733335	7.48481e-89
GNRHR	ENSG00000259804	0.733291	7.76204e-89
ANGPTL7	ENSG00000280265	0.733281	7.82724e-89
GNRHR	ENSG00000280265	0.733177	8.52914e-89
PTPRC	ENSG00000234883	0.733061	9.38289e-89
TRAJ1	ENSG00000103472	0.732903	1.06795e-88
BMPR2	ENSG00000279456	0.732585	1.38715e-88
TRAJ5	ENSG00000267481	0.732521	1.46106e-88
TRAJ10	ENSG00000228863	0.732448	1.55113e-88
CD3E	ENSG00000281103	0.73236	1.66833e-88
TRAJ5	ENSG00000260495	0.732322	1.7204e-88
RORA	ENSG00000260966	0.732219	1.87258e-88
IGKV3-20	ENSG00000229228	0.732191	1.91463e-88
NFAT5	ENSG00000246084	0.73188	2.46965e-88
TRAJ10	ENSG00000267481	0.731495	3.38304e-88
TRAJ6	ENSG00000260565	0.731462	3.47695e-88
S1PR1	ENSG00000261269	0.731356	3.78917e-88
CREB1	ENSG00000215386	0.731197	4.31642e-88
RORA	ENSG00000228863	0.731162	4.4385e-88
ESR2	ENSG00000232160	0.731134	4.54112e-88
TRAJ4	ENSG00000256862	0.730813	5.89794e-88
GNRHR	ENSG00000228506	0.73081	5.91527e-88
DDX17	ENSG00000259972	0.730004	1.13831e-87
IL23R	ENSG00000215386	0.729993	1.14829e-87
TRAJ6	ENSG00000258473	0.729801	1.34209e-87
MASP2	ENSG00000246792	0.729686	1.47348e-87
IL23R	ENSG00000255310	0.729401	1.85477e-87
HLA-DMB	ENSG00000268001	0.729159	2.2553e-87
EDNRB	ENSG00000268505	0.729094	2.37704e-87
TRAJ5	ENSG00000260565	0.728875	2.83603e-87
FIGF	ENSG00000268388	0.728862	2.86611e-87
IGKJ5	ENSG00000229228	0.728793	3.03179e-87
TRAJ44	ENSG00000232160	0.728767	3.09545e-87
BRAF	ENSG00000279456	0.728718	3.21893e-87
IGHV3-23	ENSG00000229228	0.728705	3.25525e-87
RORA	ENSG00000272140	0.728503	3.82888e-87
TRAJ17	ENSG00000246084	0.728359	4.30019e-87
TRAJ12	ENSG00000280265	0.728251	4.69198e-87
ANGPTL7	ENSG00000244055	0.728162	5.03936e-87
GNRH1	ENSG00000259804	0.727987	5.7981e-87
BRAF	ENSG00000103472	0.727358	9.60502e-87
CREB1	ENSG00000103472	0.727341	9.74264e-87
TRAJ1	ENSG00000258515	0.726718	1.60375e-86
IL5	ENSG00000281501	0.726491	1.92172e-86
TRAJ16	ENSG00000179818	0.725982	2.88509e-86
TRAJ44	ENSG00000103472	0.725841	3.22619e-86
CREB1	ENSG00000260565	0.725449	4.40635e-86
FASLG	ENSG00000281103	0.725404	4.56803e-86
TRAJ3	ENSG00000272374	0.725268	5.0895e-86
ANGPTL7	ENSG00000260495	0.725	6.29514e-86
ACVRL1	ENSG00000268505	0.724925	6.68044e-86
NR2C2	ENSG00000244055	0.724898	6.82336e-86
TRAJ16	ENSG00000260565	0.724771	7.54961e-86
ESR2	ENSG00000279434	0.724766	7.57548e-86
MASP2	ENSG00000232160	0.724747	7.69362e-86
LCP2	ENSG00000281103	0.724342	1.06015e-85
TRAJ17	ENSG00000267481	0.724304	1.09275e-85
TRAJ16	ENSG00000264707	0.724287	1.10709e-85
NFAT5	ENSG00000255310	0.724273	1.11953e-85
GNRH1	ENSG00000255389	0.724198	1.18789e-85
ANGPTL7	ENSG00000203446	0.724064	1.32038e-85
TRAJ6	ENSG00000279456	0.723998	1.39103e-85
TRAJ6	ENSG00000260495	0.723706	1.75152e-85
TRAJ38	ENSG00000244055	0.7237	1.76033e-85
TMSB15A	ENSG00000245719	0.723485	2.0853e-85
TRAJ5	ENSG00000272374	0.72343	2.17683e-85
TRAJ39	ENSG00000264707	0.723351	2.3172e-85
IFNW1	ENSG00000259804	0.723163	2.68693e-85
TRAJ3	ENSG00000260495	0.72307	2.88951e-85
ANGPTL1	ENSG00000228863	0.722737	3.7534e-85
ANGPTL1	ENSG00000241490	0.722484	4.57848e-85
GNRHR	ENSG00000255389	0.722234	5.56869e-85
C8G	ENSG00000260963	0.722164	5.88396e-85
NFAT5	ENSG00000267904	0.721898	7.24653e-85
IFNW1	ENSG00000179818	0.721836	7.60634e-85
TRAJ10	ENSG00000232160	0.721804	7.79712e-85
ZAP70	ENSG00000281103	0.721247	1.20498e-84
SLC11A1	ENSG00000224397	0.721045	1.41016e-84
TRAJ38	ENSG00000273015	0.721013	1.44591e-84
IGKV4-1	ENSG00000229228	0.72089	1.59206e-84
VIP	ENSG00000238018	0.720789	1.7224e-84
TG	ENSG00000279694	0.720783	1.72973e-84
IL5	ENSG00000179818	0.720651	1.91737e-84
ESR2	ENSG00000253298	0.720602	1.99082e-84
NFAT5	ENSG00000260966	0.72059	2.01077e-84
NFAT5	ENSG00000278831	0.72058	2.02516e-84
MASP2	ENSG00000271870	0.720478	2.19268e-84
TRAJ31	ENSG00000279456	0.720329	2.46294e-84
IFNW1	ENSG00000279456	0.720087	2.97077e-84
LILRB3	ENSG00000224397	0.719839	3.60051e-84
TRAJ31	ENSG00000272374	0.719794	3.73005e-84
TEK	ENSG00000268388	0.719765	3.81373e-84
CBLB	ENSG00000256862	0.719736	3.89979e-84
ESR2	ENSG00000205056	0.719715	3.96567e-84
TRAJ5	ENSG00000232160	0.719606	4.3156e-84
DDX17	ENSG00000272140	0.719489	4.72465e-84
DDX17	ENSG00000179818	0.719486	4.73449e-84
BRAF	ENSG00000260495	0.719442	4.89649e-84
FIGF	ENSG00000246430	0.719378	5.14493e-84
TRAJ6	ENSG00000256862	0.718806	8.00493e-84
TRAJ12	ENSG00000246084	0.71876	8.29597e-84
DDX17	ENSG00000224660	0.718618	9.254e-84
TRAJ18	ENSG00000228863	0.718591	9.44985e-84
DDX17	ENSG00000272374	0.718361	1.1288e-83
HCST	ENSG00000237181	0.718248	1.23121e-83
GNRHR	ENSG00000261460	0.718113	1.36614e-83
ITGAL	ENSG00000242258	0.718107	1.37214e-83
TRAJ44	ENSG00000246084	0.718003	1.48638e-83
CREB1	ENSG00000267904	0.718001	1.489e-83
FCGR2B	ENSG00000251442	0.717999	1.49094e-83
BRAF	ENSG00000258473	0.71799	1.50124e-83
TRAJ16	ENSG00000279884	0.717846	1.67771e-83
GNRHR	ENSG00000278831	0.717799	1.73902e-83
TRBC1	ENSG00000235304	0.717735	1.8272e-83
TRAJ4	ENSG00000280265	0.71772	1.84719e-83
JAK2	ENSG00000234883	0.717663	1.93097e-83
DDX17	ENSG00000244055	0.717555	2.09737e-83
CD8A	ENSG00000281103	0.717408	2.3477e-83
TRAJ6	ENSG00000179818	0.717268	2.61331e-83
A2M	ENSG00000235997	0.716967	3.29195e-83
IGHG1	ENSG00000229228	0.716829	3.65839e-83
RORA	ENSG00000281501	0.716816	3.69367e-83
BTK	ENSG00000268001	0.716718	3.98378e-83
GNRHR	ENSG00000279434	0.716283	5.55183e-83
RXFP1	ENSG00000268505	0.716265	5.62797e-83
PTPRC	ENSG00000246084	0.71598	6.99855e-83
NR2C2	ENSG00000271870	0.715937	7.23177e-83
ANGPTL7	ENSG00000260966	0.71589	7.49551e-83
TRAJ10	ENSG00000260565	0.715712	8.5844e-83
TRAJ6	ENSG00000249464	0.715653	8.9744e-83
DDX17	ENSG00000261490	0.715593	9.3928e-83
TRAJ4	ENSG00000260565	0.71554	9.7837e-83
RORA	ENSG00000260686	0.715421	1.07111e-82
TRAJ38	ENSG00000228506	0.715417	1.07401e-82
TRAC	ENSG00000281103	0.715273	1.19876e-82
TRAJ44	ENSG00000279456	0.715034	1.43677e-82
GNRHR	ENSG00000244055	0.715032	1.43931e-82
ANGPTL7	ENSG00000258473	0.714775	1.74984e-82
ANGPTL7	ENSG00000261460	0.714716	1.82956e-82
RORA	ENSG00000234572	0.714667	1.89852e-82
TRAJ31	ENSG00000179818	0.714333	2.4454e-82
TRAJ10	ENSG00000258473	0.714291	2.52473e-82
TRBV28	ENSG00000281103	0.714262	2.57938e-82
ANGPTL1	ENSG00000278831	0.714034	3.06576e-82
PLCG2	ENSG00000261218	0.713966	3.22713e-82
TRAJ16	ENSG00000272374	0.713945	3.28005e-82
TRAJ16	ENSG00000249464	0.713928	3.32016e-82
ANGPTL7	ENSG00000272140	0.713587	4.29595e-82
TRAJ31	ENSG00000260331	0.713366	5.07759e-82
IFNG	ENSG00000281103	0.713242	5.57321e-82
JAK2	ENSG00000256862	0.712841	7.5354e-82
FAM19A2	ENSG00000246792	0.71283	7.60212e-82
RORA	ENSG00000228506	0.712812	7.70209e-82
RORA	ENSG00000249464	0.712781	7.88505e-82
IL5	ENSG00000258515	0.712712	8.3051e-82
TRBV28	ENSG00000235304	0.712584	9.14075e-82
TRAJ18	ENSG00000260565	0.712543	9.42972e-82
TRAJ5	ENSG00000258515	0.712525	9.55944e-82
TRAJ2	ENSG00000258473	0.712319	1.1159e-81
IL5	ENSG00000260495	0.71223	1.1925e-81
CD48	ENSG00000233093	0.712206	1.21471e-81
BRAF	ENSG00000260966	0.71192	1.50505e-81
ANGPTL3	ENSG00000267481	0.711875	1.55671e-81
MASP2	ENSG00000261460	0.711755	1.70286e-81
ANGPTL3	ENSG00000258515	0.711527	2.01951e-81
TRAJ4	ENSG00000179818	0.711333	2.3342e-81
CD40LG	ENSG00000245954	0.710969	3.0643e-81
TRAJ4	ENSG00000258515	0.710833	3.39021e-81
TRAJ38	ENSG00000249464	0.710723	3.68031e-81
TRAJ16	ENSG00000260495	0.71057	4.12536e-81
GNRHR	ENSG00000228863	0.710536	4.2312e-81
IGKV1-5	ENSG00000229228	0.710386	4.72889e-81
BRAF	ENSG00000241490	0.71038	4.75294e-81
GNRHR	ENSG00000260495	0.710275	5.13819e-81
TRAJ3	ENSG00000256862	0.710182	5.50408e-81
ESR2	ENSG00000258473	0.710146	5.65652e-81
ICOS	ENSG00000281103	0.710134	5.70589e-81
NFATC3	ENSG00000196167	0.710115	5.78654e-81
TRAJ1	ENSG00000258473	0.709935	6.6151e-81
GNRH1	ENSG00000256862	0.709841	7.09277e-81
BRAF	ENSG00000256862	0.709742	7.63309e-81
FGF14	ENSG00000215386	0.709738	7.65521e-81
CD244	ENSG00000281103	0.70954	8.86723e-81
SH2D1A	ENSG00000234883	0.709539	8.87751e-81
CYLD	ENSG00000279456	0.709481	9.26203e-81
IL5	ENSG00000246084	0.709474	9.31253e-81
NFAT5	ENSG00000255389	0.709414	9.7392e-81
PTGDR	ENSG00000281103	0.709405	9.80381e-81
TRAJ10	ENSG00000249464	0.709247	1.1016e-80
TRAJ6	ENSG00000231119	0.70922	1.12421e-80
CYLD	ENSG00000103472	0.709175	1.16267e-80
GNRH1	ENSG00000279434	0.709114	1.21618e-80
GNLY	ENSG00000260581	0.708962	1.36102e-80
ANGPTL7	ENSG00000279434	0.708782	1.55422e-80
TRAJ18	ENSG00000232160	0.708466	1.96291e-80
DDX17	ENSG00000279456	0.708083	2.60372e-80
RXFP1	ENSG00000268388	0.708004	2.75935e-80
IGLV1-44	ENSG00000229228	0.707887	3.00836e-80
CNTF	ENSG00000280780	0.707869	3.0494e-80
IL5RA	ENSG00000255036	0.707851	3.08939e-80
CREB1	ENSG00000228506	0.707703	3.44406e-80
ACVRL1	ENSG00000228401	0.707651	3.57823e-80
IL6ST	ENSG00000241490	0.707551	3.85269e-80
GNRHR	ENSG00000272140	0.707537	3.89347e-80
IL5	ENSG00000225473	0.707255	4.7888e-80
ITK	ENSG00000265148	0.707173	5.0875e-80
RORA	ENSG00000272341	0.707038	5.6143e-80
GNRH1	ENSG00000231119	0.706938	6.04142e-80
CIITA	ENSG00000265148	0.706839	6.49934e-80
RORA	ENSG00000244055	0.706831	6.53421e-80
ANGPTL3	ENSG00000255389	0.70667	7.35508e-80
C3AR1	ENSG00000251442	0.706486	8.41894e-80
IL5	ENSG00000260686	0.706468	8.52631e-80
GNRH1	ENSG00000103472	0.706425	8.8028e-80
ESR2	ENSG00000258515	0.70629	9.7135e-80
CRABP1	ENSG00000217455	0.706161	1.06748e-79
NFAT5	ENSG00000228863	0.706135	1.08831e-79
BMPR2	ENSG00000256862	0.70606	1.14945e-79
TRAJ31	ENSG00000231119	0.705957	1.2395e-79
TRAJ4	ENSG00000272374	0.705919	1.27417e-79
CREB1	ENSG00000273015	0.70555	1.66721e-79
FAM19A2	ENSG00000229236	0.705547	1.67088e-79
TRAJ39	ENSG00000249464	0.705112	2.29399e-79
ESR2	ENSG00000228506	0.704899	2.67856e-79
FAM3D	ENSG00000224259	0.70474	3.00668e-79
TRAJ31	ENSG00000273015	0.704667	3.17056e-79
TRAJ44	ENSG00000256862	0.704617	3.28874e-79
ANGPTL7	ENSG00000246084	0.704202	4.44505e-79
RORA	ENSG00000260331	0.704102	4.77906e-79
ANGPTL7	ENSG00000241490	0.704101	4.77989e-79
TRAJ39	ENSG00000231119	0.704064	4.91093e-79
NOX5	ENSG00000260581	0.704031	5.03048e-79
BRAF	ENSG00000272341	0.703951	5.3286e-79
TRAJ38	ENSG00000260331	0.703779	6.03625e-79
TRAJ4	ENSG00000232160	0.703758	6.12802e-79
CD79A	ENSG00000261218	0.703757	6.13525e-79
RORA	ENSG00000279434	0.703706	6.36294e-79
MASP2	ENSG00000251323	0.703675	6.50987e-79
NFATC3	ENSG00000249464	0.703652	6.61959e-79
DDX17	ENSG00000273015	0.703602	6.85929e-79
IL5	ENSG00000256862	0.703572	7.01379e-79
GNRHR	ENSG00000281501	0.703356	8.19662e-79
TRAJ4	ENSG00000260495	0.703356	8.19966e-79
TRAJ16	ENSG00000279456	0.703188	9.25272e-79
SEMA3G	ENSG00000268505	0.703155	9.47483e-79
GNRH1	ENSG00000278831	0.703108	9.80605e-79
TMSB15A	ENSG00000254615	0.70296	1.09058e-78
TRAJ10	ENSG00000256862	0.702788	1.23506e-78
TRAJ18	ENSG00000279456	0.70246	1.56391e-78
TRAJ1	ENSG00000260565	0.70231	1.74279e-78
NFAT5	ENSG00000228506	0.70222	1.85898e-78
DDX17	ENSG00000271870	0.702036	2.121e-78
BRAF	ENSG00000179818	0.701759	2.58929e-78
ANGPTL3	ENSG00000179818	0.701681	2.73759e-78
TRAJ10	ENSG00000264707	0.701621	2.85839e-78
FAM19A2	ENSG00000256862	0.701455	3.21845e-78
KLRD1	ENSG00000281103	0.701337	3.50314e-78
TRAJ1	ENSG00000179818	0.701328	3.52505e-78
DDX17	ENSG00000258515	0.700822	5.0637e-78
NR2C2	ENSG00000258515	0.700605	5.91536e-78
TRAJ3	ENSG00000279884	0.700595	5.95654e-78
TRAJ5	ENSG00000179818	0.700436	6.67166e-78
FIGF	ENSG00000235997	0.700071	8.65396e-78
CBLB	ENSG00000103472	0.699982	9.22124e-78
IL18RAP	ENSG00000234883	0.699876	9.94797e-78
CREB1	ENSG00000280265	0.699853	1.01078e-77
ANGPTL7	ENSG00000226252	0.699728	1.1054e-77
TRAJ44	ENSG00000264707	0.699706	1.12235e-77
PTGDR	ENSG00000234883	0.699566	1.23971e-77
S100A2	ENSG00000231290	0.699352	1.44368e-77
BRAF	ENSG00000231119	0.699316	1.48086e-77
MASP2	ENSG00000278831	0.699232	1.57248e-77
IFNW1	ENSG00000267481	0.699176	1.63576e-77
IGKC	ENSG00000224220	0.699131	1.68878e-77
TRAJ39	ENSG00000279884	0.698916	1.96683e-77
IFNW1	ENSG00000272374	0.698859	2.04921e-77
TRAJ39	ENSG00000273015	0.69874	2.22874e-77
TRAJ6	ENSG00000244055	0.698678	2.32851e-77
TRAJ38	ENSG00000281501	0.698418	2.80014e-77
PNOC	ENSG00000261218	0.698347	2.9438e-77
TRAJ2	ENSG00000228863	0.6983	3.04261e-77
GNRHR	ENSG00000273015	0.698132	3.4279e-77
ITK	ENSG00000226571	0.697936	3.9355e-77
TRAJ2	ENSG00000279456	0.697876	4.10752e-77
TRAJ31	ENSG00000278831	0.697735	4.53663e-77
TRAJ1	ENSG00000232160	0.697734	4.53964e-77
IL10	ENSG00000268001	0.697731	4.54942e-77
TRAJ44	ENSG00000260495	0.697667	4.76059e-77
NR2C2	ENSG00000260495	0.697656	4.79738e-77
VIPR1	ENSG00000268388	0.697423	5.65469e-77
FGF14	ENSG00000260565	0.697413	5.69523e-77
FAM19A2	ENSG00000267481	0.697324	6.06058e-77
CREB1	ENSG00000258515	0.697268	6.30406e-77
ESR2	ENSG00000246084	0.697178	6.71998e-77
IL5	ENSG00000272374	0.697145	6.87697e-77
IL5	ENSG00000273015	0.697135	6.92754e-77
BRAF	ENSG00000267904	0.697041	7.39656e-77
NR2C2	ENSG00000273015	0.696925	8.02643e-77
TRAJ1	ENSG00000260495	0.696744	9.11709e-77
ESR2	ENSG00000260966	0.696737	9.1649e-77
CD28	ENSG00000265148	0.696667	9.62478e-77
IGKJ5	ENSG00000224220	0.696443	1.1267e-76
TYROBP	ENSG00000224397	0.696312	1.23488e-76
TRAJ4	ENSG00000279456	0.696307	1.23936e-76
TRAJ44	ENSG00000267481	0.696274	1.26841e-76
TRAJ39	ENSG00000228506	0.696258	1.28298e-76
TRAJ18	ENSG00000258473	0.696049	1.48492e-76
PIK3R1	ENSG00000241490	0.69602	1.51525e-76
TRAJ1	ENSG00000279456	0.695999	1.5378e-76
TRAJ2	ENSG00000260565	0.6959	1.64839e-76
GNRHR	ENSG00000267040	0.695881	1.67083e-76
TRAJ38	ENSG00000269985	0.695851	1.7054e-76
BRAF	ENSG00000228506	0.695784	1.78837e-76
NFAT5	ENSG00000260331	0.695503	2.17622e-76
IL5	ENSG00000244055	0.695439	2.27547e-76
NFAT5	ENSG00000279884	0.695396	2.3452e-76
IL5RA	ENSG00000275734	0.695394	2.34902e-76
TRAJ38	ENSG00000279884	0.694918	3.27453e-76
CYLD	ENSG00000265148	0.694894	3.32919e-76
TRAJ6	ENSG00000279884	0.694858	3.41407e-76
RORA	ENSG00000258473	0.694847	3.44157e-76
MASP2	ENSG00000241769	0.69465	3.94674e-76
DDX17	ENSG00000260966	0.694594	4.10289e-76
MASP2	ENSG00000279434	0.694569	4.17583e-76
RORA	ENSG00000255310	0.694563	4.19332e-76
NR2C2	ENSG00000279434	0.694563	4.19396e-76
GNRHR	ENSG00000203446	0.694538	4.2682e-76
BMPR2	ENSG00000232160	0.69452	4.32241e-76
CREB1	ENSG00000255389	0.694386	4.74255e-76
PTGDR	ENSG00000228863	0.694279	5.1097e-76
ZAP70	ENSG00000265206	0.694222	5.31866e-76
PIK3R1	ENSG00000232160	0.694053	5.98249e-76
IGKV3-15	ENSG00000229228	0.69364	7.96651e-76
TRAJ38	ENSG00000255389	0.693502	8.76522e-76
DES	ENSG00000228723	0.693232	1.05755e-75
ANGPTL3	ENSG00000203446	0.69323	1.05839e-75
BRAF	ENSG00000228863	0.693106	1.15343e-75
TRAJ6	ENSG00000272374	0.692974	1.26426e-75
TRAJ5	ENSG00000241490	0.69256	1.68254e-75
MASP2	ENSG00000256862	0.69251	1.74225e-75
TRAJ16	ENSG00000260331	0.692368	1.92151e-75
FAM19A2	ENSG00000260565	0.692191	2.1717e-75
NR2C2	ENSG00000259972	0.692162	2.21552e-75
GNRHR	ENSG00000246084	0.692136	2.25432e-75
TRAJ39	ENSG00000278831	0.692045	2.40062e-75
GNRHR	ENSG00000250802	0.691972	2.52435e-75
NFAT5	ENSG00000241490	0.69185	2.74654e-75
TRBV20-1	ENSG00000245954	0.691532	3.41962e-75
TRAJ38	ENSG00000241490	0.691392	3.76524e-75
IFNW1	ENSG00000256862	0.690959	5.06723e-75
TRAJ12	ENSG00000232160	0.690916	5.22086e-75
TRAJ18	ENSG00000249464	0.690709	6.01803e-75
BMPR2	ENSG00000103472	0.690475	7.06132e-75
TRAJ31	ENSG00000264707	0.690383	7.5231e-75
ANGPTL7	ENSG00000215022	0.690292	8.00298e-75
RORA	ENSG00000261270	0.690255	8.21223e-75
IL26	ENSG00000272374	0.690151	8.81655e-75
NR2C2	ENSG00000261490	0.690026	9.60534e-75
TRAJ2	ENSG00000260495	0.690008	9.71991e-75
GNRHR	ENSG00000260966	0.690005	9.73935e-75
ACVRL1	ENSG00000268388	0.689995	9.80676e-75
TRAJ31	ENSG00000241490	0.689899	1.0473e-74
FAM19A2	ENSG00000179818	0.689825	1.102e-74
APOM	ENSG00000260963	0.689736	1.17103e-74
ROBO2	ENSG00000255310	0.689392	1.48018e-74
TRAJ3	ENSG00000278831	0.689327	1.54742e-74
NFATC3	ENSG00000215386	0.689125	1.77572e-74
TRAJ4	ENSG00000273015	0.689031	1.89312e-74
TRAJ1	ENSG00000272374	0.68902	1.90799e-74
TRAJ10	ENSG00000260495	0.688554	2.61975e-74
IL26	ENSG00000228863	0.688522	2.67776e-74
TRAJ6	ENSG00000273015	0.6885	2.71669e-74
FGF14	ENSG00000255310	0.688308	3.0962e-74
TRAJ39	ENSG00000269985	0.6882	3.33166e-74
ANGPTL3	ENSG00000228506	0.68808	3.61335e-74
TRAJ10	ENSG00000179818	0.688011	3.78635e-74
FGF14	ENSG00000255389	0.687965	3.9073e-74
IL2RB	ENSG00000281103	0.687964	3.90872e-74
TRAJ3	ENSG00000244055	0.687871	4.16338e-74
IL17RD	ENSG00000215483	0.687833	4.27315e-74
MASP2	ENSG00000103472	0.687777	4.43761e-74
TRAJ1	ENSG00000256862	0.687681	4.73623e-74
IFNW1	ENSG00000103472	0.687459	5.50429e-74
IL16	ENSG00000281103	0.687428	5.6223e-74
PPP3R2	ENSG00000256862	0.687389	5.77229e-74
BMPR2	ENSG00000267481	0.687039	7.31064e-74
ANGPTL1	ENSG00000267481	0.687003	7.49368e-74
IFNW1	ENSG00000258515	0.686858	8.2648e-74
TRBV5-1	ENSG00000233093	0.686801	8.58476e-74
PTGDR	ENSG00000241490	0.686438	1.09708e-73
TRAJ39	ENSG00000241490	0.686395	1.12935e-73
TRAJ17	ENSG00000179818	0.686003	1.46975e-73
FLT4	ENSG00000269155	0.686001	1.47232e-73
ITK	ENSG00000103472	0.685915	1.55962e-73
ACVR2A	ENSG00000267481	0.685881	1.59566e-73
TNFSF8	ENSG00000226571	0.685799	1.68599e-73
ESR2	ENSG00000273015	0.685771	1.71828e-73
IFNW1	ENSG00000232160	0.685512	2.04495e-73
ANGPTL3	ENSG00000215386	0.685316	2.33253e-73
IL5RA	ENSG00000184385	0.685095	2.70424e-73
GMFG	ENSG00000237181	0.685082	2.728e-73
PNOC	ENSG00000229228	0.685065	2.76025e-73
TRAJ3	ENSG00000231119	0.685063	2.76364e-73
TRAJ17	ENSG00000232160	0.685047	2.7939e-73
TRAJ12	ENSG00000103472	0.68501	2.86231e-73
CYLD	ENSG00000215386	0.684858	3.16913e-73
TRAJ10	ENSG00000279456	0.684799	3.29655e-73
AGTR1	ENSG00000260963	0.684263	4.72012e-73
TRAJ17	ENSG00000272374	0.684216	4.8701e-73
TRAJ16	ENSG00000244055	0.684193	4.94637e-73
TRAJ3	ENSG00000273015	0.684154	5.07427e-73
TRAJ38	ENSG00000267040	0.684063	5.39508e-73
ICOS	ENSG00000242258	0.684033	5.50317e-73
ANGPTL1	ENSG00000179818	0.684032	5.50618e-73
TNFRSF13C	ENSG00000261218	0.683935	5.87579e-73
ESR2	ENSG00000259804	0.683923	5.9196e-73
GNRH1	ENSG00000246792	0.683918	5.94214e-73
ZAP70	ENSG00000242258	0.683749	6.65012e-73
PTPRC	ENSG00000265148	0.683676	6.98377e-73
PIK3R1	ENSG00000279456	0.683576	7.46122e-73
TRGV3	ENSG00000281103	0.683371	8.55521e-73
PRL	ENSG00000164385	0.683316	8.87277e-73
BRAF	ENSG00000280265	0.683128	1.00551e-72
MASP2	ENSG00000272491	0.682852	1.20768e-72
BRAF	ENSG00000215386	0.682774	1.27188e-72
TRAJ16	ENSG00000281501	0.682598	1.4294e-72
TRAJ18	ENSG00000258515	0.682325	1.71392e-72
GNRH1	ENSG00000269161	0.682295	1.74746e-72
TRAJ5	ENSG00000279048	0.682068	2.03155e-72
NFAT5	ENSG00000269985	0.681908	2.25927e-72
TRAC	ENSG00000235304	0.681863	2.32625e-72
IL12RB1	ENSG00000281103	0.681797	2.4308e-72
ACVR2A	ENSG00000215386	0.681628	2.71729e-72
FAM19A2	ENSG00000279456	0.681554	2.85484e-72
ANGPTL7	ENSG00000272341	0.681475	3.00614e-72
ANGPTL3	ENSG00000260774	0.681456	3.04428e-72
FGF14	ENSG00000279456	0.681311	3.35209e-72
S1PR1	ENSG00000268505	0.681296	3.38539e-72
PIK3CA	ENSG00000256862	0.681291	3.39645e-72
IL16	ENSG00000261218	0.681259	3.46884e-72
TRAJ10	ENSG00000279884	0.681245	3.50073e-72
ANGPTL3	ENSG00000273015	0.681083	3.89397e-72
TRAC	ENSG00000245954	0.681054	3.96994e-72
CREB1	ENSG00000179818	0.681009	4.08977e-72
CREB1	ENSG00000272140	0.680919	4.34068e-72
ACVR2A	ENSG00000273015	0.680817	4.64148e-72
BMPR2	ENSG00000260565	0.680797	4.70251e-72
DDX17	ENSG00000267904	0.680506	5.69686e-72
PLXNC1	ENSG00000246084	0.680347	6.3241e-72
TRAJ2	ENSG00000179818	0.68027	6.65483e-72
CD28	ENSG00000234883	0.68026	6.69521e-72
TRAJ39	ENSG00000205056	0.680119	7.34621e-72
TRAJ44	ENSG00000228863	0.680079	7.54108e-72
IL2	ENSG00000233093	0.680022	7.8286e-72
IGKV3-20	ENSG00000226777	0.679922	8.363e-72
CCL23	ENSG00000224397	0.679862	8.69886e-72
FGF14	ENSG00000280780	0.679822	8.92942e-72
LTA	ENSG00000245954	0.679799	9.06684e-72
CRLF3	ENSG00000256862	0.679784	9.1555e-72
IL5	ENSG00000260331	0.679565	1.0567e-71
NFAT5	ENSG00000260686	0.679565	1.05702e-71
TRAJ38	ENSG00000279434	0.679289	1.26627e-71
NR2C2	ENSG00000278831	0.679216	1.32789e-71
TRAJ18	ENSG00000256862	0.679155	1.38206e-71
TRAJ31	ENSG00000249464	0.679101	1.43248e-71
GNRH1	ENSG00000272491	0.679085	1.44709e-71
TRAJ2	ENSG00000249464	0.679013	1.5168e-71
TRAJ31	ENSG00000244055	0.678997	1.53316e-71
PIK3CG	ENSG00000246084	0.678886	1.64803e-71
HLA-DRA	ENSG00000268001	0.678846	1.69159e-71
CREB1	ENSG00000228863	0.678828	1.71243e-71
ANGPTL7	ENSG00000267040	0.678761	1.7889e-71
CD86	ENSG00000268001	0.678543	2.06225e-71
FAM19A2	ENSG00000231119	0.678543	2.06256e-71
CD79B	ENSG00000261218	0.678274	2.45824e-71
TRAJ10	ENSG00000244055	0.678269	2.4665e-71
TRAJ17	ENSG00000260495	0.678116	2.72481e-71
NR2C2	ENSG00000255389	0.677968	3.00124e-71
TRAJ5	ENSG00000279456	0.677899	3.13905e-71
PTGDR	ENSG00000265148	0.677863	3.21206e-71
TRAJ17	ENSG00000256862	0.677536	3.97428e-71
CBLB	ENSG00000260565	0.677435	4.24472e-71
TRAJ5	ENSG00000149656	0.677363	4.44692e-71
BMPR2	ENSG00000215386	0.677241	4.81462e-71
TRAJ31	ENSG00000279884	0.677026	5.53705e-71
DDX17	ENSG00000261460	0.676936	5.87008e-71
MASP2	ENSG00000273729	0.676864	6.14818e-71
IL26	ENSG00000256862	0.676844	6.23072e-71
SEMA3G	ENSG00000268388	0.676837	6.25894e-71
ACVR2A	ENSG00000279456	0.676767	6.54866e-71
TRAJ12	ENSG00000228863	0.676677	6.9412e-71
TRAJ2	ENSG00000279884	0.67652	7.6861e-71
CYBB	ENSG00000251442	0.676509	7.73877e-71
TEK	ENSG00000261269	0.676507	7.75224e-71
TRAJ2	ENSG00000244063	0.676429	8.15047e-71
TRBV28	ENSG00000245954	0.67625	9.15119e-71
ESR2	ENSG00000272341	0.67619	9.51425e-71
CREB1	ENSG00000246084	0.676129	9.89912e-71
CD247	ENSG00000235304	0.676118	9.96902e-71
TRAJ5	ENSG00000205056	0.676082	1.02027e-70
PNOC	ENSG00000226777	0.675974	1.09427e-70
IL23R	ENSG00000268926	0.675927	1.128e-70
IFNW1	ENSG00000280265	0.675895	1.1511e-70
IL17RD	ENSG00000279694	0.675877	1.16491e-70
TRAJ6	ENSG00000281501	0.675794	1.22887e-70
TRAJ39	ENSG00000281501	0.675715	1.29375e-70
TRAJ17	ENSG00000260565	0.675679	1.32409e-70
NR2C2	ENSG00000261460	0.67558	1.41074e-70
ANGPTL3	ENSG00000278831	0.675441	1.54351e-70
TRAJ10	ENSG00000273015	0.675369	1.61692e-70
ANGPTL7	ENSG00000281501	0.675363	1.62318e-70
TRAJ1	ENSG00000244055	0.675039	1.99931e-70
MASP2	ENSG00000272341	0.674958	2.10682e-70
TRAJ38	ENSG00000272140	0.674937	2.13554e-70
NFAT5	ENSG00000225473	0.674775	2.36988e-70
TRAJ44	ENSG00000279884	0.674749	2.41072e-70
ACVRL1	ENSG00000261269	0.674688	2.5069e-70
IFNW1	ENSG00000260495	0.67462	2.61849e-70
TRAJ31	ENSG00000281501	0.674515	2.80166e-70
MASP2	ENSG00000260686	0.674394	3.02753e-70
TRBC2	ENSG00000281103	0.67438	3.05427e-70
IGKC	ENSG00000226777	0.674335	3.1455e-70
PPP3R2	ENSG00000236318	0.674273	3.27189e-70
CYLD	ENSG00000280265	0.674259	3.30185e-70
TSHB	ENSG00000241490	0.674235	3.35323e-70
ANGPT1	ENSG00000246430	0.67421	3.4066e-70
TRAJ16	ENSG00000273015	0.674184	3.46395e-70
TNFSF13B	ENSG00000251442	0.674024	3.83942e-70
ANGPTL3	ENSG00000260495	0.673983	3.94104e-70
IGKV3-11	ENSG00000229228	0.673914	4.1208e-70
CBLB	ENSG00000278831	0.673856	4.27631e-70
CD79A	ENSG00000226777	0.673719	4.66765e-70
CREB1	ENSG00000272374	0.673695	4.74176e-70
ANGPTL3	ENSG00000232160	0.673635	4.9248e-70
JAK2	ENSG00000228863	0.673604	5.02514e-70
TRAJ12	ENSG00000260565	0.673497	5.38217e-70
FAM19A2	ENSG00000179082	0.673485	5.42268e-70
TRAJ39	ENSG00000279048	0.673451	5.54107e-70
TRAJ38	ENSG00000270540	0.673389	5.76536e-70
TRAJ16	ENSG00000270540	0.6733	6.10565e-70
CNTF	ENSG00000272374	0.673297	6.11579e-70
TRAJ16	ENSG00000279048	0.673167	6.6465e-70
TRBC1	ENSG00000242258	0.673143	6.7488e-70
TSHR	ENSG00000244063	0.673127	6.81657e-70
ANGPTL7	ENSG00000260774	0.673058	7.1261e-70
RORA	ENSG00000261490	0.673042	7.19805e-70
ESR2	ENSG00000246792	0.673014	7.32806e-70
NMBR	ENSG00000275678	0.673	7.39561e-70
TRAJ10	ENSG00000281501	0.672984	7.47069e-70
IFNW1	ENSG00000249464	0.672928	7.74137e-70
IL23R	ENSG00000249464	0.672881	7.97747e-70
ITK	ENSG00000228863	0.672793	8.43949e-70
SHC3	ENSG00000224945	0.67273	8.78651e-70
CD3D	ENSG00000235304	0.672705	8.92862e-70
ANGPTL3	ENSG00000279456	0.672452	1.04907e-69
SLIT2	ENSG00000255399	0.672448	1.05163e-69
MASP2	ENSG00000268189	0.672405	1.08095e-69
NFAT5	ENSG00000280780	0.67233	1.13361e-69
TRAJ44	ENSG00000281501	0.672294	1.15966e-69
MASP2	ENSG00000253298	0.672112	1.30228e-69
IL26	ENSG00000264707	0.672013	1.38752e-69
TRAJ5	ENSG00000273015	0.671905	1.48556e-69
TRAJ44	ENSG00000258473	0.671873	1.51602e-69
NFAT5	ENSG00000258473	0.671857	1.53172e-69
FAM19A2	ENSG00000259175	0.671844	1.54424e-69
FIGF	ENSG00000228401	0.671793	1.59582e-69
RORA	ENSG00000259972	0.671718	1.67374e-69
RORA	ENSG00000231119	0.671711	1.68102e-69
TRAJ17	ENSG00000258515	0.671676	1.71871e-69
TRAJ2	ENSG00000256862	0.671626	1.77376e-69
BMPR2	ENSG00000255389	0.671626	1.77392e-69
TRAJ4	ENSG00000234883	0.671545	1.86772e-69
GNRHR	ENSG00000246067	0.671539	1.87541e-69
ANGPTL3	ENSG00000269985	0.671383	2.06953e-69
TRAJ3	ENSG00000249464	0.671374	2.08128e-69
TRAJ5	ENSG00000278831	0.671372	2.08483e-69
ANGPTL7	ENSG00000260331	0.671328	2.14316e-69
DDX17	ENSG00000260495	0.671222	2.29274e-69
MASP2	ENSG00000179082	0.671208	2.31283e-69
TRAJ12	ENSG00000279456	0.670945	2.73229e-69
CD3D	ENSG00000281103	0.670843	2.91541e-69
CXCL5	ENSG00000250748	0.670826	2.94726e-69
CCL3	ENSG00000237181	0.670768	3.0574e-69
MASP2	ENSG00000255310	0.67053	3.55416e-69
IL15	ENSG00000103472	0.670357	3.96449e-69
NFAT5	ENSG00000261460	0.670275	4.17434e-69
BMPR2	ENSG00000241490	0.670262	4.21067e-69
IL23R	ENSG00000280265	0.670194	4.39371e-69
ITK	ENSG00000235304	0.670165	4.47593e-69
MASP2	ENSG00000270012	0.669863	5.41458e-69
ANGPTL3	ENSG00000272140	0.669665	6.13754e-69
DDX17	ENSG00000255389	0.669663	6.14583e-69
CREB1	ENSG00000264707	0.669617	6.32644e-69
TRAJ2	ENSG00000244055	0.669604	6.37582e-69
TNFSF13B	ENSG00000281103	0.669498	6.81631e-69
ANGPTL1	ENSG00000279456	0.669464	6.96358e-69
MASP2	ENSG00000228506	0.66943	7.11447e-69
DDX17	ENSG00000241769	0.669421	7.1542e-69
BRAF	ENSG00000273015	0.6694	7.25079e-69
DDX17	ENSG00000267481	0.669395	7.27489e-69
TRAJ31	ENSG00000279048	0.669367	7.40376e-69
TRAJ38	ENSG00000246067	0.669334	7.55788e-69
CCR7	ENSG00000245954	0.669317	7.6413e-69
IL16	ENSG00000245954	0.669284	7.80233e-69
TRAJ39	ENSG00000279434	0.669154	8.46678e-69
TRAJ18	ENSG00000260495	0.668833	1.03573e-68
TEK	ENSG00000236304	0.668748	1.09288e-68
TRAJ17	ENSG00000279456	0.668723	1.10977e-68
TRAJ44	ENSG00000244055	0.668668	1.1488e-68
TRAJ12	ENSG00000279048	0.66864	1.16953e-68
CBLB	ENSG00000260774	0.668572	1.22061e-68
ANGPTL3	ENSG00000272374	0.668388	1.36992e-68
IL10RA	ENSG00000242258	0.668221	1.52083e-68
PLCG2	ENSG00000226777	0.668193	1.54812e-68
FGF14	ENSG00000260372	0.668094	1.6474e-68
TRAJ12	ENSG00000267481	0.668046	1.69705e-68
ICOS	ENSG00000246084	0.668003	1.74363e-68
TRAJ4	ENSG00000255389	0.667996	1.75192e-68
CD19	ENSG00000226777	0.667953	1.79889e-68
SH2D1A	ENSG00000233093	0.667924	1.83234e-68
TRAJ1	ENSG00000264707	0.667805	1.97407e-68
TRBV20-1	ENSG00000235304	0.667777	2.00904e-68
NFAT5	ENSG00000270540	0.667715	2.08821e-68
MASP2	ENSG00000265148	0.6677	2.10809e-68
ANGPTL7	ENSG00000260686	0.667684	2.12896e-68
CD247	ENSG00000242258	0.66763	2.20201e-68
CYLD	ENSG00000260565	0.667523	2.35486e-68
TRAJ18	ENSG00000244055	0.667363	2.60202e-68
ANGPTL1	ENSG00000232160	0.667328	2.6594e-68
TRAJ39	ENSG00000244055	0.667299	2.70863e-68
ANGPTL7	ENSG00000238018	0.667216	2.85268e-68
TRBV4-1	ENSG00000260963	0.667207	2.86788e-68
TRAJ17	ENSG00000279048	0.667147	2.97839e-68
TRAJ1	ENSG00000279884	0.667034	3.19573e-68
CYLD	ENSG00000255310	0.666779	3.74579e-68
ESR2	ENSG00000215386	0.666759	3.79424e-68
IGKV3-20	ENSG00000224220	0.6667	3.9365e-68
TRAJ31	ENSG00000279031	0.666612	4.15623e-68
IL15	ENSG00000246084	0.666558	4.30069e-68
DDX17	ENSG00000273729	0.666549	4.32262e-68
IL26	ENSG00000267481	0.666491	4.48412e-68
BRAF	ENSG00000261270	0.666432	4.64965e-68
ANGPTL1	ENSG00000260565	0.666332	4.94969e-68
CNTF	ENSG00000260372	0.66633	4.95409e-68
CD3E	ENSG00000245954	0.666321	4.98181e-68
TRAJ4	ENSG00000278831	0.666099	5.71984e-68
TRAJ38	ENSG00000260966	0.666037	5.94437e-68
IL9R	ENSG00000281103	0.666	6.08329e-68
A2M	ENSG00000261269	0.665996	6.10103e-68
TRAJ12	ENSG00000260495	0.66579	6.93073e-68
TRAJ16	ENSG00000231119	0.665759	7.06699e-68
ANGPTL3	ENSG00000244055	0.665725	7.21914e-68
IL6ST	ENSG00000205056	0.665581	7.89347e-68
TRAJ5	ENSG00000272341	0.665573	7.93078e-68
FABP2	ENSG00000178722	0.665532	8.13359e-68
IGKV1-5	ENSG00000224220	0.665424	8.69983e-68
NR2C2	ENSG00000215022	0.665257	9.65036e-68
MASP2	ENSG00000261485	0.665202	9.98172e-68
CREB1	ENSG00000260966	0.665091	1.06939e-67
CD28	ENSG00000205056	0.665062	1.08866e-67
FAM19A2	ENSG00000272374	0.664985	1.14203e-67
CYLD	ENSG00000256862	0.664721	1.3449e-67
TRAV8-3	ENSG00000281103	0.664698	1.36351e-67
IGKV1-9	ENSG00000229228	0.664496	1.5447e-67
FCER1G	ENSG00000251442	0.66447	1.56973e-67
SSTR1	ENSG00000203688	0.66446	1.57951e-67
TNFRSF8	ENSG00000279711	0.664369	1.67162e-67
CD28	ENSG00000235304	0.664359	1.68133e-67
TRAJ3	ENSG00000228506	0.664306	1.73735e-67
TRAJ18	ENSG00000179818	0.664263	1.78423e-67
IGKJ5	ENSG00000261218	0.66425	1.79868e-67
BMPR2	ENSG00000273015	0.664154	1.9081e-67
TRAJ6	ENSG00000270540	0.664092	1.9823e-67
CALCRL	ENSG00000261269	0.663977	2.12845e-67
ANGPTL3	ENSG00000280265	0.663891	2.24484e-67
ANGPTL1	ENSG00000228506	0.663832	2.32689e-67
TRAJ4	ENSG00000228506	0.663815	2.35275e-67
TRAJ1	ENSG00000273015	0.663777	2.40751e-67
IGLV3-25	ENSG00000229228	0.663753	2.44401e-67
FAM19A2	ENSG00000273888	0.663724	2.48752e-67
TRAJ39	ENSG00000267040	0.663617	2.65662e-67
NFAT5	ENSG00000261490	0.663583	2.7141e-67
IGHV3-21	ENSG00000229228	0.663501	2.85397e-67
TRAJ38	ENSG00000260686	0.663501	2.85408e-67
PTGDR	ENSG00000256862	0.66346	2.92752e-67
MASP2	ENSG00000280265	0.663454	2.93768e-67
TRAJ2	ENSG00000278831	0.663449	2.94595e-67
TRAJ3	ENSG00000234883	0.663337	3.1564e-67
CTLA4	ENSG00000235304	0.663289	3.25157e-67
IL5	ENSG00000269985	0.663259	3.31197e-67
SOS1	ENSG00000232160	0.663249	3.33205e-67
RASGRP3	ENSG00000103472	0.663218	3.3959e-67
TRAJ6	ENSG00000278831	0.663202	3.4301e-67
TNFRSF17	ENSG00000261218	0.663181	3.47502e-67
TRAJ3	ENSG00000279434	0.663083	3.69011e-67
IL26	ENSG00000103472	0.663032	3.80896e-67
LCP2	ENSG00000234883	0.662955	3.99338e-67
TRAJ38	ENSG00000279048	0.662887	4.16181e-67
TRAJ4	ENSG00000279048	0.662794	4.40699e-67
IL5	ENSG00000259972	0.662734	4.57119e-67
UBR1	ENSG00000279456	0.662725	4.59821e-67
TEC	ENSG00000267322	0.662662	4.77817e-67
TRAJ31	ENSG00000228506	0.662658	4.79166e-67
TRAJ31	ENSG00000269985	0.66237	5.71444e-67
CYLD	ENSG00000232160	0.662244	6.17496e-67
GNRH1	ENSG00000273729	0.661968	7.31055e-67
VIP	ENSG00000236304	0.661908	7.58503e-67
ANGPTL1	ENSG00000255389	0.661864	7.78982e-67
MASP2	ENSG00000238018	0.661834	7.93577e-67
ANGPTL1	ENSG00000272374	0.661804	8.08065e-67
IL26	ENSG00000279434	0.661747	8.36783e-67
SEMA3G	ENSG00000228401	0.661741	8.40143e-67
NFAT5	ENSG00000251323	0.661712	8.55146e-67
TNFRSF17	ENSG00000226777	0.661711	8.55491e-67
CD14	ENSG00000251442	0.661671	8.76561e-67
GNRHR	ENSG00000273759	0.661573	9.31011e-67
IGKC	ENSG00000261218	0.661527	9.57209e-67
PTGDR	ENSG00000261270	0.661511	9.66571e-67
CNTF	ENSG00000258473	0.661412	1.027e-66
TRBV28	ENSG00000233093	0.661376	1.04983e-66
IGHV5-51	ENSG00000229228	0.661198	1.1701e-66
ICOS	ENSG00000265148	0.661031	1.29592e-66
IFNW1	ENSG00000244055	0.66075	1.53752e-66
CRLF3	ENSG00000234883	0.660733	1.55417e-66
TYROBP	ENSG00000237181	0.660725	1.56135e-66
PIK3R1	ENSG00000103472	0.660589	1.69604e-66
TRAJ5	ENSG00000279031	0.660556	1.73057e-66
BRAF	ENSG00000273759	0.660374	1.93292e-66
TRAJ31	ENSG00000255389	0.660368	1.9401e-66
B2M	ENSG00000268001	0.660323	1.99463e-66
GNRH1	ENSG00000261485	0.660221	2.12191e-66
TRBC2	ENSG00000235304	0.660186	2.16741e-66
FAM19A2	ENSG00000226383	0.6601	2.28299e-66
TRAJ17	ENSG00000279884	0.660039	2.37022e-66
GNRHR	ENSG00000241490	0.66003	2.38225e-66
TRAJ18	ENSG00000267481	0.65997	2.47156e-66
ANGPTL1	ENSG00000231119	0.659888	2.59778e-66
IL16	ENSG00000242258	0.659811	2.72226e-66
GNRH1	ENSG00000251323	0.659651	2.99975e-66
TRAJ39	ENSG00000260331	0.659578	3.1343e-66
FGF14	ENSG00000249464	0.659497	3.29165e-66
ANGPTL7	ENSG00000261490	0.65927	3.77718e-66
PIK3R1	ENSG00000267904	0.659262	3.79633e-66
C5AR1	ENSG00000224397	0.659093	4.20523e-66
S1PR1	ENSG00000228401	0.658961	4.55357e-66
TRAJ31	ENSG00000260686	0.658956	4.56916e-66
IL5	ENSG00000260966	0.658933	4.63314e-66
CREB1	ENSG00000258473	0.65888	4.7821e-66
TRAJ1	ENSG00000279048	0.658842	4.89342e-66
PIK3CA	ENSG00000103472	0.658841	4.89665e-66
CD28	ENSG00000241490	0.658828	4.93726e-66
FGF14	ENSG00000273015	0.65873	5.23753e-66
CD3E	ENSG00000235304	0.658591	5.69661e-66
TRAJ5	ENSG00000260331	0.658541	5.87007e-66
IGHV3-15	ENSG00000229228	0.658476	6.10726e-66
BRAF	ENSG00000244055	0.658301	6.78506e-66
RORA	ENSG00000269985	0.658297	6.80068e-66
ITK	ENSG00000261270	0.658176	7.31641e-66
DDX17	ENSG00000279434	0.658081	7.74802e-66
TRAJ12	ENSG00000179818	0.658067	7.81337e-66
NFAT5	ENSG00000279434	0.658047	7.90957e-66
CREB1	ENSG00000241490	0.658043	7.92947e-66
CXCL5	ENSG00000231672	0.658017	8.05104e-66
NR2C2	ENSG00000103472	0.657994	8.16534e-66
TRAJ5	ENSG00000228506	0.657829	9.01942e-66
NFAT5	ENSG00000250802	0.657829	9.02115e-66
LBP	ENSG00000260963	0.657744	9.49298e-66
IL6ST	ENSG00000260686	0.657701	9.74113e-66
TRAJ2	ENSG00000231119	0.657641	1.01014e-65
TRBV5-1	ENSG00000245954	0.657585	1.04473e-65
IL16	ENSG00000233093	0.65746	1.12633e-65
RASGRP3	ENSG00000281103	0.657428	1.1477e-65
IL23R	ENSG00000259804	0.657329	1.21868e-65
PTGDR	ENSG00000255389	0.657322	1.22378e-65
IL5	ENSG00000228506	0.65732	1.22502e-65
TRAJ16	ENSG00000269985	0.657305	1.23615e-65
ANGPTL3	ENSG00000260966	0.657115	1.38547e-65
TRAJ5	ENSG00000234883	0.656979	1.50307e-65
MASP2	ENSG00000215022	0.656949	1.53049e-65
TRAJ44	ENSG00000179818	0.656896	1.58049e-65
TRAJ4	ENSG00000231119	0.656885	1.59045e-65
TRAJ6	ENSG00000228506	0.656788	1.68632e-65
CXCR5	ENSG00000247982	0.656774	1.69986e-65
IFNW1	ENSG00000273015	0.656631	1.85265e-65
TRAJ10	ENSG00000231119	0.656564	1.92836e-65
TRAJ4	ENSG00000244055	0.656509	1.99244e-65
IL5	ENSG00000246090	0.65634	2.20522e-65
GNRH1	ENSG00000241769	0.656193	2.40789e-65
PTPRC	ENSG00000242258	0.656098	2.54965e-65
TRAJ3	ENSG00000261460	0.656062	2.60512e-65
SOS1	ENSG00000267481	0.655903	2.86369e-65
ANGPTL7	ENSG00000267904	0.655883	2.89925e-65
TRAJ39	ENSG00000279031	0.65576	3.12004e-65
TRAJ12	ENSG00000260331	0.655731	3.17444e-65
FAM19A2	ENSG00000228506	0.655721	3.19383e-65
FCER1G	ENSG00000224397	0.65569	3.25387e-65
TRAJ38	ENSG00000234883	0.655637	3.35799e-65
TRAV4	ENSG00000235304	0.655522	3.59586e-65
TRAJ2	ENSG00000272374	0.655518	3.60555e-65
NR2C2	ENSG00000232160	0.65548	3.68674e-65
TRAJ31	ENSG00000267040	0.655415	3.83336e-65
TRBV5-1	ENSG00000235304	0.655284	4.14469e-65
NMBR	ENSG00000228723	0.655266	4.1903e-65
ANGPTL7	ENSG00000270540	0.655146	4.5007e-65
BTK	ENSG00000242258	0.655128	4.54865e-65
ANGPTL3	ENSG00000264707	0.6551	4.62467e-65
ESR2	ENSG00000246067	0.655072	4.70425e-65
TFR2	ENSG00000260963	0.654972	4.99298e-65
TG	ENSG00000225826	0.654859	5.33918e-65
ESR2	ENSG00000273759	0.654814	5.48372e-65
ESR2	ENSG00000231119	0.654808	5.50537e-65
MASP2	ENSG00000228863	0.654763	5.65531e-65
ESR2	ENSG00000179082	0.654583	6.29363e-65
FAM19A2	ENSG00000260966	0.654566	6.35559e-65
GNRHR	ENSG00000215022	0.654499	6.61716e-65
BRAF	ENSG00000246084	0.654448	6.81829e-65
IGHG1	ENSG00000226777	0.654432	6.88308e-65
TRAJ39	ENSG00000255389	0.654406	6.99043e-65
NFAT5	ENSG00000246067	0.654277	7.54778e-65
SH2D1A	ENSG00000268001	0.654266	7.59801e-65
CRABP1	ENSG00000243766	0.654177	8.01217e-65
FGF14	ENSG00000256862	0.654126	8.2588e-65
ANGPTL3	ENSG00000228863	0.654083	8.47033e-65
NFAT5	ENSG00000279031	0.654029	8.74618e-65
TRBV7-9	ENSG00000281103	0.653949	9.17192e-65
NR2C2	ENSG00000256862	0.653887	9.51602e-65
TRAJ18	ENSG00000279884	0.653678	1.07685e-64
GNRH1	ENSG00000260331	0.653649	1.09558e-64
ITGAL	ENSG00000245954	0.653611	1.12033e-64
TRAJ1	ENSG00000249464	0.653574	1.14549e-64
TRAJ6	ENSG00000269985	0.653558	1.15634e-64
TRAJ17	ENSG00000273015	0.65354	1.16891e-64
NMBR	ENSG00000181123	0.653539	1.16965e-64
MASP2	ENSG00000236901	0.653488	1.20546e-64
ANGPTL1	ENSG00000205056	0.653457	1.22742e-64
DES	ENSG00000258752	0.653431	1.24707e-64
IL5	ENSG00000241490	0.653225	1.40857e-64
TRAJ4	ENSG00000260331	0.653198	1.43115e-64
JAK2	ENSG00000279456	0.653183	1.44352e-64
FAM19A2	ENSG00000226101	0.653163	1.46145e-64
PIK3CG	ENSG00000103472	0.653005	1.60407e-64
TRAJ10	ENSG00000272374	0.652979	1.62868e-64
ANGPTL1	ENSG00000258473	0.652972	1.63626e-64
CALCRL	ENSG00000268505	0.652913	1.69352e-64
BRAF	ENSG00000259804	0.652895	1.71233e-64
TRAJ31	ENSG00000279434	0.65287	1.73744e-64
NFAT5	ENSG00000268926	0.652843	1.76489e-64
PTGDR	ENSG00000261490	0.652842	1.76655e-64
FAM19A2	ENSG00000103472	0.652556	2.09132e-64
TRAJ31	ENSG00000205056	0.652538	2.11352e-64
CCR7	ENSG00000235304	0.652518	2.1387e-64
ANGPTL3	ENSG00000259804	0.652418	2.26831e-64
BRAF	ENSG00000246067	0.652146	2.66396e-64
TRAJ3	ENSG00000265148	0.651863	3.14716e-64
TRAJ38	ENSG00000225473	0.651755	3.35229e-64
TRAJ16	ENSG00000255389	0.651728	3.40739e-64
MASP2	ENSG00000231119	0.651693	3.47722e-64
TRAJ39	ENSG00000270540	0.651689	3.48591e-64
TRAJ12	ENSG00000249464	0.651612	3.64699e-64
PLXNC1	ENSG00000234883	0.651583	3.71066e-64
TRAJ18	ENSG00000273015	0.651557	3.76682e-64
DEFB124	ENSG00000228723	0.651547	3.78862e-64
TRAJ38	ENSG00000272341	0.651545	3.79514e-64
TRAJ17	ENSG00000264707	0.651517	3.85716e-64
RORA	ENSG00000215022	0.65147	3.96546e-64
TRBC1	ENSG00000245954	0.651418	4.08704e-64
IFNW1	ENSG00000264707	0.651388	4.16106e-64
GNRH1	ENSG00000238018	0.651265	4.47225e-64
CCL4	ENSG00000281103	0.651255	4.49833e-64
TRAJ38	ENSG00000279031	0.651095	4.94287e-64
IL5	ENSG00000272140	0.651085	4.97035e-64
TRBC1	ENSG00000233093	0.651082	4.98059e-64
IL26	ENSG00000241490	0.650995	5.24178e-64
TRAJ38	ENSG00000250802	0.650884	5.59485e-64
RORA	ENSG00000250802	0.650847	5.71609e-64
IL17RD	ENSG00000242540	0.650707	6.20666e-64
CCR4	ENSG00000235304	0.650626	6.50837e-64
NR2E3	ENSG00000260037	0.65058	6.68328e-64
BMPR2	ENSG00000267904	0.650569	6.72719e-64
TRAJ2	ENSG00000280780	0.6505	7.00711e-64
GCG	ENSG00000237457	0.650476	7.10247e-64
TRAJ44	ENSG00000273015	0.65044	7.25687e-64
TRAJ17	ENSG00000260331	0.65018	8.45055e-64
SOS1	ENSG00000272374	0.650066	9.02871e-64
NMBR	ENSG00000258752	0.650015	9.30627e-64
IL5	ENSG00000255389	0.649886	1.00336e-63
IL5	ENSG00000231119	0.649859	1.01923e-63
LTA	ENSG00000233093	0.649727	1.10072e-63
IFNW1	ENSG00000228506	0.649645	1.15467e-63
TRAJ16	ENSG00000278831	0.649569	1.20752e-63
SLIT2	ENSG00000246430	0.649569	1.20758e-63
PIK3R1	ENSG00000256862	0.649502	1.25515e-63
TRAV8-2	ENSG00000233093	0.649495	1.26054e-63
TRAJ3	ENSG00000272140	0.64942	1.31705e-63
TRAJ6	ENSG00000260331	0.649403	1.33001e-63
TRAJ3	ENSG00000270540	0.649393	1.3382e-63
UBR1	ENSG00000260565	0.649323	1.39329e-63
IL6ST	ENSG00000279456	0.649264	1.44234e-63
TRAJ17	ENSG00000149656	0.649233	1.46838e-63
MASP2	ENSG00000269985	0.649233	1.46883e-63
CRLF3	ENSG00000264707	0.649115	1.57334e-63
TRAJ39	ENSG00000272140	0.649088	1.59771e-63
BRAF	ENSG00000215022	0.649059	1.62563e-63
TRAJ4	ENSG00000264707	0.648929	1.7527e-63
PIK3R1	ENSG00000260565	0.648832	1.8552e-63
PIK3R1	ENSG00000205056	0.648817	1.87119e-63
GNRH1	ENSG00000215022	0.64881	1.87872e-63
GNRHR	ENSG00000249464	0.648765	1.92833e-63
ESR2	ENSG00000255389	0.648744	1.95292e-63
FABP2	ENSG00000103472	0.648575	2.15372e-63
IL5	ENSG00000264707	0.648511	2.23565e-63
ESR2	ENSG00000280265	0.648467	2.29345e-63
ANGPT1	ENSG00000255399	0.648267	2.57627e-63
TRAJ12	ENSG00000244055	0.648254	2.59542e-63
TRAJ39	ENSG00000246067	0.648253	2.59774e-63
CSF2RB	ENSG00000242258	0.648243	2.61206e-63
RORA	ENSG00000271870	0.648241	2.61487e-63
IL26	ENSG00000179818	0.648209	2.66469e-63
TRAJ1	ENSG00000265148	0.648147	2.76215e-63
RASGRP3	ENSG00000246084	0.648144	2.76725e-63
CREB1	ENSG00000231119	0.648093	2.85069e-63
BRAF	ENSG00000260331	0.648051	2.92063e-63
TRAV16	ENSG00000268001	0.648031	2.95422e-63
ESR2	ENSG00000261460	0.648016	2.98117e-63
CD247	ENSG00000245954	0.647925	3.14216e-63
TRAJ6	ENSG00000267040	0.647858	3.26716e-63
IL5	ENSG00000255310	0.647758	3.46165e-63
TRAJ38	ENSG00000205056	0.647698	3.58309e-63
TRAJ2	ENSG00000281501	0.647646	3.69384e-63
TRAJ39	ENSG00000260966	0.647631	3.72663e-63
SOS1	ENSG00000273015	0.647575	3.84867e-63
TRAJ3	ENSG00000233360	0.647565	3.87008e-63
TRAJ16	ENSG00000228506	0.647418	4.21563e-63
MASP2	ENSG00000261270	0.64741	4.23461e-63
IFNW1	ENSG00000228863	0.647308	4.49199e-63
GNRHR	ENSG00000260686	0.647241	4.66844e-63
TRAJ10	ENSG00000270540	0.646998	5.37373e-63
GNRH1	ENSG00000255310	0.646956	5.50493e-63
ESR2	ENSG00000267040	0.646834	5.90916e-63
VIPR1	ENSG00000268505	0.646764	6.15249e-63
TRAJ5	ENSG00000231119	0.646754	6.1864e-63
IGHG3	ENSG00000229228	0.646435	7.43755e-63
BRAF	ENSG00000255389	0.64643	7.46081e-63
BTK	ENSG00000281103	0.64636	7.76547e-63
ANGPTL7	ENSG00000250802	0.646278	8.14399e-63
TRAJ1	ENSG00000231119	0.646216	8.43751e-63
CD72	ENSG00000281103	0.646181	8.60926e-63
IL6ST	ENSG00000260565	0.646028	9.40245e-63
MASP2	ENSG00000281501	0.645956	9.80471e-63
TRAJ2	ENSG00000228506	0.645885	1.02124e-62
TRAJ4	ENSG00000233360	0.645783	1.08321e-62
TRAJ31	ENSG00000272140	0.645747	1.10526e-62
FGF14	ENSG00000272374	0.64572	1.12301e-62
RORA	ENSG00000264707	0.645701	1.13517e-62
CREB1	ENSG00000272341	0.645687	1.14434e-62
KLRD1	ENSG00000234883	0.645625	1.18573e-62
ANGPTL7	ENSG00000271870	0.645595	1.20689e-62
LTA	ENSG00000235304	0.645448	1.31268e-62
FGF14	ENSG00000103472	0.645378	1.36718e-62
FABP2	ENSG00000231119	0.645285	1.44152e-62
CRLF3	ENSG00000103472	0.645206	1.50904e-62
PTPRC	ENSG00000226571	0.644782	1.92464e-62
PTGDR	ENSG00000279456	0.644735	1.97675e-62
NFAT5	ENSG00000267040	0.644724	1.98944e-62
CCL21	ENSG00000269155	0.644711	2.00408e-62
TRAJ3	ENSG00000244063	0.644702	2.01389e-62
GNRH1	ENSG00000228506	0.644596	2.14095e-62
CYLD	ENSG00000267904	0.644572	2.17009e-62
BTK	ENSG00000233093	0.644532	2.22111e-62
ANGPTL7	ENSG00000255310	0.644515	2.24218e-62
MASP2	ENSG00000269161	0.644466	2.306e-62
PLXNC1	ENSG00000281103	0.644452	2.32441e-62
TRAJ6	ENSG00000279048	0.644417	2.37167e-62
DDX17	ENSG00000272341	0.644216	2.66032e-62
FGF14	ENSG00000255418	0.644203	2.68077e-62
TRAJ16	ENSG00000279031	0.644179	2.71779e-62
NR2C2	ENSG00000259804	0.644124	2.8046e-62
TRAJ10	ENSG00000279048	0.643849	3.28199e-62
CRLF3	ENSG00000258515	0.643699	3.57443e-62
RASGRP3	ENSG00000234883	0.643625	3.72985e-62
CD3D	ENSG00000233093	0.643588	3.8095e-62
TRAV4	ENSG00000281103	0.643437	4.15142e-62
TRAV8-2	ENSG00000281103	0.643384	4.27953e-62
RFXAP	ENSG00000273015	0.643268	4.57109e-62
ACVR2A	ENSG00000179818	0.643219	4.70185e-62
ANGPTL1	ENSG00000246084	0.643095	5.04573e-62
NFATC3	ENSG00000259804	0.642994	5.34495e-62
CBLB	ENSG00000241490	0.642908	5.61157e-62
SOS1	ENSG00000279456	0.642846	5.81499e-62
IL26	ENSG00000258473	0.642845	5.81807e-62
CRLF3	ENSG00000267481	0.642793	5.99309e-62
TRAJ4	ENSG00000279434	0.642726	6.22612e-62
CCL5	ENSG00000281103	0.642616	6.62463e-62
TRAJ4	ENSG00000267040	0.642599	6.69128e-62
IL12RB1	ENSG00000242258	0.642514	7.01992e-62
FCER1G	ENSG00000237181	0.642434	7.34669e-62
DES	ENSG00000278338	0.642389	7.53969e-62
MASP2	ENSG00000279048	0.642361	7.66057e-62
CCL19	ENSG00000245954	0.64236	7.66235e-62
IL5	ENSG00000267040	0.642291	7.97225e-62
BRAF	ENSG00000205056	0.64229	7.97263e-62
IL6ST	ENSG00000267904	0.642277	8.03483e-62
TRAJ31	ENSG00000272341	0.642274	8.04901e-62
IL21R	ENSG00000242258	0.64203	9.24159e-62
TEC	ENSG00000253298	0.642023	9.28024e-62
DDX17	ENSG00000268189	0.642002	9.39233e-62
FABP2	ENSG00000258515	0.641924	9.81819e-62
TRAJ5	ENSG00000255389	0.641905	9.92239e-62
PTGDR	ENSG00000205056	0.641879	1.00696e-61
TRAJ44	ENSG00000272374	0.641756	1.07945e-61
TRAJ38	ENSG00000247193	0.641575	1.1965e-61
TRAJ18	ENSG00000281501	0.641376	1.33905e-61
IL5RA	ENSG00000173811	0.641309	1.39062e-61
TRAJ5	ENSG00000279434	0.641262	1.42799e-61
TRAJ3	ENSG00000269985	0.641183	1.49312e-61
IFNW1	ENSG00000258473	0.641168	1.50633e-61
SOS1	ENSG00000179818	0.641149	1.52215e-61
ESR2	ENSG00000265148	0.640895	1.75691e-61
ANGPT1	ENSG00000235997	0.640821	1.83279e-61
CRLF3	ENSG00000228863	0.640819	1.83452e-61
IL6ST	ENSG00000232160	0.640811	1.84309e-61
CYLD	ENSG00000228863	0.640769	1.8871e-61
TRAJ18	ENSG00000264707	0.640764	1.89206e-61
IFNW1	ENSG00000281501	0.640709	1.95159e-61
ESR2	ENSG00000261490	0.6405	2.19679e-61
IL5	ENSG00000278831	0.640478	2.22331e-61
IGHV4-28	ENSG00000226777	0.640411	2.30887e-61
GNRH1	ENSG00000270012	0.640323	2.42733e-61
FAM19A2	ENSG00000228863	0.640241	2.54179e-61
TRAJ3	ENSG00000267040	0.640201	2.59905e-61
TRAJ16	ENSG00000267040	0.640194	2.60987e-61
TRAJ6	ENSG00000255389	0.640173	2.64171e-61
TRAJ31	ENSG00000260966	0.640106	2.7429e-61
TRAJ18	ENSG00000270540	0.640087	2.77264e-61
NFAT5	ENSG00000246792	0.63997	2.96015e-61
S1PR1	ENSG00000268388	0.639947	2.99879e-61
ANGPTL7	ENSG00000247193	0.639903	3.07408e-61
IL26	ENSG00000246084	0.639849	3.16962e-61
PIK3CG	ENSG00000265148	0.639816	3.22933e-61
NFAT5	ENSG00000215022	0.639776	3.30295e-61
CREB1	ENSG00000259804	0.639713	3.42209e-61
CXCL5	ENSG00000279822	0.639642	3.56057e-61
TRAJ1	ENSG00000234883	0.639533	3.78511e-61
CNTF	ENSG00000103472	0.639477	3.90628e-61
TEK	ENSG00000228401	0.639426	4.02043e-61
NR2C2	ENSG00000272341	0.639261	4.41244e-61
CBLB	ENSG00000272374	0.639082	4.8781e-61
TRAJ6	ENSG00000233360	0.63905	4.96701e-61
CD79A	ENSG00000229228	0.639016	5.0618e-61
TRAJ10	ENSG00000259972	0.638957	5.2318e-61
TRAJ1	ENSG00000259972	0.638883	5.45492e-61
GNRHR	ENSG00000279884	0.638807	5.69197e-61
CNTF	ENSG00000247193	0.638627	6.29568e-61
ANGPTL7	ENSG00000246067	0.638626	6.29801e-61
PIK3CA	ENSG00000279456	0.638609	6.35908e-61
TNFRSF13B	ENSG00000261218	0.638496	6.77461e-61
ACVR2A	ENSG00000260565	0.638493	6.78623e-61
IGLC2	ENSG00000226777	0.638485	6.81542e-61
FGF14	ENSG00000232160	0.638402	7.13957e-61
NR2C2	ENSG00000273759	0.638387	7.19995e-61
IGKV4-1	ENSG00000224220	0.638243	7.80345e-61
TRAJ38	ENSG00000259972	0.638206	7.96835e-61
TRAJ2	ENSG00000225473	0.638205	7.9712e-61
TRAJ31	ENSG00000270540	0.638119	8.36674e-61
IL17RD	ENSG00000225826	0.638101	8.44967e-61
RORA	ENSG00000238018	0.638054	8.67413e-61
IFNG	ENSG00000234883	0.638022	8.83261e-61
GNRHR	ENSG00000260774	0.638018	8.85002e-61
TRAJ3	ENSG00000255389	0.637987	9.00555e-61
PIK3CG	ENSG00000261270	0.637984	9.01984e-61
CBLB	ENSG00000272341	0.637859	9.67342e-61
TRAJ5	ENSG00000244055	0.637697	1.05878e-60
NFATC2	ENSG00000265148	0.63766	1.08101e-60
TRAJ2	ENSG00000250802	0.637597	1.11972e-60
PPP3R2	ENSG00000260565	0.637589	1.1247e-60
CBLB	ENSG00000279456	0.637467	1.20401e-60
TRAJ3	ENSG00000281501	0.637433	1.22668e-60
CRLF3	ENSG00000246084	0.637429	1.2295e-60
TRAJ1	ENSG00000261490	0.637201	1.39655e-60
FABP2	ENSG00000281468	0.6372	1.39723e-60
TRAJ17	ENSG00000249464	0.637197	1.39962e-60
TRAJ5	ENSG00000260966	0.637189	1.4057e-60
CCL14	ENSG00000261269	0.637169	1.4216e-60
SOS1	ENSG00000267904	0.637072	1.50071e-60
UBR1	ENSG00000267481	0.637055	1.51481e-60
DEFB124	ENSG00000255036	0.636968	1.58948e-60
LCNL1	ENSG00000226252	0.636953	1.6029e-60
IRF9	ENSG00000240731	0.636941	1.61438e-60
ACVR2A	ENSG00000255389	0.636784	1.76141e-60
ANGPTL1	ENSG00000279434	0.636512	2.04898e-60
TRAJ6	ENSG00000259972	0.636386	2.19758e-60
CRABP1	ENSG00000242540	0.636267	2.34743e-60
TRAJ44	ENSG00000259972	0.636223	2.40544e-60
DEFB124	ENSG00000180712	0.635947	2.8041e-60
TRAJ39	ENSG00000272341	0.635929	2.83199e-60
IL26	ENSG00000261270	0.63591	2.86217e-60
RASGRP3	ENSG00000228863	0.635781	3.07484e-60
EDNRB	ENSG00000228401	0.6357	3.21521e-60
ESR2	ENSG00000234572	0.635695	3.22458e-60
DES	ENSG00000181123	0.635672	3.26604e-60
TRAJ4	ENSG00000272341	0.63565	3.30586e-60
PIK3R1	ENSG00000215386	0.635576	3.44427e-60
PIK3CA	ENSG00000228863	0.635571	3.45296e-60
KLRK1	ENSG00000246084	0.635542	3.50904e-60
TRAJ38	ENSG00000203446	0.635367	3.86629e-60
CREB1	ENSG00000255310	0.635349	3.90476e-60
PPP3R2	ENSG00000258515	0.635333	3.94047e-60
GNRHR	ENSG00000272341	0.635321	3.96593e-60
GNRH1	ENSG00000269918	0.635311	3.98895e-60
MASP2	ENSG00000246090	0.635279	4.0608e-60
TRAJ3	ENSG00000259972	0.635266	4.08992e-60
TRAJ31	ENSG00000259972	0.635228	4.17615e-60
GNRH1	ENSG00000272341	0.635186	4.27301e-60
RORA	ENSG00000267040	0.635181	4.28604e-60
ANGPTL7	ENSG00000273759	0.635148	4.36423e-60
TRAJ18	ENSG00000279048	0.635071	4.55365e-60
JAK2	ENSG00000203446	0.635058	4.58797e-60
CRIM1	ENSG00000276850	0.634859	5.12094e-60
UBR1	ENSG00000267904	0.634779	5.35304e-60
ANGPTL1	ENSG00000273015	0.634748	5.4453e-60
IGKV1-12	ENSG00000229228	0.634714	5.54813e-60
TEC	ENSG00000229236	0.634603	5.89932e-60
IL21R	ENSG00000281103	0.63457	6.0069e-60
RORA	ENSG00000246792	0.634517	6.18376e-60
CNTF	ENSG00000260565	0.634497	6.25477e-60
ANGPTL1	ENSG00000272341	0.634259	7.13041e-60
TRAJ39	ENSG00000260686	0.634244	7.19187e-60
ESR2	ENSG00000271870	0.634119	7.70187e-60
CYLD	ENSG00000241490	0.634085	7.84739e-60
MASP2	ENSG00000258473	0.634006	8.19987e-60
TRAV16	ENSG00000233093	0.633913	8.62935e-60
SOS1	ENSG00000272140	0.633892	8.72799e-60
TRAJ2	ENSG00000273015	0.633815	9.10752e-60
IL16	ENSG00000226777	0.633777	9.29872e-60
TRAJ38	ENSG00000261460	0.633754	9.4149e-60
BMPR2	ENSG00000228506	0.633753	9.42069e-60
CNTF	ENSG00000255036	0.633678	9.81945e-60
ANGPTL3	ENSG00000261460	0.633669	9.86838e-60
BMPR2	ENSG00000255310	0.633664	9.89354e-60
TRAJ39	ENSG00000259972	0.633564	1.04567e-59
TRAJ39	ENSG00000234883	0.633471	1.10019e-59
TRAJ5	ENSG00000267040	0.633436	1.12172e-59
GNRH1	ENSG00000215386	0.633339	1.18305e-59
CNTF	ENSG00000258752	0.633272	1.22737e-59
ESR2	ENSG00000250802	0.633179	1.29144e-59
TRAJ6	ENSG00000246067	0.633121	1.33335e-59
TRAJ44	ENSG00000241490	0.633025	1.4055e-59
TRAJ4	ENSG00000270540	0.632995	1.42939e-59
CD247	ENSG00000233093	0.632987	1.43551e-59
GNRH1	ENSG00000179082	0.632984	1.43765e-59
BRAF	ENSG00000264707	0.632972	1.4473e-59
TRAJ12	ENSG00000273015	0.632901	1.50472e-59
TYROBP	ENSG00000251442	0.63288	1.52236e-59
CSF2RB	ENSG00000281103	0.632867	1.53299e-59
IL5	ENSG00000279884	0.632845	1.55129e-59
TRAJ10	ENSG00000278831	0.632844	1.55265e-59
PTGDR	ENSG00000260565	0.632837	1.55829e-59
CD28	ENSG00000281103	0.632829	1.56544e-59
CBLB	ENSG00000228863	0.63274	1.64309e-59
NFAT5	ENSG00000269918	0.632735	1.64835e-59
GNRHR	ENSG00000260331	0.632711	1.66962e-59
TXK	ENSG00000256862	0.632668	1.7098e-59
IGHV3-30	ENSG00000229228	0.632622	1.75331e-59
TRAJ4	ENSG00000269985	0.632584	1.78982e-59
TRAJ10	ENSG00000269985	0.632572	1.80224e-59
IL15	ENSG00000228863	0.632459	1.91676e-59
TRAJ12	ENSG00000270540	0.632427	1.95137e-59
NFATC3	ENSG00000267904	0.632418	1.96069e-59
RORA	ENSG00000261460	0.632402	1.97753e-59
TRAJ3	ENSG00000261490	0.632399	1.98162e-59
NUDT6	ENSG00000246090	0.632362	2.02139e-59
ANGPTL3	ENSG00000255310	0.632362	2.02217e-59
RORA	ENSG00000279884	0.632358	2.02644e-59
TRAJ38	ENSG00000255310	0.632223	2.1809e-59
GNRH1	ENSG00000267040	0.632214	2.19204e-59
TRAJ4	ENSG00000279884	0.632205	2.20323e-59
CIITA	ENSG00000242258	0.632169	2.24694e-59
AZU1	ENSG00000274536	0.632167	2.2498e-59
CREB1	ENSG00000260495	0.632161	2.25627e-59
ANGPTL3	ENSG00000246067	0.632126	2.30024e-59
IL5	ENSG00000250802	0.63208	2.35946e-59
LCK	ENSG00000281103	0.632021	2.4359e-59
PDK1	ENSG00000224220	0.631911	2.58714e-59
PTPRC	ENSG00000103472	0.631889	2.61811e-59
ANGPTL1	ENSG00000258515	0.631868	2.64848e-59
MASP2	ENSG00000259081	0.631805	2.7419e-59
TRAJ18	ENSG00000278831	0.631785	2.77229e-59
DDX17	ENSG00000261485	0.631783	2.77445e-59
TRAJ44	ENSG00000280780	0.63176	2.80949e-59
BMPR2	ENSG00000272374	0.631695	2.91105e-59
DDX17	ENSG00000103472	0.631631	3.01401e-59
SOS1	ENSG00000256862	0.631614	3.04323e-59
TRBV2	ENSG00000235304	0.631601	3.06487e-59
TNFRSF17	ENSG00000268001	0.631567	3.12195e-59
MASP2	ENSG00000249464	0.631533	3.18033e-59
TRAJ1	ENSG00000233360	0.631499	3.24057e-59
CD48	ENSG00000224220	0.631448	3.33209e-59
RASGRP3	ENSG00000265148	0.631441	3.34433e-59
NCR3	ENSG00000261218	0.631418	3.38696e-59
CTLA4	ENSG00000281103	0.631387	3.4446e-59
CREB1	ENSG00000244055	0.631337	3.53982e-59
TRAJ2	ENSG00000241490	0.631279	3.65342e-59
CD3G	ENSG00000235304	0.631199	3.81624e-59
TRAJ10	ENSG00000260331	0.631192	3.83093e-59
IFNW1	ENSG00000255389	0.630968	4.32674e-59
CD28	ENSG00000226571	0.630968	4.32755e-59
TRAJ10	ENSG00000267040	0.630811	4.71318e-59
TRAV8-3	ENSG00000242258	0.630725	4.94047e-59
GNRH1	ENSG00000232160	0.630647	5.15318e-59
IFNW1	ENSG00000269985	0.630589	5.31992e-59
FAM19A3	ENSG00000254615	0.630553	5.42421e-59
TRAJ4	ENSG00000265148	0.630467	5.68486e-59
TRAC	ENSG00000233093	0.630454	5.72336e-59
IL16	ENSG00000265148	0.630445	5.7526e-59
TRAV4	ENSG00000233093	0.630288	6.26539e-59
TRAJ10	ENSG00000228506	0.630242	6.42378e-59
IL23R	ENSG00000279456	0.630096	6.95376e-59
PRKCB	ENSG00000226571	0.630073	7.0402e-59
RFXAP	ENSG00000179818	0.630067	7.06514e-59
ANGPTL7	ENSG00000253490	0.630041	7.16536e-59
TRAJ5	ENSG00000272140	0.629987	7.37662e-59
TRAJ18	ENSG00000260331	0.629953	7.51473e-59
IL5	ENSG00000267904	0.629895	7.75413e-59
TRAJ38	ENSG00000267904	0.629845	7.96934e-59
GNRH1	ENSG00000253298	0.629784	8.23648e-59
SLIT2	ENSG00000235997	0.629767	8.313e-59
TNFSF8	ENSG00000246084	0.629713	8.56025e-59
GNRHR	ENSG00000267904	0.629699	8.62504e-59
CBLB	ENSG00000255389	0.629673	8.74503e-59
CYLD	ENSG00000259804	0.629641	8.89823e-59
IGLV3-10	ENSG00000229228	0.629513	9.53721e-59
JAK2	ENSG00000265148	0.62951	9.55528e-59
TRAJ1	ENSG00000255389	0.629446	9.88902e-59
TRAJ16	ENSG00000259972	0.62944	9.92548e-59
ANGPTL3	ENSG00000279434	0.629361	1.0356e-58
IL6ST	ENSG00000260966	0.629352	1.04063e-58
PLXNC1	ENSG00000103472	0.629351	1.04138e-58
ICOS	ENSG00000233093	0.629344	1.04511e-58
NMBR	ENSG00000278338	0.629341	1.04712e-58
NR2C2	ENSG00000228863	0.629268	1.08926e-58
GNRHR	ENSG00000270540	0.629238	1.10697e-58
ANGPTL7	ENSG00000259972	0.629184	1.13959e-58
TRAJ4	ENSG00000261490	0.629154	1.1583e-58
LCP2	ENSG00000242258	0.629132	1.17213e-58
NR2C2	ENSG00000261270	0.629083	1.20373e-58
CNTF	ENSG00000279456	0.629044	1.22979e-58
SCG2	ENSG00000203688	0.629031	1.23799e-58
TRAJ31	ENSG00000234883	0.628915	1.31794e-58
CIITA	ENSG00000281103	0.628875	1.34675e-58
TRAJ17	ENSG00000270540	0.628802	1.40155e-58
TRAJ16	ENSG00000279434	0.628795	1.40669e-58
TRAJ18	ENSG00000234883	0.628754	1.43795e-58
GNRH1	ENSG00000228863	0.62858	1.57964e-58
TG	ENSG00000217455	0.628574	1.58474e-58
RORA	ENSG00000246090	0.628552	1.60357e-58
ANGPTL1	ENSG00000272140	0.628495	1.65429e-58
KLRC4	ENSG00000246084	0.628469	1.67765e-58
NUDT6	ENSG00000179818	0.628458	1.68705e-58
PLXNC1	ENSG00000265148	0.628322	1.81617e-58
DEFB124	ENSG00000258752	0.628319	1.81828e-58
TGFBR3	ENSG00000276850	0.628267	1.87086e-58
MASP2	ENSG00000226252	0.628262	1.87553e-58
TRAJ6	ENSG00000234883	0.628203	1.93639e-58
CD28	ENSG00000103472	0.628152	1.99026e-58
TRAJ10	ENSG00000279031	0.628134	2.00991e-58
GNRHR	ENSG00000247193	0.628121	2.02333e-58
TRAJ5	ENSG00000279884	0.628111	2.03457e-58
IL5	ENSG00000246792	0.628102	2.04467e-58
TLR4	ENSG00000251442	0.628025	2.13148e-58
CD3G	ENSG00000234883	0.627941	2.23005e-58
DDX17	ENSG00000259804	0.627896	2.28424e-58
IL5	ENSG00000215022	0.627831	2.36557e-58
PIK3CG	ENSG00000228863	0.627825	2.3737e-58
ANGPTL3	ENSG00000236318	0.627825	2.37373e-58
TRAJ4	ENSG00000241490	0.627771	2.44286e-58
TRAJ2	ENSG00000279434	0.627743	2.48117e-58
CYLD	ENSG00000244055	0.627603	2.67458e-58
TRAJ5	ENSG00000269985	0.62756	2.73718e-58
MASP2	ENSG00000273759	0.627536	2.77224e-58
MASP2	ENSG00000255418	0.62752	2.79653e-58
BMPR2	ENSG00000280265	0.627511	2.81039e-58
MSR1	ENSG00000224397	0.627502	2.82385e-58
PDK1	ENSG00000256862	0.627492	2.83967e-58
GNRH1	ENSG00000269985	0.627422	2.94754e-58
GMFG	ENSG00000233093	0.627328	3.10129e-58
NR2E3	ENSG00000259175	0.627309	3.13343e-58
CXCL5	ENSG00000234810	0.627259	3.21803e-58
GNRHR	ENSG00000253490	0.627206	3.311e-58
TRAJ3	ENSG00000250802	0.627178	3.36064e-58
RORA	ENSG00000246067	0.627162	3.39022e-58
PPP3R2	ENSG00000178722	0.627031	3.63759e-58
TRAJ17	ENSG00000279031	0.626966	3.7657e-58
TRAJ31	ENSG00000246067	0.626934	3.83119e-58
TNFRSF13C	ENSG00000226571	0.62692	3.86084e-58
GNRHR	ENSG00000271870	0.626702	4.33864e-58
TRAJ1	ENSG00000270540	0.626611	4.55517e-58
TRAJ38	ENSG00000280780	0.626611	4.55669e-58
IL6ST	ENSG00000256862	0.62659	4.60885e-58
PIK3R1	ENSG00000267481	0.626574	4.64795e-58
NR2C2	ENSG00000258473	0.626546	4.71676e-58
TRAJ16	ENSG00000234883	0.626488	4.86568e-58
TNFSF13B	ENSG00000234883	0.626465	4.92687e-58
TRAJ3	ENSG00000260331	0.626413	5.0659e-58
ANGPTL3	ENSG00000260331	0.626389	5.13113e-58
KLRK1	ENSG00000234883	0.626322	5.3188e-58
NR2C2	ENSG00000273729	0.626251	5.52522e-58
DDX17	ENSG00000270012	0.626179	5.74098e-58
DDX17	ENSG00000278831	0.626156	5.81203e-58
TRAJ10	ENSG00000260686	0.62614	5.86478e-58
ANGPTL3	ENSG00000270820	0.62612	5.92681e-58
TRAJ12	ENSG00000258515	0.626074	6.07314e-58
DES	ENSG00000275734	0.625965	6.43763e-58
NR2C2	ENSG00000260331	0.62587	6.77563e-58
TRAJ3	ENSG00000246067	0.625837	6.8939e-58
TRAJ38	ENSG00000261490	0.625816	6.97394e-58
ANGPTL3	ENSG00000281501	0.625809	6.99747e-58
FAM19A2	ENSG00000262420	0.625797	7.04264e-58
FAM19A2	ENSG00000272140	0.625785	7.08875e-58
NR2C2	ENSG00000228506	0.625761	7.1798e-58
TRAJ10	ENSG00000255389	0.625593	7.85274e-58
LEP	ENSG00000276850	0.625364	8.878e-58
TRAJ6	ENSG00000280780	0.625307	9.15117e-58
TRAV9-2	ENSG00000245954	0.6253	9.18286e-58
TRAJ44	ENSG00000255310	0.625293	9.22113e-58
TRAJ6	ENSG00000272140	0.625292	9.22212e-58
NFAT5	ENSG00000272341	0.625254	9.41265e-58
TLR8	ENSG00000251442	0.625246	9.45483e-58
GCGR	ENSG00000229847	0.625188	9.74797e-58
TRAJ5	ENSG00000260686	0.625188	9.75203e-58
S1PR1	ENSG00000236304	0.625158	9.90843e-58
RBP5	ENSG00000226571	0.625134	1.00353e-57
CXCR6	ENSG00000234883	0.625101	1.02125e-57
IL23R	ENSG00000246084	0.625091	1.02648e-57
PIK3CG	ENSG00000234883	0.625065	1.04093e-57
GNRHR	ENSG00000280780	0.625052	1.048e-57
TRAJ6	ENSG00000279031	0.624964	1.09853e-57
TRAJ1	ENSG00000228506	0.624962	1.09971e-57
DES	ENSG00000275678	0.624944	1.11038e-57
CREB1	ENSG00000278831	0.62494	1.11267e-57
IGHD2-2	ENSG00000226777	0.624852	1.16624e-57
NFAT5	ENSG00000255418	0.624833	1.17788e-57
IL26	ENSG00000203446	0.624831	1.17899e-57
NCR3	ENSG00000233093	0.624668	1.28594e-57
TRAV9-2	ENSG00000235304	0.624645	1.30223e-57
IL15	ENSG00000281103	0.624583	1.34555e-57
NFATC2	ENSG00000241490	0.624564	1.35943e-57
ESR2	ENSG00000267904	0.62454	1.37661e-57
NFAT5	ENSG00000271870	0.624528	1.38535e-57
ESR2	ENSG00000215022	0.624315	1.55171e-57
TRAJ6	ENSG00000255310	0.624277	1.58315e-57
TRAJ17	ENSG00000269985	0.624242	1.61334e-57
ANGPTL3	ENSG00000215022	0.624208	1.64253e-57
JAK2	ENSG00000280265	0.624174	1.67299e-57
TRAJ31	ENSG00000225473	0.624098	1.7418e-57
TRAJ3	ENSG00000273759	0.623976	1.85819e-57
ANGPTL7	ENSG00000270820	0.623966	1.86753e-57
TRAJ18	ENSG00000259972	0.623965	1.86872e-57
TRAJ4	ENSG00000272140	0.623922	1.91161e-57
PIK3CA	ENSG00000232160	0.623769	2.07335e-57
TXK	ENSG00000255389	0.623688	2.16431e-57
EED	ENSG00000246067	0.623634	2.22804e-57
ANGPTL7	ENSG00000261270	0.623622	2.24207e-57
GNRH1	ENSG00000267322	0.623589	2.28164e-57
TRAJ1	ENSG00000278831	0.623475	2.42346e-57
BMPR2	ENSG00000260032	0.623443	2.46464e-57
SOS1	ENSG00000228863	0.623427	2.48572e-57
NMBR	ENSG00000255036	0.623424	2.49002e-57
ELN	ENSG00000255399	0.623366	2.56734e-57
BRAF	ENSG00000261460	0.623337	2.60744e-57
TRAJ10	ENSG00000234883	0.623306	2.65011e-57
TRAJ12	ENSG00000272374	0.623149	2.88023e-57
ANGPTL7	ENSG00000236318	0.623116	2.93085e-57
NFAT5	ENSG00000205056	0.623066	3.0093e-57
CBLB	ENSG00000232160	0.62296	3.18247e-57
SOS1	ENSG00000103472	0.622941	3.21518e-57
CREB1	ENSG00000267040	0.62294	3.21661e-57
FABP7	ENSG00000246095	0.622914	3.26246e-57
UBR1	ENSG00000232160	0.622824	3.42081e-57
TRAJ17	ENSG00000278831	0.622808	3.44927e-57
ANGPTL1	ENSG00000260495	0.622791	3.48079e-57
TRBJ2-7	ENSG00000281103	0.622715	3.62268e-57
PIK3R1	ENSG00000260244	0.622608	3.83415e-57
NFATC3	ENSG00000279456	0.622577	3.8976e-57
IL5	ENSG00000228863	0.622533	3.98947e-57
CYLD	ENSG00000214106	0.622391	4.30055e-57
NFATC2	ENSG00000205056	0.622362	4.36538e-57
TRBC1	ENSG00000265148	0.622351	4.39184e-57
TRAJ1	ENSG00000260331	0.622335	4.42922e-57
EDNRB	ENSG00000261269	0.622314	4.4776e-57
NR2C2	ENSG00000236901	0.622279	4.56121e-57
RFXAP	ENSG00000261485	0.622225	4.69349e-57
NFAT5	ENSG00000272732	0.622204	4.74493e-57
ANGPTL3	ENSG00000267040	0.622161	4.85431e-57
IGHD6-25	ENSG00000226777	0.62209	5.04044e-57
TRBV5-1	ENSG00000281103	0.622086	5.05033e-57
TRAV29DV5	ENSG00000281103	0.622055	5.1328e-57
CREB1	ENSG00000279434	0.62203	5.20115e-57
IL26	ENSG00000279456	0.621984	5.32885e-57
CRLF3	ENSG00000228506	0.621965	5.38212e-57
GNRH1	ENSG00000255418	0.621955	5.41016e-57
TRAJ4	ENSG00000261460	0.621844	5.73747e-57
TRAJ31	ENSG00000255310	0.621766	5.97651e-57
SLIT2	ENSG00000261269	0.621763	5.98781e-57
TRAJ2	ENSG00000272140	0.621699	6.19167e-57
LEFTY1	ENSG00000229847	0.621695	6.20604e-57
CD3D	ENSG00000237181	0.621679	6.25709e-57
PTGDR	ENSG00000272341	0.621674	6.27367e-57
IL16	ENSG00000235304	0.621666	6.30029e-57
ANGPTL7	ENSG00000279884	0.621628	6.42764e-57
TRAJ6	ENSG00000250802	0.621537	6.74234e-57
TRAJ17	ENSG00000228506	0.621414	7.19523e-57
TRAJ18	ENSG00000272374	0.621379	7.32963e-57
TRAJ12	ENSG00000231119	0.621372	7.35546e-57
IL6ST	ENSG00000267481	0.621366	7.37811e-57
TRAJ38	ENSG00000253490	0.621245	7.86303e-57
SEMA3G	ENSG00000269186	0.621237	7.89747e-57
IGLC2	ENSG00000261218	0.62122	7.96739e-57
FAM19A2	ENSG00000269985	0.62116	8.22173e-57
FAM19A2	ENSG00000232160	0.621086	8.54966e-57
MASP2	ENSG00000268926	0.621059	8.67238e-57
ANGPTL1	ENSG00000234572	0.620788	9.99723e-57
TRBV2	ENSG00000281103	0.620787	1.00037e-56
FGF14	ENSG00000280265	0.620757	1.01606e-56
CYLD	ENSG00000273015	0.620742	1.02385e-56
TRBV2	ENSG00000233093	0.62071	1.04114e-56
ANGPTL7	ENSG00000225473	0.620695	1.04969e-56
FLT3	ENSG00000265148	0.620642	1.07947e-56
DDX17	ENSG00000261270	0.620507	1.15864e-56
MASP2	ENSG00000230910	0.620481	1.1742e-56
LTA	ENSG00000242258	0.620476	1.17722e-56
IGKV3-15	ENSG00000224220	0.620452	1.19217e-56
NR2C2	ENSG00000267040	0.620352	1.2564e-56
TRAJ6	ENSG00000260686	0.620348	1.25916e-56
TRAJ6	ENSG00000260966	0.620313	1.28215e-56
NR2C2	ENSG00000251323	0.620216	1.34905e-56
TRBV6-1	ENSG00000233093	0.620207	1.35537e-56
CBLB	ENSG00000272140	0.620201	1.35997e-56
TRAJ5	ENSG00000265148	0.620107	1.42821e-56
DDX17	ENSG00000238018	0.620022	1.49329e-56
IL1R2	ENSG00000224259	0.619954	1.54787e-56
TRAJ3	ENSG00000279048	0.619946	1.55434e-56
NR2C1	ENSG00000261460	0.619875	1.61256e-56
IFNW1	ENSG00000246084	0.619855	1.62965e-56
CCL19	ENSG00000235304	0.619801	1.67674e-56
GNRHR	ENSG00000261490	0.61979	1.68644e-56
ANGPTL7	ENSG00000268189	0.619743	1.72828e-56
BMPR2	ENSG00000179818	0.619731	1.73927e-56
BMPR2	ENSG00000272341	0.619696	1.77062e-56
TRAJ44	ENSG00000260331	0.619582	1.87979e-56
TRAJ39	ENSG00000261490	0.619579	1.88243e-56
BMPR2	ENSG00000260966	0.619556	1.90523e-56
TRAJ18	ENSG00000265148	0.619244	2.24239e-56
FGF14	ENSG00000269918	0.619186	2.31214e-56
IGKV3-7	ENSG00000229228	0.619146	2.35974e-56
TRAJ3	ENSG00000241490	0.619135	2.37334e-56
CCR5	ENSG00000242258	0.619043	2.49093e-56
CALCRL	ENSG00000268388	0.618976	2.57875e-56
CCR6	ENSG00000265148	0.618936	2.63369e-56
TRAJ3	ENSG00000253490	0.618607	3.1251e-56
ITGAL	ENSG00000265206	0.618578	3.17426e-56
RORA	ENSG00000265148	0.618576	3.17686e-56
BMPR2	ENSG00000260331	0.618538	3.24089e-56
TRAJ2	ENSG00000234883	0.618515	3.27903e-56
TRAJ16	ENSG00000260686	0.618438	3.41256e-56
GNRH1	ENSG00000270820	0.618419	3.44783e-56
ESR2	ENSG00000264707	0.618391	3.49781e-56
A2M	ENSG00000246430	0.618338	3.59546e-56
TRAJ38	ENSG00000215022	0.618325	3.61927e-56
PIK3CA	ENSG00000241490	0.618318	3.6327e-56
CBLB	ENSG00000267481	0.618301	3.6649e-56
PTPRC	ENSG00000228863	0.618287	3.69175e-56
NCR3	ENSG00000235304	0.618269	3.72671e-56
TRAJ4	ENSG00000279031	0.618214	3.83434e-56
TRAJ17	ENSG00000281501	0.618185	3.89332e-56
CD3D	ENSG00000268001	0.618156	3.95278e-56
PTGDR	ENSG00000272374	0.618092	4.0858e-56
SOS1	ENSG00000260565	0.618076	4.12135e-56
ESR2	ENSG00000269985	0.618018	4.24583e-56
BMPR2	ENSG00000258473	0.617994	4.30074e-56
TRAJ38	ENSG00000233360	0.617946	4.40934e-56
CTLA4	ENSG00000234883	0.617907	4.49778e-56
TRAJ39	ENSG00000234572	0.617893	4.53134e-56
PIK3CG	ENSG00000256862	0.617859	4.6121e-56
SH2D1A	ENSG00000224220	0.617823	4.69932e-56
ANGPTL7	ENSG00000268845	0.617786	4.79002e-56
ACVR2A	ENSG00000260966	0.617757	4.86296e-56
UBR1	ENSG00000260966	0.617638	5.17142e-56
IL23R	ENSG00000255418	0.617497	5.56442e-56
IL5	ENSG00000251323	0.617484	5.6038e-56
IGLV1-47	ENSG00000229228	0.617478	5.62148e-56
RXFP2	ENSG00000274536	0.617467	5.65192e-56
TXK	ENSG00000279456	0.617466	5.65612e-56
TRAJ3	ENSG00000267904	0.617358	5.98142e-56
IFNW1	ENSG00000272140	0.617272	6.25383e-56
TRAJ44	ENSG00000225473	0.617221	6.42085e-56
IFNW1	ENSG00000246792	0.617092	6.86413e-56
SH2D1A	ENSG00000242258	0.617068	6.95187e-56
FAM19A2	ENSG00000260495	0.617043	7.04035e-56
DEFB124	ENSG00000181123	0.617018	7.13357e-56
PIK3R1	ENSG00000246084	0.616954	7.373e-56
UBR1	ENSG00000272140	0.616933	7.45347e-56
BRAF	ENSG00000269985	0.616859	7.74297e-56
IL6ST	ENSG00000215386	0.616853	7.76699e-56
CREB1	ENSG00000260686	0.616733	8.26719e-56
JAK2	ENSG00000260565	0.616704	8.39004e-56
AGER	ENSG00000269186	0.616693	8.4412e-56
CREB1	ENSG00000260331	0.616664	8.56566e-56
FGFR1	ENSG00000261578	0.616492	9.36521e-56
NR2C2	ENSG00000280265	0.616382	9.90909e-56
ESR2	ENSG00000260331	0.61637	9.97202e-56
TRAJ44	ENSG00000205056	0.616345	1.01028e-55
IL26	ENSG00000205056	0.616246	1.06315e-55
BRAF	ENSG00000267040	0.616191	1.09383e-55
TSHB	ENSG00000225473	0.616166	1.10825e-55
CBLB	ENSG00000258515	0.61616	1.11138e-55
TRAJ4	ENSG00000149656	0.616074	1.16211e-55
FSHR	ENSG00000237125	0.615971	1.22548e-55
TRAJ39	ENSG00000215022	0.615877	1.28579e-55
NUDT6	ENSG00000232160	0.615841	1.31012e-55
HTR3C	ENSG00000254615	0.61581	1.33149e-55
ANGPTL1	ENSG00000261270	0.615788	1.34667e-55
PDK1	ENSG00000228863	0.615736	1.38295e-55
ANGPTL3	ENSG00000247193	0.615692	1.41475e-55
TRAJ6	ENSG00000261460	0.615687	1.41875e-55
GNRH1	ENSG00000267904	0.615661	1.43789e-55
MASP2	ENSG00000246084	0.61557	1.5063e-55
TRAJ4	ENSG00000215022	0.615495	1.56583e-55
JAK2	ENSG00000261270	0.615444	1.60724e-55
IL26	ENSG00000228506	0.615352	1.68513e-55
LAT	ENSG00000273729	0.615328	1.70665e-55
ANGPTL7	ENSG00000234883	0.615231	1.7934e-55
ANGPTL7	ENSG00000249464	0.615224	1.79981e-55
IREB2	ENSG00000228506	0.615191	1.83092e-55
NR2C2	ENSG00000179082	0.615095	1.92353e-55
PTGDR	ENSG00000226571	0.615079	1.93998e-55
KLRD1	ENSG00000246084	0.615001	2.01891e-55
ESR2	ENSG00000268189	0.614933	2.09047e-55
NUDT6	ENSG00000272374	0.61488	2.14816e-55
NR2E3	ENSG00000253298	0.614831	2.20348e-55
TRAJ6	ENSG00000279434	0.614805	2.23308e-55
TRAJ2	ENSG00000267040	0.614761	2.28427e-55
ACVR2A	ENSG00000272374	0.614707	2.348e-55
PRKCB	ENSG00000265148	0.614582	2.50322e-55
TRAJ18	ENSG00000260686	0.6145	2.61178e-55
NFAT5	ENSG00000246090	0.614494	2.6195e-55
UBR1	ENSG00000215386	0.614469	2.65326e-55
ANGPTL7	ENSG00000279031	0.614355	2.81256e-55
SOS1	ENSG00000255389	0.614245	2.97597e-55
TRAJ17	ENSG00000267040	0.614225	3.00654e-55
DDX17	ENSG00000272491	0.614199	3.04727e-55
LTB4R2	ENSG00000259081	0.614184	3.07033e-55
TRAJ44	ENSG00000228506	0.613993	3.38674e-55
DEFB1	ENSG00000229656	0.613967	3.43185e-55
TEC	ENSG00000246792	0.613939	3.48201e-55
PIK3R1	ENSG00000255389	0.613889	3.57191e-55
TLR4	ENSG00000203446	0.613859	3.62749e-55
TRAJ10	ENSG00000233360	0.613808	3.72279e-55
TRAJ5	ENSG00000281501	0.613701	3.93276e-55
PTGDR	ENSG00000179818	0.613697	3.93982e-55
TRAJ4	ENSG00000205056	0.613655	4.02501e-55
TRAJ39	ENSG00000250802	0.613545	4.25881e-55
ANGPTL7	ENSG00000233360	0.613465	4.43634e-55
ZAP70	ENSG00000247982	0.613388	4.61408e-55
GNRH1	ENSG00000261270	0.613353	4.69864e-55
CD22	ENSG00000198106	0.613278	4.8805e-55
SOS2	ENSG00000232160	0.613214	5.04451e-55
NR2C2	ENSG00000246792	0.613204	5.06997e-55
TRAV8-2	ENSG00000235304	0.613136	5.24951e-55
ITK	ENSG00000256862	0.613027	5.54831e-55
TRBV20-1	ENSG00000233093	0.613019	5.57136e-55
RBP5	ENSG00000233093	0.612978	5.68811e-55
DDX17	ENSG00000260306	0.61297	5.71109e-55
NR2C2	ENSG00000270012	0.61281	6.19681e-55
TRAV4	ENSG00000245954	0.612779	6.29578e-55
CYLD	ENSG00000234883	0.612778	6.2988e-55
APOBEC3G	ENSG00000268001	0.612639	6.76318e-55
PTGDR	ENSG00000258515	0.612557	7.0498e-55
IL6ST	ENSG00000280265	0.612457	7.41827e-55
TRAJ12	ENSG00000256862	0.612383	7.70442e-55
IFNW1	ENSG00000270540	0.61233	7.91733e-55
CYLD	ENSG00000261270	0.61226	8.20179e-55
TRAJ17	ENSG00000231119	0.612182	8.53573e-55
TRAJ5	ENSG00000215022	0.612126	8.78137e-55
TSHB	ENSG00000279456	0.612099	8.90396e-55
TRAJ4	ENSG00000259972	0.612016	9.28881e-55
LIFR	ENSG00000244968	0.61199	9.41045e-55
JAK2	ENSG00000247193	0.611938	9.66205e-55
PIK3CA	ENSG00000228506	0.61188	9.95216e-55
NR1D2	ENSG00000267904	0.61183	1.02086e-54
NFATC3	ENSG00000268926	0.611827	1.02255e-54
TSHB	ENSG00000232160	0.611791	1.04128e-54
NUDT6	ENSG00000260565	0.611619	1.13624e-54
TRAJ4	ENSG00000260686	0.611567	1.16637e-54
ACVR2A	ENSG00000228506	0.611494	1.21056e-54
CBLB	ENSG00000246084	0.611441	1.244e-54
ACVR2A	ENSG00000280265	0.61142	1.25715e-54
ACVR2A	ENSG00000255310	0.611418	1.25818e-54
MASP2	ENSG00000269918	0.611295	1.33931e-54
TRAV17	ENSG00000281103	0.611088	1.48782e-54
NCR3	ENSG00000247982	0.611023	1.53732e-54
[truncated: 3,669 more rows]

## Sheet: Sheet2
name	Degree	style	chr	star	end	stend	gene_name
ENSG00000281103	146	lncRNA	chr7	38341577	38378804	+	TRG-AS1
ENSG00000235304	99	lncRNA	chrX	39304956	39327362	-	LINC01281
ENSG00000242258	93	lncRNA	chr7	150433654	150448140	+	LINC00996
ENSG00000103472	92	lncRNA	chr16	29074976	29116718	+	RRN3P2
ENSG00000246084	92	lncRNA	chr14	97427071	97582146	+	LINC02325
ENSG00000265148	87	lncRNA	chr17	58324472	58415766	+	TSPOAP1-AS1
ENSG00000234883	84	lncRNA	chr21	25561909	25575168	+	MIR155HG
ENSG00000233093	78	lncRNA	chrX	136639539	136642429	+	LINC00892
ENSG00000261218	78	lncRNA	chr16	81738248	81767868	+	AC099524.1
ENSG00000228863	77	lncRNA	chr1	160670778	160699761	+	AL121985.1
ENSG00000256862	77	lncRNA	chr12	3871579	3910382	+	AC005842.1
ENSG00000229228	74	lncRNA	chr1	231591292	231612090	-	LINC00582
ENSG00000245954	74	lncRNA	chr4	152090459	152104720	+	LINC02273
ENSG00000279456	74	lncRNA	chr9	41061290	41062917	+	AL353763.1
ENSG00000232160	73	lncRNA	chrX	132217053	132432862	+	RAP2C-AS1
ENSG00000260565	73	lncRNA	chr16	2660348	2682379	-	ERVK13-1
ENSG00000267481	73	lncRNA	chr19	19788755	19790531	-	AC011477.2
ENSG00000226777	71	lncRNA	chr14	105917979	105932642	+	FAM30A
ENSG00000255389	68	lncRNA	chr6	111599875	111602295	+	Z97989.1
ENSG00000241490	66	lncRNA	chr3	114214313	114236204	+	AC093010.2
ENSG00000179818	65	lncRNA	chr2	69962263	70103220	-	PCBP1-AS1
ENSG00000258515	65	lncRNA	chr14	20451305	20451918	+	AL355075.2
ENSG00000267904	65	lncRNA	chr19	16639967	16640668	-	AC024075.1
ENSG00000272374	65	lncRNA	chr6	35220370	35224630	-	Z97832.2
ENSG00000273015	64	lncRNA	chr12	45718046	45727775	-	AC008124.1
ENSG00000228506	63	lncRNA	chr6	99424922	99432323	+	AL513550.1
ENSG00000260966	63	lncRNA	chr11	103050687	103055799	-	AP001486.2
ENSG00000272140	62	lncRNA	chr10	73703735	73713581	-	AC022400.4
ENSG00000215386	60	lncRNA	chr21	15928296	16645467	+	MIR99AHG
ENSG00000278831	60	lncRNA	chr10	124623353	124624079	+	AL513190.1
ENSG00000244055	58	lncRNA	chr7	92457564	92495601	+	AC007566.1
ENSG00000264707	58	lncRNA	chr18	6256747	6260934	+	L3MBTL4-AS1
ENSG00000272341	58	lncRNA	chr6	16764346	16766883	+	AL137003.2
ENSG00000280265	58	lncRNA	chr16	19392213	19393468	-	AC130456.7
ENSG00000258473	56	lncRNA	chr14	77048172	77086457	-	AC007686.2
ENSG00000261490	55	lncRNA	chr4	10068089	10073019	-	AC005674.2
ENSG00000259804	54	lncRNA	chr16	67561411	67562309	-	AC027682.1
ENSG00000260495	54	lncRNA	chr16	81310731	81313423	-	AC009148.1
ENSG00000279434	54	lncRNA	chr14	35086035	35088059	+	AL049776.1
ENSG00000205056	53	lncRNA	chr12	92466451	92492091	+	LINC02397
ENSG00000261270	53	lncRNA	chr16	56940278	56941342	+	AC012181.2
ENSG00000203446	51	lncRNA	chr7	40538127	40546928	-	AC004988.1
ENSG00000255310	51	lncRNA	chr8	11107788	11109726	-	AF131215.5
ENSG00000261460	51	lncRNA	chr15	72278867	72351794	+	AC009690.2
ENSG00000231119	47	lncRNA	chr20	47352561	47354633	+	AL031666.1
ENSG00000260331	47	lncRNA	chr2	18547386	18548204	-	AC079148.1
ENSG00000260686	47	lncRNA	chr5	122832356	122834533	+	AC008669.1
ENSG00000259972	46	lncRNA	chr16	74305127	74335346	-	AC009120.2
ENSG00000267040	46	lncRNA	chr18	57630302	57669296	+	AC027097.1
ENSG00000269985	46	lncRNA	chr6	5451683	5458075	-	AL021328.1
ENSG00000281501	45	lncRNA	chr4	25160641	25201440	+	SEPSECS-AS1
ENSG00000224220	43	lncRNA	chr2	25421117	25427643	+	AC104699.1
ENSG00000226252	43	lncRNA	chr1	47225797	47230750	+	AL135960.1
ENSG00000247193	43	lncRNA	chr4	36244116	36274220	+	AC104078.1
ENSG00000271870	43	lncRNA	chr3	3152942	3153435	+	AC024060.2
ENSG00000215022	42	lncRNA	chr6	13264861	13295586	-	AL008729.1
ENSG00000246067	42	lncRNA	chr11	83072052	83107789	+	RAB30-DT
ENSG00000268001	41	lncRNA	chr19	48255675	48258199	+	CARD8-AS1
ENSG00000226571	39	lncRNA	chr6	139271362	139667284	+	AL592429.2
ENSG00000253490	39	lncRNA	chr8	29748309	29798492	+	LINC02099
ENSG00000225473	38	lncRNA	chr3	193553213	193555088	+	ATP13A4-AS1
ENSG00000249464	38	lncRNA	chr4	123539026	123962698	+	LINC01091
ENSG00000261269	38	lncRNA	chr5	72439903	72442387	-	AC093278.2
ENSG00000234572	36	lncRNA	chr2	64846130	64863626	-	LINC01800
ENSG00000250802	35	lncRNA	chr5	77086688	77166909	+	ZBED3-AS1
ENSG00000268189	35	lncRNA	chr19	15379076	15381194	+	AC005785.1
ENSG00000279884	35	lncRNA	chr2	174545385	174546335	-	AC010894.5
ENSG00000270540	34	lncRNA	chr2	236367560	236369102	+	AC093915.1
ENSG00000251323	33	lncRNA	chr11	78423982	78429836	-	LINC02728
ENSG00000251442	33	lncRNA	chr4	78638780	78683185	+	LINC01094
ENSG00000273759	33	lncRNA	chr20	62928621	62929297	-	AL117379.1
ENSG00000246792	32	lncRNA	chr8	90646420	90670929	+	AC106038.1
ENSG00000247982	32	lncRNA	chr15	57300365	57307769	+	LINC00926
ENSG00000269918	31	lncRNA	chr8	11104691	11106704	-	AF131215.6
ENSG00000233360	30	lncRNA	chr22	37641832	37658377	-	Z83844.2
ENSG00000238018	30	lncRNA	chr2	54661011	54680045	-	AC093110.1
ENSG00000279031	30	lncRNA	chr16	3292879	3293403	+	AC004232.2
ENSG00000279048	29	lncRNA	chr7	17940503	17942922	+	AC080080.1
ENSG00000270820	28	lncRNA	chr2	61471188	61484130	+	AC016727.1
ENSG00000280780	28	lncRNA	chr5	147559994	147662009	+	JAKMIP2-AS1
ENSG00000224397	27	lncRNA	chr20	50247643	50283250	+	SMIM25
ENSG00000246090	27	lncRNA	chr4	99088805	99301356	+	AP002026.1
ENSG00000260774	27	lncRNA	chr5	213898	217279	-	AC021087.3
ENSG00000237181	26	lncRNA	chr7	603185	608482	+	AC147651.4
ENSG00000255418	26	lncRNA	chr11	23154683	23203161	+	LINC02718
ENSG00000224660	25	lncRNA	chr3	15254184	15264515	+	SH3BP5-AS1
ENSG00000253298	25	lncRNA	chr5	159448556	159466291	-	LINC01845
ENSG00000244063	23	lncRNA	chr2	113829390	113831119	-	AC104653.2
ENSG00000259081	22	lncRNA	chr14	76774284	76781518	-	AF111169.3
ENSG00000268926	22	lncRNA	chr9	95772323	95776282	+	AL354861.3
ENSG00000230910	21	lncRNA	chr6	68627879	68635161	-	AL391807.1
ENSG00000265206	21	lncRNA	chr17	58330884	58332508	-	AC004687.1
ENSG00000272732	21	lncRNA	chr7	7550104	7552440	-	AC004982.1
ENSG00000216863	19	lncRNA	chr6	6346465	6622771	-	LY86-AS1
ENSG00000236318	18	lncRNA	chr7	17374867	17467256	+	AC019117.2
ENSG00000260963	17	lncRNA	chr16	52607006	52614640	+	AC026462.3
ENSG00000261485	17	lncRNA	chr13	28136843	28138193	-	PAN3-AS1
ENSG00000273729	17	lncRNA	chr14	77028086	77031572	+	AC007686.3
ENSG00000179082	16	lncRNA	chr9	129321016	129324905	+	C9orf106
ENSG00000228401	16	lncRNA	chr9	136648610	136660421	-	AL590226.1
ENSG00000260032	16	lncRNA	chr20	36045618	36051018	-	NORAD
ENSG00000267322	16	lncRNA	chr18	49814023	49851059	+	SNHG22
ENSG00000255399	15	lncRNA	chr12	114408173	114412831	+	TBX5-AS1
ENSG00000257550	15	lncRNA	chr12	53513891	53517608	+	AC023509.2
ENSG00000270012	15	lncRNA	chrX	49273054	49275768	+	AC232271.1
ENSG00000241769	14	lncRNA	chrX	149527591	149540959	-	LINC00893
ENSG00000269161	14	lncRNA	chr19	17518330	17520565	-	AC010618.2
ENSG00000272917	14	lncRNA	chr12	9642872	9657070	+	AC010186.4
ENSG00000281649	14	lncRNA	chr9	37079645	37090928	+	EBLN3P
ENSG00000175611	13	lncRNA	chr9	95759231	95876049	-	LINC00476
ENSG00000227544	13	lncRNA	chr7	35715032	35734924	+	AC018647.1
ENSG00000236304	13	lncRNA	chr11	76657056	76663866	+	AP001189.1
ENSG00000236671	13	lncRNA	chr10	52230398	52314507	-	PRKG1-AS1
ENSG00000246430	13	lncRNA	chr8	56496048	56559823	-	LINC00968
ENSG00000268388	13	lncRNA	chr16	86474529	86509099	-	FENDRR
ENSG00000272491	13	lncRNA	chr1	48227888	48229561	-	AL109659.2
ENSG00000149656	12	lncRNA	chr20	64290385	64313132	+	LINC00266-1
ENSG00000198106	12	lncRNA	chr16	29291220	29372110	+	AC025279.1
ENSG00000214106	12	lncRNA	chr7	154928460	154952188	+	PAXIP1-AS2
ENSG00000235997	12	lncRNA	chr2	30346623	30361010	+	LINC01936
ENSG00000261131	12	lncRNA	chr16	46660696	46661591	-	AC012186.2
ENSG00000268505	12	lncRNA	chr16	86192793	86198913	-	AC135012.3
ENSG00000274769	12	lncRNA	chr2	61115787	61164825	+	AC016747.4
ENSG00000232591	11	lncRNA	chr10	7444340	7472040	-	LINC02642
ENSG00000234336	10	lncRNA	chr7	28180322	28243917	+	JAZF1-AS1
ENSG00000236901	10	lncRNA	chr9	123109494	123115477	-	MIR600HG
ENSG00000260306	10	lncRNA	chr16	21794095	21795759	-	AC092375.2
ENSG00000273888	10	lncRNA	chr14	51649516	51651744	-	FRMD6-AS1
ENSG00000274712	10	lncRNA	chr17	68205489	68207493	+	AC005332.4
ENSG00000248663	9	lncRNA	chr5	117415509	117546298	+	LINC00992
ENSG00000251364	9	lncRNA	chr11	7418826	7513644	-	AC107884.1
ENSG00000269186	9	lncRNA	chr16	86195954	86199720	+	LINC01082
ENSG00000279386	9	lncRNA	chr4	37866561	37867091	-	AC021106.3
ENSG00000240731	8	lncRNA	chr1	1317581	1318689	-	AL139287.1
ENSG00000262420	8	lncRNA	chr16	11741910	11744506	+	AC007613.1
ENSG00000238078	7	lncRNA	chr1	220829255	220832429	+	LINC01352
ENSG00000245719	7	lncRNA	chr15	67834310	67838879	-	AC009292.1
ENSG00000258752	7	lncRNA	chr14	89349377	89366081	+	AL357093.2
ENSG00000260372	7	lncRNA	chr18	26655737	27190698	+	AQP4-AS1
ENSG00000275734	7	lncRNA	chr16	89671568	89685304	+	AC010538.1
ENSG00000278338	7	lncRNA	chr13	41955808	41981565	+	VWA8-AS1
ENSG00000215483	6	lncRNA	chr13	40079106	40535807	-	LINC00598
ENSG00000226101	6	lncRNA	chr17	72072333	72103035	+	LINC02097
ENSG00000226383	6	lncRNA	chr2	156011530	156254950	-	LINC01876
ENSG00000228723	6	lncRNA	chr3	9192493	9194453	+	SRGAP3-AS2
ENSG00000236830	6	lncRNA	chr21	36131767	36175815	-	CBR3-AS1
ENSG00000254615	6	lncRNA	chr8	106270144	106272902	+	AC027031.2
ENSG00000255036	6	lncRNA	chr9	97238497	97377287	+	STRA6LP
ENSG00000260070	6	lncRNA	chr7	36319775	36320479	+	AC006960.3
ENSG00000268845	6	lncRNA	chr19	6953211	6954904	+	AC025278.1
ENSG00000272752	6	lncRNA	chr7	100336104	100367831	+	STAG3L5P-PVRIG2P-PILRB
ENSG00000275678	6	lncRNA	chr1	67121605	67123956	-	AL133320.2
ENSG00000281468	6	lncRNA	chr19	27802838	27803472	+	AC006504.7
ENSG00000178722	5	lncRNA	chr5	61610424	61793401	+	C5orf64
ENSG00000230314	5	lncRNA	chr6	11043482	11079154	+	ELOVL2-AS1
ENSG00000232021	5	lncRNA	chr4	108167525	108258037	+	LEF1-AS1
ENSG00000244040	5	lncRNA	chr3	159902045	160225299	-	IL12A-AS1
ENSG00000247416	5	lncRNA	chr11	112959279	112963460	-	AP000802.1
ENSG00000259175	5	lncRNA	chr15	80554609	80562944	-	AC108451.1
ENSG00000260244	5	lncRNA	chr4	155734448	155737062	+	AC104083.1
ENSG00000269044	5	lncRNA	chr19	16633797	16635269	-	AC024075.2
ENSG00000271895	5	lncRNA	chr1	11029659	11030528	+	AL109811.2
ENSG00000180712	4	lncRNA	chr4	184334292	184353977	-	LINC02363
ENSG00000181123	4	lncRNA	chr22	30475364	30492804	+	AC004832.1
ENSG00000184385	4	lncRNA	chr21	42102134	42108534	-	UMODL1-AS1
ENSG00000196167	4	lncRNA	chr11	111290787	111305498	-	COLCA1
ENSG00000204380	4	lncRNA	chr2	158658337	158735002	-	PKP4-AS1
ENSG00000226806	4	lncRNA	chr2	135820191	135823087	+	AC011893.1
ENSG00000228315	4	lncRNA	chr22	23638487	23717356	-	GUSBP11
ENSG00000229236	4	lncRNA	chrY	20464916	20575519	-	TTTY10
ENSG00000231290	4	lncRNA	chr20	58515379	58619888	+	APCDD1L-DT
ENSG00000260037	4	lncRNA	chr15	71818396	71823384	+	AC104938.1
ENSG00000269155	4	lncRNA	chr6	167795530	167798248	+	AL009178.2
ENSG00000270179	4	lncRNA	chr11	113368478	113369117	+	AP002840.2
ENSG00000270696	4	lncRNA	chr2	75660462	75662208	+	AC005034.3
ENSG00000279821	4	lncRNA	chr5	177476631	177479656	-	AC145098.2
ENSG00000281005	4	lncRNA	chr16	3263743	3267567	+	LINC00921
ENSG00000197989	3	lncRNA	chr1	28578538	28583132	-	SNHG12
ENSG00000217455	3	lncRNA	chr7	3140234	3174654	-	AC073316.1
ENSG00000225826	3	lncRNA	chr1	168784012	168792886	+	LINC00626
ENSG00000234452	3	lncRNA	chr10	89456064	89468140	+	SLC16A12-AS1
ENSG00000242540	3	lncRNA	chr2	5696220	5719670	+	AC010729.2
ENSG00000243766	3	lncRNA	chr7	27198575	27207259	+	HOTTIP
ENSG00000259225	3	lncRNA	chr15	37980676	38062340	+	LINC02345
ENSG00000260339	3	lncRNA	chr15	72376113	72378788	+	HEXA-AS1
ENSG00000260911	3	lncRNA	chr16	31043150	31049868	+	AC135050.3
ENSG00000263958	3	lncRNA	chr18	72868388	72881399	+	AC091138.1
ENSG00000267745	3	lncRNA	chr17	35406684	35409768	-	AC060766.7
ENSG00000272223	3	lncRNA	chr6	43033897	43034405	-	AL136304.1
ENSG00000274536	3	lncRNA	chrX	66015461	66020422	+	AL034397.3
ENSG00000279694	3	lncRNA	chr15	78339208	78341757	-	AC011270.2
ENSG00000173811	2	lncRNA	chr3	42732575	42746768	+	CCDC13-AS1
ENSG00000174403	2	lncRNA	chr20	62544343	62551526	-	MIR1-1HG-AS1
ENSG00000177822	2	lncRNA	chr4	181874438	182145249	-	TENM3-AS1
ENSG00000178734	2	lncRNA	chr13	75871038	75883811	+	LMO7DN
ENSG00000204929	2	lncRNA	chr2	65436711	66200373	+	AC007389.1
ENSG00000225889	2	lncRNA	chr2	64143239	64252859	+	AC012368.1
ENSG00000230587	2	lncRNA	chr2	43092530	43132482	-	LINC02580
ENSG00000231113	2	lncRNA	chr6	42940364	42948360	+	AL035587.1
ENSG00000233250	2	lncRNA	chrX	53432722	53433032	-	AC233728.1
ENSG00000237037	2	lncRNA	chr22	42090931	42137742	+	NDUFA6-DT
ENSG00000250658	2	lncRNA	chr4	187304083	187309682	-	AC097652.1
ENSG00000258551	2	lncRNA	chr15	91408708	91605873	+	AC104035.1
ENSG00000261335	2	lncRNA	chr17	76671942	76673658	+	AC005837.1
ENSG00000261502	2	lncRNA	chr16	63056786	63129654	-	AC040174.1
ENSG00000262198	2	lncRNA	chr13	22918591	22924602	+	AL157931.1
ENSG00000265121	2	lncRNA	chr17	77264180	77264776	-	AC068594.1
ENSG00000266904	2	lncRNA	chr19	19757366	19776423	-	LINC00663
ENSG00000268095	2	lncRNA	chr19	51888025	51900463	+	ZNF649-AS1
ENSG00000272927	2	lncRNA	chr4	661209	661945	-	AC107464.3
ENSG00000178977	1	lncRNA	chr17	8220642	8224043	-	LINC00324
ENSG00000184608	1	lncRNA	chr8	11368402	11438658	+	FAM167A-AS1
ENSG00000225880	1	lncRNA	chr1	826206	827522	-	LINC00115
ENSG00000226337	1	lncRNA	chr9	68541036	68644442	+	TMEM252-DT
ENSG00000227502	1	lncRNA	chr6	113868013	113873351	-	LINC01268
ENSG00000231131	1	lncRNA	chr10	52450874	52755507	-	LNCAROD
ENSG00000233968	1	lncRNA	chr10	19710328	19728550	-	AL157895.1
ENSG00000234394	1	lncRNA	chr9	68306528	68330626	+	AL353608.3
ENSG00000244968	1	lncRNA	chr5	38556765	38671216	+	LIFR-AS1
ENSG00000254102	1	lncRNA	chr8	64574306	64581921	-	AC090136.3
ENSG00000260806	1	lncRNA	chr14	96500810	96502321	-	AL163051.1
ENSG00000260979	1	lncRNA	chr16	8962706	8966990	+	AC022167.3
ENSG00000267414	1	lncRNA	chr18	44676927	44679717	-	AC120049.1
ENSG00000267577	1	lncRNA	chr19	55158939	55177540	+	AC010327.4
ENSG00000269994	1	lncRNA	chr9	87008440	87042419	-	AL513318.2
ENSG00000270127	1	lncRNA	chr15	100547765	100550153	-	AC027020.2
ENSG00000270194	1	lncRNA	chr3	37241789	37244177	-	AC097359.2
ENSG00000271797	1	lncRNA	chr5	115262505	115263448	+	AC008494.3
ENSG00000272100	1	lncRNA	chr1	52353487	52353877	+	AL513218.1
ENSG00000272654	1	lncRNA	chr1	153977743	153979160	+	AL358472.2
ENSG00000278133	1	lncRNA	chr16	31122235	31124064	+	AC135050.6
ENSG00000279148	1	lncRNA	chr12	100026248	100027540	-	AC126474.1
ENSG00000279261	1	lncRNA	chr1	234757619	234760056	-	AL360294.1
MASP2	109	mRNA
GNRH1	98	mRNA
ANGPTL7	96	mRNA
RORA	94	mRNA
NFAT5	93	mRNA
GNRHR	89	mRNA
NR2C2	88	mRNA
ESR2	86	mRNA
TRAJ38	83	mRNA
BRAF	79	mRNA
TRAJ39	79	mRNA
DDX17	78	mRNA
IL5	78	mRNA
TRAJ31	77	mRNA
TRAJ6	76	mRNA
IFNW1	75	mRNA
TRAJ3	75	mRNA
TRAJ4	75	mRNA
TRAJ16	73	mRNA
TRAJ5	73	mRNA
TRAJ10	71	mRNA
TRAJ44	71	mRNA
ANGPTL3	70	mRNA
TRAJ1	70	mRNA
TRAJ2	70	mRNA
CREB1	67	mRNA
FAM19A2	66	mRNA
TRAJ18	66	mRNA
TRAJ17	65	mRNA
PTGDR	63	mRNA
TRAJ12	63	mRNA
ANGPTL1	62	mRNA
FGF14	59	mRNA
CBLB	58	mRNA
CYLD	52	mRNA
ACVR2A	51	mRNA
BMPR2	50	mRNA
IL26	49	mRNA
PIK3R1	49	mRNA
CNTF	47	mRNA
SOS1	47	mRNA
JAK2	46	mRNA
CRLF3	45	mRNA
FABP2	43	mRNA
NUDT6	41	mRNA
UBR1	41	mRNA
IL6ST	39	mRNA
PIK3CA	39	mRNA
PPP3R2	37	mRNA
TXK	36	mRNA
IL23R	34	mRNA
RFXAP	33	mRNA
TSHB	31	mRNA
NR2C1	30	mRNA
ITK	29	mRNA
CBL	25	mRNA
CD28	25	mRNA
CIITA	25	mRNA
NFATC3	25	mRNA
PIK3CG	25	mRNA
RASGRP3	25	mRNA
PTPRC	24	mRNA
VIP	24	mRNA
LAT	22	mRNA
SOS2	22	mRNA
PGR	21	mRNA
IREB2	20	mRNA
LTB4R2	20	mRNA
PLXNC1	20	mRNA
IGHD6-6	19	mRNA
NR2E3	19	mRNA
PDK1	19	mRNA
RABEP1	19	mRNA
ZC3HAV1	19	mRNA
ROBO2	18	mRNA
IL5RA	17	mRNA
MAPK8	17	mRNA
SH2D1A	17	mRNA
IL15	16	mRNA
BMPR1A	15	mRNA
IL16	15	mRNA
TEC	15	mRNA
TNFSF8	15	mRNA
FLT3	14	mRNA
KLRK1	14	mRNA
NR1D2	14	mRNA
PRKCB	14	mRNA
BTK	13	mRNA
CCL16	13	mRNA
TRBC1	13	mRNA
CALCRL	12	mRNA
CXCR6	12	mRNA
EDNRB	12	mRNA
IL7R	12	mRNA
LEAP2	12	mRNA
NFATC2	12	mRNA
TNFSF13B	12	mRNA
AKT3	11	mRNA
CD3D	11	mRNA
CD3G	11	mRNA
DEFB124	11	mRNA
DES	11	mRNA
FIGF	11	mRNA
ICOS	11	mRNA
IL10RA	11	mRNA
ITGAL	11	mRNA
LCNL1	11	mRNA
PLCG2	11	mRNA
ZAP70	11	mRNA
CCR6	10	mRNA
CD19	10	mRNA
CD247	10	mRNA
CD40LG	10	mRNA
CRABP1	10	mRNA
IRF9	10	mRNA
KLRC4	10	mRNA
NR3C2	10	mRNA
RASGRP1	10	mRNA
RBP5	10	mRNA
ACVRL1	9	mRNA
CCR4	9	mRNA
CD79B	9	mRNA
EIF2AK2	9	mRNA
IGKJ5	9	mRNA
IL18RAP	9	mRNA
KLRD1	9	mRNA
NCR3	9	mRNA
NMBR	9	mRNA
S1PR1	9	mRNA
TEK	9	mRNA
TLR4	9	mRNA
TNFRSF13C	9	mRNA
AGER	8	mRNA
CCR7	8	mRNA
CD48	8	mRNA
GMFG	8	mRNA
LTA	8	mRNA
SLIT2	8	mRNA
TLR1	8	mRNA
TRAV9-2	8	mRNA
TRBJ2-7	8	mRNA
TRBV5-1	8	mRNA
ANGPT1	7	mRNA
CCR5	7	mRNA
CSF2RB	7	mRNA
IL17RD	7	mRNA
LCP2	7	mRNA
MALT1	7	mRNA
PTGDS	7	mRNA
RXFP1	7	mRNA
SEMA3G	7	mRNA
TG	7	mRNA
TNFRSF17	7	mRNA
TRAC	7	mRNA
TRAV4	7	mRNA
TRBC2	7	mRNA
TRBV20-1	7	mRNA
TRBV28	7	mRNA
TRIM22	7	mRNA
TSHR	7	mRNA
A2M	6	mRNA
APOBEC3G	6	mRNA
CD22	6	mRNA
CD3E	6	mRNA
CD72	6	mRNA
CTLA4	6	mRNA
CXCR4	6	mRNA
CXCR5	6	mRNA
CYBB	6	mRNA
PIK3R5	6	mRNA
TLR7	6	mRNA
TNFRSF13B	6	mRNA
TRAV16	6	mRNA
TRBV18	6	mRNA
TRBV2	6	mRNA
TRBV6-5	6	mRNA
CCL19	5	mRNA
CD86	5	mRNA
CYSLTR2	5	mRNA
FLT3LG	5	mRNA
IL11RA	5	mRNA
IL12RB1	5	mRNA
IL18R1	5	mRNA
IL21R	5	mRNA
IL7	5	mRNA
LCK	5	mRNA
PPP3CC	5	mRNA
SEMA4D	5	mRNA
TRAV13-2	5	mRNA
TRAV23DV6	5	mRNA
TRAV26-1	5	mRNA
TRAV5	5	mRNA
TRAV6	5	mRNA
TRAV8-2	5	mRNA
TRAV8-3	5	mRNA
TRAV8-4	5	mRNA
TRAV8-6	5	mRNA
TRBV19	5	mRNA
TRBV5-4	5	mRNA
TRGV2	5	mRNA
VIPR1	5	mRNA
ANGPTL5	4	mRNA
ANGPTL6	4	mRNA
CD4	4	mRNA
CD79A	4	mRNA
CXCL13	4	mRNA
FCER1G	4	mRNA
GDF10	4	mRNA
IFNG	4	mRNA
IGHG1	4	mRNA
IGHV3-21	4	mRNA
IGHV3-30	4	mRNA
IGHV5-51	4	mRNA
IGKC	4	mRNA
IGKV1-5	4	mRNA
IGKV3-11	4	mRNA
IGKV3-15	4	mRNA
IGKV3-20	4	mRNA
IGKV3-7	4	mRNA
IGKV3D-11	4	mRNA
IGKV4-1	4	mRNA
IGLC2	4	mRNA
IGLC3	4	mRNA
IGLV2-14	4	mRNA
IGLV3-21	4	mRNA
IGLV6-57	4	mRNA
IL21	4	mRNA
IL2RB	4	mRNA
INPP5D	4	mRNA
LIMS1	4	mRNA
LMBR1	4	mRNA
LTB	4	mRNA
LTBP2	4	mRNA
MSR1	4	mRNA
NFKBIZ	4	mRNA
PIK3CD	4	mRNA
PNOC	4	mRNA
TLR8	4	mRNA
TMSB15A	4	mRNA
TRAV17	4	mRNA
TRAV20	4	mRNA
TRAV29DV5	4	mRNA
TRAV8-1	4	mRNA
TRBV3-1	4	mRNA
TRBV6-1	4	mRNA
TRBV6-6	4	mRNA
TRBV7-9	4	mRNA
TYROBP	4	mRNA
ALB	3	mRNA
B2M	3	mRNA
C8G	3	mRNA
CCL21	3	mRNA
CCL3	3	mRNA
CD14	3	mRNA
CD244	3	mRNA
CGB5	3	mRNA
CHP2	3	mRNA
CMKLR1	3	mRNA
CORT	3	mRNA
CRH	3	mRNA
FGF7	3	mRNA
GH1	3	mRNA
GIPR	3	mRNA
GRAP2	3	mRNA
HLA-DMB	3	mRNA
HLA-DOB	3	mRNA
HLA-DRA	3	mRNA
HRG	3	mRNA
HTR3E	3	mRNA
IGHA1	3	mRNA
IGHD6-25	3	mRNA
IGHG2	3	mRNA
IGHJ3	3	mRNA
IGHV3-11	3	mRNA
IGHV3-15	3	mRNA
IGHV3-74	3	mRNA
IGHV4-39	3	mRNA
IGHV4-59	3	mRNA
IGKV1-12	3	mRNA
IGKV1-39	3	mRNA
IGKV1-9	3	mRNA
IGLJ1	3	mRNA
IGLV1-40	3	mRNA
IGLV1-44	3	mRNA
IGLV1-47	3	mRNA
IGLV3-1	3	mRNA
IGLV3-25	3	mRNA
IL10	3	mRNA
IL33	3	mRNA
IL3RA	3	mRNA
LIFR	3	mRNA
MSTN	3	mRNA
PDGFRA	3	mRNA
PTK2B	3	mRNA
TIE1	3	mRNA
TRAV21	3	mRNA
TRAV36DV7	3	mRNA
TRBJ2-3	3	mRNA
TRBV15	3	mRNA
TRBV5-7	3	mRNA
TRGV3	3	mRNA
TYK2	3	mRNA
VTN	3	mRNA
AGTR1	2	mRNA
APOM	2	mRNA
AVPR1B	2	mRNA
BMP7	2	mRNA
C3AR1	2	mRNA
CCL13	2	mRNA
CCL14	2	mRNA
CCL4	2	mRNA
CCL4L2	2	mRNA
CCR1	2	mRNA
CD1D	2	mRNA
CD8A	2	mRNA
CECR1	2	mRNA
CER1	2	mRNA
CR2	2	mRNA
CTSB	2	mRNA
CTSS	2	mRNA
CXCL10	2	mRNA
DKK1	2	mRNA
ESRRB	2	mRNA
FAM19A3	2	mRNA
FCGR2B	2	mRNA
FCGR3A	2	mRNA
FGR	2	mRNA
HTR3C	2	mRNA
IGHG3	2	mRNA
IGHJ2	2	mRNA
IGHV1-2	2	mRNA
IGHV3-23	2	mRNA
IGHV3-33	2	mRNA
IGHV3-38	2	mRNA
IGHV3-48	2	mRNA
IGHV4-28	2	mRNA
IGKV1-6	2	mRNA
IGKV1D-39	2	mRNA
IGKV2D-28	2	mRNA
IGKV3D-20	2	mRNA
IGLJ3	2	mRNA
IGLV2-11	2	mRNA
IGLV2-8	2	mRNA
IGLV8-61	2	mRNA
IL2	2	mRNA
IL22	2	mRNA
IL24	2	mRNA
IL2RG	2	mRNA
IL9R	2	mRNA
KLRC1	2	mRNA
LMBR1L	2	mRNA
NR1I3	2	mRNA
PDCD1	2	mRNA
PPP3CB	2	mRNA
PTGFR	2	mRNA
RAC2	2	mRNA
RXFP2	2	mRNA
S100A2	2	mRNA
SP1	2	mRNA
TFR2	2	mRNA
TGFBR2	2	mRNA
TRAV12-2	2	mRNA
TRAV12-3	2	mRNA
TRAV13-1	2	mRNA
TRAV3	2	mRNA
TRAV35	2	mRNA
TRAV41	2	mRNA
TRBJ2-2	2	mRNA
TRBV10-3	2	mRNA
TRBV11-2	2	mRNA
TRBV12-3	2	mRNA
TRBV24-1	2	mRNA
TRBV4-1	2	mRNA
TRBV9	2	mRNA
TRGV4	2	mRNA
XCL2	2	mRNA
ACVR2B	1	mRNA
ADRB2	1	mRNA
AGRP	1	mRNA
APOH	1	mRNA
AZU1	1	mRNA
BACH2	1	mRNA
C5AR1	1	mRNA
CCL18	1	mRNA
CCL23	1	mRNA
CCL5	1	mRNA
CCL8	1	mRNA
CCR8	1	mRNA
CD8B	1	mRNA
CETP	1	mRNA
CSF1R	1	mRNA
CXCL9	1	mRNA
EBI3	1	mRNA
EED	1	mRNA
ELANE	1	mRNA
ELN	1	mRNA
EPO	1	mRNA
EPOR	1	mRNA
FASLG	1	mRNA
FLT4	1	mRNA
FPR1	1	mRNA
GPR17	1	mRNA
GZMB	1	mRNA
HCST	1	mRNA
HLA-DPB1	1	mRNA
HNF4A	1	mRNA
IFI30	1	mRNA
IFNAR1	1	mRNA
IGHD1-1	1	mRNA
IGHD2-2	1	mRNA
IGHD3-9	1	mRNA
IGHV1-18	1	mRNA
IGHV1-46	1	mRNA
IGHV3-49	1	mRNA
IGHV4-34	1	mRNA
IGHV4-61	1	mRNA
IGKV1-13	1	mRNA
IGKV1-33	1	mRNA
IGKV1D-33	1	mRNA
IGKV2-30	1	mRNA
IGKV6-21	1	mRNA
IGLV3-10	1	mRNA
IGLV3-9	1	mRNA
IGLV9-49	1	mRNA
IL17D	1	mRNA
IL27	1	mRNA
INHBA	1	mRNA
IRF1	1	mRNA
ITGB2	1	mRNA
KNG1	1	mRNA
LBP	1	mRNA
LCN10	1	mRNA
LILRB3	1	mRNA
LTB4R	1	mRNA
MARCO	1	mRNA
MAVS	1	mRNA
MC2R	1	mRNA
NCR1	1	mRNA
NOX4	1	mRNA
NPPA	1	mRNA
NR3C1	1	mRNA
OSTN	1	mRNA
PDGFRB	1	mRNA
PLCG1	1	mRNA
PLXNB1	1	mRNA
PRF1	1	mRNA
PRLR	1	mRNA
PTAFR	1	mRNA
PTGER4	1	mRNA
PTPN6	1	mRNA
RBP4	1	mRNA
SEMA6A	1	mRNA
SH3BP2	1	mRNA
SLC11A1	1	mRNA
SLC29A3	1	mRNA
SPP1	1	mRNA
STAT1	1	mRNA
SYTL1	1	mRNA
TANK	1	mRNA
TMSB15B	1	mRNA
TNFRSF14	1	mRNA
TNFRSF4	1	mRNA
TNFSF12	1	mRNA
TNFSF4	1	mRNA
TRAV10	1	mRNA
TRAV39	1	mRNA
TRBV12-4	1	mRNA
TRBV29-1	1	mRNA
TRDV1	1	mRNA
TRGV5	1	mRNA
VEGFC	1	mRNA
XCR1	1	mRNA
ZC3HAV1L	1	mRNA
