# Supplementary material for: Construction of immune-related and prognostic lncRNA clusters and identification of their immune and genomic alterations characteristics in lung adenocarcinoma samples
Source: Aging (Albany NY). 2020 May 23;12(10):9868–81. doi: 10.18632/aging.103251 (PMC7288974; doi:10.18632/aging.103251)
Supplement: Supplementary Table 2 [file aging-12-103251-s002..xlsx]

## Sheet: new_clinic_gene
gene	P	HR	X006af4ef.77ce.4652.8f61.9c475caa9b89	X00c464e4.0169.41f8.a028.b847a78b1637	X015abfd3.b82c.4b5d.8e97.e9dc868ea7e9	X01849baf.6dfb.4dd6.a207.d29e2bcc95d9	X01fd8c86.0fb1.4fe6.b0c0.a1c8bcc1e616	X02145fba.e5e7.41c3.a671.1e371aac8498	X03418695.e200.4957.9453.e34acffe3c67	X0394f36a.f54b.41bc.9fb5.f7eb5b08d639	X049c9590.0edd.4934.93b6.34a8b9f6acdb	X04c48702.a9ec.4c1e.99ba.805adc04c93b	X051db44c.1f20.4100.a3be.e077754854b8	X05284daa.4c27.4022.81c9.f83f3ffdb70c	X052bb42e.4e27.4236.90e8.a892e4d5b1d4	X0610198f.6d5a.43fb.9a91.48746aceb876	X062b40e1.2f4e.466d.a85c.d5c721bec650	X06c7212f.ce42.4f2e.affd.2576b724ccfc	X06dbc523.8c42.4cac.9e51.b956657ad143	X07b6829b.4da3.4294.b9a9.e03acea85e76	X07bbc2e0.c3be.41fd.b6e1.07c0f42bef31	X085a3bcb.dd79.4df9.9c1c.df0472c36284	X08623239.fbc4.4b18.936e.898c30b5beba	X096e538f.8902.4343.b78f.16b4d737e89c	X09d93428.e1ad.4a00.a849.689a05db66fd	X0a299310.bd1c.4393.9b3f.4e397c8d90ac	X0a5d1b6d.381b.4dfa.ac4e.af4f7152791b	X0aaf1076.c99d.408e.9220.dc307355b84e	X0af09c09.7128.47b4.b060.1453a3e53bc1	X0d443140.d0b1.4302.81cd.d3ca240f2004	X0d8e0de7.ddfa.42eb.9ddf.a369540c39ed	X0de55b27.1a00.4df7.9409.52be8b7d6f8b	X0e1faad5.a63e.4a6e.bc6c.8e28eb4f152d	X0e51d887.100b.4a8b.bc32.34bb48cf9ae8	X0f893b0a.16b6.4612.b739.e27f3a837dac	X0f993efd.6fd6.4294.a4ed.0b7690b75899	X0ff2e2d1.430f.4171.a8a0.222bc22c9c9c	X10a0510b.6e4f.45dd.ba76.09d144dcde48	X10b6df33.8f32.4ed9.b1b1.8867be485a2f	X11143692.2466.49e7.beeb.32f8b4cf5c50	X114ee5ba.5efa.4381.aebe.41b90eeccd81	X116cebc0.53b8.442e.841d.a8406f28eb7a	X12dc3992.3bda.41eb.9a83.fbca93d2a942	X1389d3ab.0d46.4500.9194.e7db3a9f7923	X139c706f.d38b.4eba.bed9.703f0d0dfb8f	X13d52449.aa61.4459.9730.fb2a3bc6e343	X13f2b3e6.3c45.4232.aa3b.2b40c7f94947	X14d75c66.833b.461f.9fb5.4453ba74a857	X1516b16d.cd89.410c.9cfd.db33b2c14ab3
ENSG00000243766	0	5.48	0	0	0.0084232	0	0	0	0	0	0.0087851	0	0	0.0510786	0	0	0.00439523	0	0.00646707	0	0	0	0	0	0	0	0.00509735	0	0.0028311	0	0	0	0.00762124	0.0121311	0	0	0.00977478	0.00493588	0.00414049	0	0.00218988	0	0.00204974	0	0.0218279	0.00309136	0	0.0120733	0
ENSG00000177822	0.001	2.07	0.103261	0.0330474	0.0380569	0.00843768	0.0818934	0.0233438	0.11772	0.00382475	0.0317536	0.00437693	0.0286676	0.0153852	0	0.0207534	0.00794324	0.0031649	0.105188	0.227551	0.00606543	0.0383929	0.0284108	0.0126021	0.0183866	0.00348222	0	0.0550578	0.010233	0.0764098	0.136423	0.0200638	0.144621	0.892297	0.0379581	0.0213533	0.0294423	0.0401415	0.02619	0.00272135	0.0989409	0.0490899	1.2243	0.0128537	0.0295862	0.159225	0.0161311	0.152735	0.0121782
ENSG00000227544	0.001	0.03	0.0321909	0.0128779	0.697012	0.07398	0.0106374	0.177798	0.313868	0.0894258	0.27841	0.0383761	0.111712	0.049961	0.164565	0.141526	0.0154766	0.345324	0.011386	0.382903	0.129997	0.061204	0.0922595	0.00818465	0.047766	0.0882019	0.0269234	0.0107275	0.0647983	0.117535	0.135731	0.021718	0.0805085	0.00427163	0.00821751	0.0762754	0.0745752	0.165114	0.0291593	0.037116	0.0539775	0.167382	0.234572	0.137743	0.0384305	0.0435416	0.0377159	0.552666	0.023728
ENSG00000233093	0.001	0.36	0.179312	2.19982	0.671871	0.81807	0.0632034	0.153547	0.313802	0.265667	1.03387	0.120342	0.199124	0.118739	0.541272	0.840892	0.0344835	0.0457986	0.135303	1.16746	0.93038	0.36365	0.054817	0.303937	0.0886896	0.0604686	0.106646	0.0637384	0.288755	0.651788	0.109208	0.038712	0.358762	0.260149	0.0610315	0.205999	0.451617	0.632513	0.0541415	0.1969	0.183265	1.3497	0.144734	0.548711	0.808701	0.614429	0.130721	0.599912	0.158605
ENSG00000238078	0.001	0.16	0.26217	0.190692	0.548997	0.146063	0.535554	0.159191	0.411139	0.0662095	0.320647	0.012628	0.0661678	0.0591846	0.104436	0.119753	0.068752	0.0547869	0.0674404	0.417783	0.314993	0.402796	0.027323	0.0969566	0.0707304	0.18084	0.0265783	0	0.147617	0.324878	0.200986	0.192956	0.238429	0.0253012	0.0973459	0	0.424725	0.257364	0.0431781	0	0.262621	0.247854	0.0641257	0.129797	0.113814	0.0805938	0.111697	0.125903	0.0702714
ENSG00000244968	0.001	0.45	0.22937	0.0719678	0.464112	1.43324	0.29129	0.506052	0.273226	0.10828	0.968104	0.21923	0.661756	0.0390888	0.354729	0.395457	1.01627	1.08208	0.712661	1.23885	0.508539	0.37624	0.855878	0.48484	0.353694	0.128916	0.180553	0.641466	0.272985	0.306524	0.404549	0.308281	0.38993	0.16949	1.0195	0.271258	0.577053	0.310815	0.0162956	0.133342	0.312425	0.354119	0.496125	1.0322	0.164655	0.240289	0.548012	1.52052	0.265206
ENSG00000245954	0.001	0.25	0.205223	0.273664	0.378177	0.395942	0.105491	0.0234314	0.171023	0.105575	0.635463	0.0302043	0.269047	0.0990922	0.149876	1.26029	0.0548147	0.069889	0.338744	0.171304	0.117198	0.240856	0.026141	0.115953	0.0169176	0.0768962	0.0762853	0.0607908	0.169478	0.566142	0.0240364	0.0184609	0.361181	0.018155	0.104776	0.0884127	0.121905	0.775623	0.0413102	0.0976532	0.174789	0.304883	0.122703	0.221752	0.0181483	0.185057	0.0356216	0.210799	0.100847
ENSG00000260963	0.001	1.32	0	2.58147	0	0.041194	0	0.0207214	0	0	0	0.0320532	0	0	0.206177	0	0	0.030903	0	0	0	0.06816	0.0231176	0	0	2.5331	0	0.02688	0.0249794	0.0589017	0	0	0	0	0.123545	0.521248	0.0287483	0	0	0.039858	0.0193218	0	0.0994691	0	0.048148	0.0681893	0.0315018	0	0.267551
ENSG00000262420	0.001	0.11	0.0618005	0.197785	0.284709	0.171335	0.140036	0.12701	0.112568	0.0654022	0.101808	0.0280666	0.159317	0.054809	0.141848	0.121989	0.0933813	0.372067	0.0374726	0.884332	0.207435	0.335715	0.404848	0.15264	0.157203	0.00744312	0.0984532	0.0941473	0.103895	0.12894	0.217148	0.0762414	0.191361	0.0702919	0.0360596	0.136926	0.0377592	0.181136	0.111961	0.0523511	0.114201	0.104928	0.190031	0.39151	0.0421597	0.0597083	0.137919	1.16595	0.0390457
ENSG00000278133	0.001	0.96	4.79183	11.3562	17.6604	15.0549	8.29808	13.1358	12.2604	22.0737	20.1095	3.61553	8.46187	5.83665	13.4222	14.0955	4.9867	26.2131	10.8558	30.3784	16.4783	6.97071	12.2036	13.5405	22.8159	18.5627	4.63341	13.6642	11.8904	20.7882	13.0647	26.4686	10.5178	5.81128	10.622	10.4525	11.0686	17.8155	2.39005	4.97545	6.42211	6.57816	23.8133	45.5382	8.49647	5.2713	15.1135	23.3106	5.81226
ENSG00000242258	0.002	0.57	0.506929	1.58857	2.52026	0.453058	0.26523	0.146506	0.182182	0.312942	1.96887	0.0783392	0.307859	0.131128	1.34203	1.55213	0.0812399	0.161846	0.567791	0.687608	1.02357	0.267727	0.423752	1.09555	0.548479	0.124651	0.800849	0.0703882	0.438256	0.91516	0.230071	0.336306	0.457822	0.818426	0.22646	0.536879	0.406516	0.832502	0.181762	0.278327	0.349113	0.282414	0.426225	0.59158	0.605188	1.62133	0.371209	1.89684	0.140122
ENSG00000244040	0.002	1.43	0.0621523	0.0198911	0.0515393	0.133314	0.0492915	0.0447064	0.0419537	0	0.238905	0.0461031	0.00862747	0.00771694	0.0635465	0.0624571	0.0119525	0.347652	0.0263802	0.0155639	0	0.0315118	0.0142503	0.366616	0.101446	0.0104797	0.0485167	0.0248543	0.046194	0.0544629	0.05678	0.0067091	0.0310882	0.0329896	0.0190391	0.0963935	0.070885	0.0604026	0	0.00818986	0.0267985	0.0738677	0.0195095	0.0967079	0.0840926	0.0714573	0.0388371	0.0164162	0.0641377
ENSG00000246430	0.002	0.33	0.193758	0.516749	1.46539	0.189659	0.074698	0.518492	0.339083	0.313982	0.434454	0.0941056	0.302578	0.0501193	0.672139	0.243385	0.0310514	0.0123721	0.114221	0.748016	0.640189	0.313812	0.0832967	0.0328423	0.263546	0.313088	0.0630204	0.0753303	0.250014	0.251535	0.255302	0.135078	0.0807637	0.0557072	0.074192	0.0626049	0.086321	1.55176	0.0146258	0.0425527	0.34423	0.407787	0.0325822	0.100494	0.379098	0.0655193	0.0252236	0.938246	0.142819
ENSG00000269044	0.002	0.87	1.44759	1.04613	6.84101	1.41498	3.08615	2.04733	5.01998	3.25747	7.06014	0.783487	2.44156	1.85533	4.56978	4.79032	0.823188	8.19379	2.73076	6.47042	4.50294	0.802337	1.87366	3.40352	5.65867	2.06027	1.8573	5.53985	3.23929	6.45615	3.51126	3.18405	4.38598	0.84272	0.619862	2.26656	2.26345	2.60526	1.11387	3.85603	2.72933	0.971225	2.74313	5.72795	0.495536	1.00006	3.74467	6.20807	1.30796
ENSG00000274712	0.002	0.73	0.903397	1.13453	1.8544	4.21655	0.98249	0.757924	0.78906	0.423565	2.5055	0.442303	1.25402	2.15816	1.78719	2.21211	2.77093	0.96385	2.00619	6.01357	0.839631	0.734394	1.32407	2.12828	1.03506	0.279583	2.14238	1.37189	1.17573	1.91505	0.835756	0.518451	2.17357	1.72381	1.29611	1.08383	1.68733	1.69172	0.548998	1.69521	1.36415	1.46102	1.24609	2.61561	0.691699	1.50809	1.6167	5.25554	0.370879
ENSG00000279261	0.002	0	0	0	0.0260165	0.00961363	0.0124409	0.0531944	0	0	0.0180895	0	0.0130652	0	0	0.0118229	0.00905028	0.0937556	0	0.117847	0.027643	0	0.0107901	0.00957227	0	0	0.020992	0.0125462	0.0116591	0	0.00661429	0	0.031386	0	0.00961071	0	0.00670913	0.0203271	0	0	0.00901841	0.0139829	0	0.0366128	0.00749101	0	0.0147034	0.0248602	0
ENSG00000228401	0.003	0.59	0.24698	1.18565	2.88246	0.46249	0.0544094	1.417	0.277858	0.724224	0.712019	0.34896	0.228558	0.0511091	1.44297	0.517066	0	0.189246	0.232954	0.103079	1.2694	1.14786	0.0943796	0.334909	0.610796	0.347034	0.229518	0.43896	0.535398	0.681335	0.347126	0.0888685	0.0686322	0.196641	0.0840635	0.957619	0.410786	0.933439	0.0745734	0.325448	0.157765	1.34537	0.738348	0.640494	0.753512	0.389744	0.128609	0.108724	0.910248
ENSG00000231113	0.003	0.66	0.846335	0.960322	2.19761	1.35169	1.58649	1.79469	1.81196	0.897694	2.15894	0.54626	1.45249	0.554071	1.77559	1.56567	0.384704	5.58886	1.43689	2.00375	1.60437	0.65015	0.45866	0.923332	1.27865	1.37514	1.69883	3.1383	0.914951	2.69683	1.73019	0.739174	1.69333	0.906615	0.942753	1.07395	0.767812	1.16314	1.0454	0.932731	1.74719	0.525793	1.89759	1.69998	0.318423	0.988653	1.08174	2.60121	0.204164
ENSG00000260979	0.003	0.16	0	0.25777	0.148422	0.164535	0.283897	0.30347	0.16109	0.0994435	0.309597	0.14225	0.223607	0	0	0.202346	0	0.0822873	0.151938	0.268924	0.0788506	0.453735	0.0615567	0.163827	0.159351	0.0905377	0.0598789	0.14315	0.133029	0.104561	0.113202	0.202868	0.0895272	0.0855026	0.219313	0.0462654	0.114825	0.115964	0	0.070755	0.128623	0.478626	0.192627	0.459521	0.128207	0.108943	0.0838818	0	0.0791582
ENSG00000265148	0.003	0.32	0.178279	0.417733	0.621853	0.351184	0.361888	0.248623	0.310403	0.100231	0.868839	0.0809653	0.273987	0.316221	0.297597	0.551857	0.122446	0.136605	0.279257	1.2596	0.317899	0.269015	0.0729929	0.563363	0.349567	0.0858863	0.262712	0.0678979	0.244501	0.291368	0.501136	0.0927862	0.392791	0.236571	0.0780173	0.104235	0.204236	0.426276	0.0807447	0.155215	0.353844	0.236478	0.171311	0.847059	0.172295	0.684669	0.174065	2.16945	0.206502
ENSG00000178722	0.004	0	0.0113421	0.0181495	0.0418014	0.0231697	0.0224878	0.0145686	0.00850673	0	0.032698	0	0.0236162	0.00704125	0.0496992	0.0213707	0.005453	0.00869075	0.00802345	0.0426035	0.0333111	0.0047921	0	0	0.0168298	0	0.0126482	0	0.00702488	0.0110432	0.00797053	0.018365	0	0.00903033	0.00579067	0	0.0040424	0.0183713	0	0.00747277	0.0135845	0.0505499	0.0076291	0	0.0315945	0.0153413	0.00442957	0.119831	0
ENSG00000178734	0.004	0.2	0.0392939	0.0628778	0.524967	0.963241	0.0259692	0.0403775	0.0147355	0.0909648	0.490881	0.187375	0.24545	0	0.200877	0.123396	0.0566747	0.180651	0.111187	0.147597	0.173106	0.0332039	0.112617	0.0399624	0.145764	0.198764	0.197185	0.026189	0.109518	0.248679	0.441814	0.0636243	0.0327576	0.0417134	0.300922	0.118498	0	0.106077	0.0177966	0.336556	0.291788	0.204315	0.0440509	0.0917109	0	0.0132873	0.0767299	0.15568	0.0289636
ENSG00000215483	0.004	2.39	0.00921172	0	0.110338	0.00940892	0.036528	0.0662603	0.138179	0.11089	0.106226	0.0341652	0.0767217	0.0228749	0.0538192	0.0462845	0.0177151	0.0141168	0.0521315	0.461352	0	0.00778404	0.0211207	0.12179	0.0820121	0.13979	0.020545	0	0.0456434	0.152472	0.0323673	0.0894933	0.092153	0.0195579	0	0.00793705	0.0328313	0.109418	0.0417209	0.0364151	0.0661978	0.0547404	0.148708	0.0716664	0.014663	0.00622991	0.043171	0.340632	0
ENSG00000233968	0.004	0.38	0.202525	0.238795	0.766053	0.0653244	0.0986249	0.0876254	0.111924	0.0394815	0.839938	0.0847153	0.133166	0.039704	0.264674	0.281177	0.163991	0.179686	0.512747	1.14777	1.9566	0.810648	0.354373	0.314376	0.173982	0.0629049	0.10698	0.0994598	0.871458	0.300971	1.03371	0.287655	0.142178	0.0282889	0.0217682	0.284712	0.167157	0.161142	0.0386215	0.105343	0.357466	0.665092	0.195974	0.0995133	0.432661	0.677632	0.0416289	1.29509	0.408561
ENSG00000260037	0.004	0.14	0.153536	0.0409478	0.400817	0.104548	0.169118	0.197212	0.172731	0.165869	0.491808	0.0813494	0.213125	0.15886	0.149505	0.192861	0.0246054	0.0980377	0.18102	0.256318	0.300618	0.0432466	0.117343	0.416394	0.607524	0.0431469	0.14268	0.10233	0.126793	0.0996595	0.48553	0.151924	0.341323	0.0543298	0.0522582	0.13229	0.0364809	0.0828963	0.231793	0.118017	0.0858158	0.0760318	0.0688493	0.258807	0.0203662	0.103836	0.119925	0.337944	0.188619
ENSG00000265206	0.004	0.86	0.0705476	1.58046	14.0533	1.28263	0.764645	0.21023	0.836007	0.535679	2.65752	0.134564	0.391713	0.280298	2.12269	12.7609	0.162805	1.08113	0.918268	1.2013	0.683744	0.0119228	0.258803	1.6215	1.33992	0.0832668	0.330421	0.300924	2.36826	1.81337	0.733735	0.350306	3.12883	0.636578	0.216108	0.1702	2.12213	0.700852	0.0766844	1.98007	0.57457	1.21576	1.90445	3.9298	0.0898368	2.04205	1.30045	3.87581	0.166403
ENSG00000178977	0.005	0.78	1.18935	6.6964	1.56259	4.00437	1.84864	4.17001	2.28789	1.67239	1.77788	1.55207	4.8	0.765704	1.54416	2.01964	0.23296	1.26573	0.856933	1.02035	3.94586	2.81963	0.669112	1.28798	1.4053	4.36359	0.982451	2.09916	1.27548	1.11511	4.80587	1.69397	2.24007	2.39657	1.92286	0.948863	0.996934	1.47456	0.299261	0.935975	1.10266	6.18421	1.12099	2.57885	2.12982	1.74278	1.81496	0.959877	2.37026
ENSG00000230910	0.005	0.09	0.00777747	0.0373364	0.336802	0.0476638	0.0205604	0.0519477	0.0816652	0.0720189	0.313903	0.00412082	0.0215921	0	0.0567995	0.0293086	0.0224354	0.0178782	0.0220073	0.4869	0.0685262	0.0591487	0	0.0316392	0.115405	0.0393415	0.0260193	0	0.0578052	0.401343	0.163966	0.0419774	0	0.0165127	0.0238247	0.0603113	0.0665269	0.0755853	0.00704501	0.0153727	0.0558909	0.0231087	0.0488266	0.0726096	0	0	0.0121498	0.328681	0
ENSG00000235997	0.005	0.76	0.699024	0.820287	4.45837	0.404593	2.97722	1.26102	0.297091	0.409952	2.25406	0.251029	0.679229	0.106079	2.43907	0.624402	0.141898	0.119027	0.648337	0.388992	2.15565	1.28638	0.560955	0.229073	0.35727	1.65665	0.363776	0.42448	1.97714	1.01334	2.21055	0.557543	0.427347	0.0948195	0.1031	0.194073	0.647758	2.13029	0.0281419	0.163753	1.96469	1.17695	0.44581	0.634473	1.4774	0.147078	0.1638	0.861619	0.583953
ENSG00000254615	0.005	1.06	1.17952	0.387835	0.3573	0.445601	0.384432	0.672439	0.848305	0.613445	1.21112	0.676325	1.25602	0.22068	1.22722	0.994522	3.82201	1.78283	1.85169	0.44508	2.9422	0.873831	0.518656	2.16912	0.263731	0.177088	1.53157	1.67997	0.560426	2.42273	1.60102	1.01162	0.565744	0.643228	0.214483	0.863164	2.25744	0.191925	0.19027	2.50173	1.18437	6.0251	1.55056	0.76681	1.81324	0.863279	0.227172	0.426776	1.191
ENSG00000261485	0.005	0.54	0.237596	0.46167	1.09458	1.12674	0.58324	0.967873	0.878274	0.377164	1.10899	0.0449599	0.848084	0.25286	1.01632	0.596903	0.163186	0.364111	0.312143	1.52994	1.47038	0.358521	0.214013	0.880252	1.83831	0.38631	0.492062	0.746532	0.336362	0.462668	1.14492	0.448832	0.113185	0.522467	0.485216	0.146227	0.71374	0.329867	0.092237	0.491986	0.520357	0.428614	1.33941	0.633762	0.175592	0.413194	0.636285	2.59989	0.375284
ENSG00000267481	0.005	0.85	1.49368	1.79263	3.9223	2.66989	2.3692	2.30231	4.91058	2.09776	4.25828	0.804602	2.86821	1.94731	2.8362	3.40853	0.909627	3.92951	2.53593	18.0786	3.94818	0.420727	1.42697	2.43055	4.9499	1.46915	2.85943	2.52199	2.94501	3.49036	3.44641	0.591202	2.57345	0.924963	1.52519	1.60874	2.51983	4.51618	0.270602	3.73964	2.65964	1.22047	2.3778	4.74512	0.693468	0.521926	1.61393	12.4933	0.733997
ENSG00000274536	0.005	0.78	0.277915	1.47565	3.92246	0.387087	0.417438	0.525725	2.63393	0.608276	2.37932	0.0736253	0.894305	0.203901	2.65698	1.41226	0.5709	0.251668	0.303835	5.2512	0.630718	0.362938	0.564796	1.92711	0.693548	0.298201	1.00019	0.101033	1.3614	0.897869	2.29924	0.409089	0.821431	0.301732	0.374071	0.174152	0.720372	0.436511	0.228856	1.05702	0.611254	0.957121	0.63445	0.501227	0.351892	0.743274	0.690696	5.40531	0.167606
ENSG00000179818	0.006	0.49	0.273467	0.787306	1.17585	0.590871	0.435614	0.991936	1.06058	1.37977	1.02646	0.285453	0.695941	0.174124	1.16757	1.12301	0.31015	0.687726	0.540675	3.02309	1.30943	0.422666	0.688636	1.26461	1.23121	0.460116	0.397489	0.565483	0.474108	0.819262	0.835228	0.524164	0.757977	0.363502	0.653938	0.296043	0.763066	0.976756	0.360983	0.324161	0.826953	0.631972	1.04759	1.22016	0.694803	0.484496	0.672754	3.18555	0.325618
ENSG00000224660	0.006	0.86	0.327942	0.326382	5.12198	0.93136	1.0361	3.43356	2.20166	2.21829	4.25826	0.112307	1.59328	0.705115	3.65674	3.47636	0.8191	6.36175	1.33535	6.83014	1.05125	0.321049	0.861945	2.27364	3.85136	1.20031	1.95341	1.80187	1.33264	2.53104	1.87739	1.99449	1.60034	0.498852	0.383865	0.957959	1.30565	2.68615	0.30068	1.79177	1.52897	0.409959	4.39559	5.69079	0.0668429	0.416529	1.76495	8.39784	0.182769
ENSG00000261131	0.006	0.55	0.285707	0	1.11879	0.583646	0.377645	0.366983	0.374998	1.12439	1.37277	0.113534	0.0991487	0.177369	0.521636	0.538328	0.549445	0.32838	0.404222	1.43091	0.209777	0.18107	0.163768	0.435852	0.635913	0.24087	0.079652	0.380842	0.57511	1.66906	0.301167	0.192756	1.07182	0.113737	0	0.61543	0.509141	0.462773	0.0647	0.800016	0.239536	0.318339	1.02495	2.11164	0.113695	0.048306	0.948439	2.07525	0.105298
ENSG00000267904	0.006	0.82	0.923838	1.34393	2.631	0.257349	2.88629	0.819863	4.5353	1.16655	3.55111	0.155746	1.16581	0.625666	2.0854	2.10993	0.403782	3.24982	1.12882	8.41249	1.10997	0.354844	1.25165	1.96452	2.67934	2.26576	1.35802	0.895606	1.32645	1.55367	2.62638	0.883924	0.560119	0.490361	0.171514	0.651274	1.52658	2.26725	0.608606	1.74302	1.28755	0.24954	1.43112	2.54825	0.200529	0.283997	0.524799	7.43129	0.371435
ENSG00000231290	0.007	1.25	0.0649781	0.00742696	0.00855279	0.00474065	0.0736179	0.0262311	0.0208863	0.00429781	0.00892025	0.0368872	0.0837545	0.040339	0.00677915	0.0349804	0.0223142	0	0.0590991	0.441656	0.0204469	0.0862831	0.351172	0.155768	0.0206607	0	0.0103515	0.00618675	0.0977383	0.0225949	0.00652325	0.0275555	0.015477	0.0714426	0.0142176	0.0079981	0.129027	0.0300709	0.0168168	0.0122317	0.13119	1.17218	0.0603569	0.0361088	0.0258576	0.0156946	0.0181263	0.110331	0.0205267
ENSG00000255418	0.007	0.12	0.0246537	0.0394508	0.181724	0.0251815	0	0.0886677	0.166416	0.0913169	0.379063	0.0130626	0	0	0.0360097	0.0619367	0	0.623393	0.0697609	0.432158	0.0724069	0	0	0.175512	0.0731642	0.249417	0	0.032863	0.106888	0.264044	0.121276	0.0532255	0.0411055	0.0785153	0	0.0849691	0.210883	0.106488	0	0.0324864	0.0118112	0	0.198997	0.115082	0.0588648	0.0166734	0	0.846531	0
ENSG00000281501	0.007	0.46	0.152643	0.699083	0.761406	0.881699	0.431353	0.340748	0.343453	0.151094	0.869991	0.0278884	0.263031	0.352906	0.576601	0.66117	0.4302	0.47591	0.268089	2.35935	0.656998	0.16012	0.301707	0.219477	0.640438	0.275126	0.346311	0.329761	0.0815014	0.430485	0.114666	0.363634	0.570438	0.24865	0.472964	0.272112	0.390201	1.22769	0.205017	0.21501	0.42112	0.234588	0.835548	0.659293	0.155	0.512603	0.522133	1.54318	0.279343
ENSG00000259081	0.008	0.4	0.0721006	0.0769166	1.35078	0.171836	0.0317673	0.395141	0.270383	0.267059	0.739053	0.0254679	0.200168	0.149202	0.561661	0.483028	0.092438	0.773449	0.204018	0.662021	0.105878	0.0406174	0.440834	0.488848	0.356618	0.101309	0.187608	0.192217	0.238169	0.468003	0.118225	0.103773	0.320571	0.0510267	0.0736217	0.828315	0.291235	0.181665	0.0653103	0.253353	0.460563	0.0357046	0.722075	0.61703	0	0.146285	0.168951	1.58699	0
ENSG00000268001	0.008	0.83	1.99121	17.8508	2.56423	2.72367	2.43187	1.38203	3.9563	0.905749	1.90229	0.987155	4.38042	0.939769	2.89138	3.10092	0.537446	0.472891	1.36741	3.0326	3.21473	3.85718	0.73421	2.83038	0.777532	0.804999	1.27257	0.543265	2.83439	1.56459	1.48931	0.817035	2.77634	1.29796	1.03444	1.38458	1.70988	2.32621	1.36067	2.28626	3.14638	7.26569	1.23232	1.41325	5.6533	2.11055	0.600294	2.02993	1.5793
ENSG00000268388	0.008	0.71	0.860432	0.167383	7.17859	0.182663	0.619947	1.24996	0.131598	1.06546	0.551231	0.31823	0.173302	0.0209476	1.89254	1.01724	0.210893	0.455045	0.553775	0.481629	0.4955	0.179631	0.201149	0.504452	0.185252	2.36111	0.244583	0.503754	0.244517	0.542078	1.24489	0.311422	0.140648	0.379693	0.0344543	0.0901273	0.418507	1.53761	0.210896	0.311239	0.253798	0.10527	0.354065	0.388519	0.177244	0.139202	0.0210846	4.12642	0.243742
ENSG00000234572	0.009	0.01	0	0.0556741	0.138913	0.094765	0.0153293	0.0238344	0.00869821	0.0107391	0.133736	0.024579	0.0160985	0.0431985	0.169393	0.072839	0.0111515	0.0177727	0.0164081	1.21975	0.0170305	0.0391998	0.0265905	0.17692	0.0172086	0	0.0258657	0	0.050281	0.146792	0.0407497	0.0125189	0.0193364	0.00615573	0.0236841	0.109918	0.0330671	0.0751392	0.0105052	0.0229229	0.0333366	0.0344585	0.0832088	0.0451132	0.0184604	0	0.0452928	0.30632	0.0512907
ENSG00000235304	0.009	0.3	0.181044	0.517332	0.0834054	1.09631	0.0683723	0.0265767	0.0387961	0.0478989	0.223685	0.102776	0.23336	0.160563	0.11333	0.698491	0.0870419	0.0693618	0.256144	0.874344	0.11394	0.152985	0.08895	0.578677	0	0.0109023	0.0576837	0	0.168199	0.176273	0	0.0837559	0.582154	0.185328	0.0792274	0.0334269	0.119833	0.293246	0.0117139	0.136322	0.16108	0.806889	0.0811849	0.26158	0.174968	0.428542	0.0606049	0.580661	0.0381281
ENSG00000268505	0.009	0	0.0340599	0.00908374	0.162141	0.0115963	0.00750335	0.0466656	0	0.0315393	0.0327304	0	0	0	0.0580399	0.00713061	0.0109168	0.0173987	0.0240942	0.0142152	0.0250081	0	0	0.00577322	0	0.105287	0.0126607	0.0227006	0	0.00552705	0.0678166	0.00306386	0	0.0180785	0	0	0.0161856	0.0490386	0	0.0187004	0	0.00843333	0.00254555	0.0132491	0.00451797	0	0	0.0599747	0
ENSG00000281005	0.009	0.49	0.148642	0.564907	1.59211	1.06277	0.405227	0.701654	0.954579	0.49895	1.17843	0.118135	0.889807	0.276834	1.07197	0.945237	0.598506	1.03218	0.407457	1.65174	0.654831	0.494567	0.276906	0.680267	0.799529	0.297622	0.321158	0.173369	0.621429	0.895482	0.365598	0.441246	0.449196	0.557211	0.616596	0.312179	0.437061	0.601905	0.100982	0.171383	0.578596	0.386444	0.887341	1.55394	0.13309	0.389541	0.304768	1.17782	0.191737
ENSG00000173811	0.01	0.13	0.0211904	0.0847717	0.185482	0.10822	0.0840278	0.152423	0.182771	0.0294333	0.895982	0.022455	0.132366	0.0263103	0.355937	0.0665447	0.0203757	0.0730661	0.119922	0.39798	0.233382	0.0268593	0.0364391	0.0646527	0.361595	0.0446622	0.0236306	0.0706159	0.0262492	0.113476	0.067011	0.0914967	0.105993	0.0393665	0.0108187	0.0182581	0.0528669	0.0800871	0.00959736	0.160556	0.0609118	0.0629616	0.147286	0.0989155	0.0252977	0.0214966	0.0413788	0.363805	0
ENSG00000255310	0.01	0.74	0.437512	0.510886	1.69962	0.398566	1.34416	0.808024	2.67834	0.131395	2.65896	0.0501214	0.755043	0.0734084	2.41798	1.26253	0.14781	0.18121	0.719376	4.88577	0.312556	0.229816	0.0813349	1.50323	1.10539	4.2368	0.276913	0.189144	0.219713	0.61019	0.639843	0.114878	1.0252	0.194567	0.169038	1.33468	1.37389	4.07319	0.0535552	1.43349	0.708124	0.281071	0.662809	1.24193	0.254099	0.191929	0.267846	3.71665	0.871598
ENSG00000268845	0.01	0.02	0	0	0.246121	0	0.117693	0	0	0.0412256	0.17113	0	0.0617995	0.0552772	0.0650272	0.111847	0	0	0	0	0	0	0	0.4075	0.0660609	0.0375336	0	0	0.0827231	0.0433471	0	0	0	0	0	0.11508	0	0.0480745	0	0.0293324	0.149303	0	0	0.0346364	0	0.0602184	0.0695486	0.705547	0
ENSG00000269918	0.01	0.69	0.15938	0.163954	1.80415	0.767448	0.78248	0.666801	1.21245	0.147585	1.96919	0.144765	0.474082	0.127215	1.44665	1.10111	0.0766263	0.235524	0.57984	2.8223	0.167176	0.105819	0.156612	1.11149	0.929083	1.84276	0.0761717	0.151751	0.260889	0.919995	0.38401	0.153611	0.588417	0.0845969	0.0813713	1.29479	0.97379	1.99149	0.0824973	1.38011	0.430869	0.219865	0.362456	1.07168	0.0634244	0.123188	0.284548	2.79644	0.822357
ENSG00000270179	0.01	0.79	0.931449	0.573269	2.70669	0.914797	1.4206	0.717852	1.7465	0.663475	8.19353	0.37963	0.69621	0.934099	3.61053	1.80003	0.103343	2.41565	1.97674	5.11355	1.57824	0.514635	0.821398	1.53025	2.92371	1.57055	1.03871	1.43262	0.909739	1.29059	1.73712	2.35897	0.955703	0.855694	0.512131	0.308677	1.78756	0.967124	0.227158	1.22738	0.9783	0.212889	2.0081	3.20522	0.484715	0.751084	0.699561	6.05595	1.37315
ENSG00000272223	0.01	0.72	0.360361	0.360405	1.78466	0.598122	0.297702	1.94407	0.912184	0.750808	1.38518	0.310268	0.437696	0.335573	0.855318	1.18823	0.12994	4.86667	0.254922	1.128	1.19066	0.190319	0.36148	0.458115	0.935754	0.37976	0.653021	2.58191	0.753284	0.570154	1.13958	0.680743	0.450626	0.406459	0.551946	0.58218	0.417416	0.535053	0.448832	0.860667	0.517929	0.13384	0.525184	3.36429	0.143404	0.274177	2.07587	2.97443	0.199217
ENSG00000197989	0.011	0.94	1.15421	4.82381	13.2745	3.93896	2.47689	6.72553	4.12468	3.79735	5.80675	0.557586	2.6106	2.06533	8.02269	6.78864	2.89862	17.7816	2.27658	5.55961	4.01797	0.952373	5.91543	6.72543	5.51071	2.95356	3.09666	6.57045	3.79725	6.67663	3.14424	3.1258	4.02997	3.95332	2.07287	3.68548	3.4313	2.82995	3.27797	4.02593	4.97666	5.64846	5.26405	20.2834	0.972656	2.92493	8.87748	7.89049	0.870787
ENSG00000198106	0.011	0	0.00951763	0.0456902	0.100848	0.00972138	0.0314508	0.0317854	0.057107	0.0132199	0.329261	0.00252141	0.0198174	0.0236345	0.180721	0.059777	0.0183034	0.09116	0.0336642	0.0357505	0.0279529	0.0120638	0.0272776	0.0290387	0.0353065	0.0361079	0.00530683	0	0.0560015	0.111202	0.0167211	0.0256848	0.0793444	0.0126296	0.0194369	0.00820063	0.0237451	0.0770809	0.0129319	0.0125415	0.0227987	0.0282791	0.0618853	0.0222139	0.0113625	0.0128736	0.0260194	0.113125	0
ENSG00000226777	0.011	0.76	0.0417547	2.01561	2.21428	0.644467	4.03815	0.555397	0.208778	0.182583	1.25279	0.1733	1.25259	0.0288019	0.745405	7.00491	0.207438	0.325274	0.830334	3.1949	0.265702	0.813477	0.23402	0.158065	1.2357	0.0312906	0.227642	0.0309213	0.297407	2.72384	0.418949	0.147738	1.74046	0.032013	0.40267	0.203869	0.248029	0.746458	0.115568	0.0901725	1.48141	4.9901	1.33356	0.662329	0.563099	0.149038	0.248229	2.02804	0.102592
ENSG00000261460	0.011	0.44	0.0874002	0.198131	0.73147	0.238056	0.144406	0.456537	0.546263	0.343961	0.461938	0.0887573	0.798701	0.14469	0.617015	0.594675	0.196093	0.652953	0.298833	1.16727	0.385035	0.141554	0.392434	0.511101	0.464713	0.196491	0.357371	0.495137	0.356373	0.326205	0.455529	0.660416	0.412883	0.193295	0.245421	0.376531	0.36861	0.57413	0.23091	0.638222	0.478039	0.205585	0.489906	1.07095	0.144918	0.192104	0.955741	1.73137	0.161057
ENSG00000204929	0.012	0.02	0.0374232	0.0199615	0.0402279	0.0573365	0.0329772	0.0416599	0.0654921	0.0115512	0.0599375	0.0793134	0.017316	0.0387211	0.0911018	0.0391738	0.0239896	0.071688	0.0264735	0.203046	0.0549552	0.210821	0.157308	0.0634332	0.0925499	0.110426	0.0208664	0.00831408	0.0849885	0.036437	0.0175326	0.00673282	0.0207988	0.026485	0.127376	0.0591155	0.0755817	0.0673514	0.107346	0.0369847	0.119526	0.00926611	0.165018	0.0436724	0.0744618	0.0674918	0.0292308	0.23064	0.0367797
ENSG00000231131	0.012	1.06	0.01948	0.436405	0	0	0.0257485	0	0.0292206	0	0	0.0412852	0.0270405	0	0.0569057	9.42074	0	0	0.0275606	0.195124	0	0.0164609	0.133992	0	0	0	0	0	0.0361958	0.0568999	0	0.0210279	0	0.0310192	0	0	0.0694284	0	0.1941	0.051338	0.083993	0	0	0.0151553	0.0310078	1.67315	0	0.617429	0.0287175
ENSG00000272927	0.012	0.77	0.311099	0.448036	2.43644	2.70095	0.246725	0.65534	0.746653	0.345691	4.24517	0.197799	0.475026	0.463519	1.90846	2.26653	0.0897414	0.0953506	0.484161	1.55808	0.685262	0.420613	0.534967	1.26557	1.56951	0.131138	0.208154	0.331751	0.289026	0.78754	0.896349	0.285446	0.414959	0.247691	0.381194	0.375271	0.975727	0.403121	0.0845401	0.594409	0.298085	0.462174	1.85541	6.43805	0.17332	0.399754	0.558889	1.06821	0.550348
ENSG00000281103	0.012	0.67	0.449677	1.86555	1.64195	1.46864	0.946605	0.359394	0.532962	0.267318	1.28037	0.200018	0.81686	0.323967	1.14333	1.40865	0.362993	0.225453	0.69119	1.93238	0.69295	0.276778	0.229116	0.542018	0.444831	0.14509	0.390025	0.185003	0.460752	0.627011	0.382329	0.116858	1.01818	1.28771	0.113374	0.559654	0.530271	1.41476	0.301724	0.307245	0.734068	2.04538	0.440635	0.583075	0.751133	0.822244	0.281857	3.24059	0.163683
ENSG00000174403	0.013	0.01	0.0269979	0.0108005	0.186565	0.0137879	0	0.0104034	0.0404977	0.0187499	0.272413	0	0	0.0167605	0.0394336	0.0763041	0.01947	0.0103434	0.0286478	0.0507053	0.0297344	0.0228136	0.00773763	0.0411859	0.0500756	0.136566	0	0	0.041804	0.0854309	0.071147	0.0218574	0	0.00358254	0.00689187	0.0407086	0.0962227	0.094748	0	0.00889384	0.0194014	0.0200543	0.066586	0.0105021	0.0107437	0.00912937	0.00527193	0.0356547	0.00995012
ENSG00000228863	0.013	0.07	0.0278185	0.409537	0.225556	0.0511451	0.191205	0.0228685	0.108494	0.0154559	0.0748513	0.023583	0.108123	0.0552638	0.0812643	0.230628	0.0213991	0.0170525	0.0629727	1.36537	0.0326806	0.023507	0.00637824	0.113167	0.0743004	0.0187622	0.0186132	0.0074163	0.0310136	0.0866731	0.0430082	0.0330319	0.139146	0.0177188	0.0284054	0.0335567	0.0832837	0.0360471	0.00503972	0.0256596	0.0533095	0.0743897	0.0399184	0.0605991	0.168267	0.0263392	0.0782232	0.793548	0.0246061
ENSG00000237037	0.013	0.38	0.0880829	0.190282	0.348979	0.116959	0.186284	0.24212	0.475658	0.261006	0.448617	0.259018	0.427943	0.0984287	0.328071	0.381721	0.135514	0.73567	0.336476	1.12492	0.827825	0.353549	0.247398	0.694256	0.405172	0.219066	0.127694	0.18199	0.534644	0.437384	0.343542	0.537214	0.110146	0.128571	0.359765	0.212504	0.580779	0.380459	0.135639	0.208922	0.232095	0.189744	0.56088	1.89137	0.0665989	0.354445	0.199521	0.546734	0.220749
ENSG00000196167	0.014	0.93	0.585473	0.235268	4.11719	0.828628	0.152693	0.501799	1.658	1.69451	8.85559	0.329683	0.983993	0.0228186	3.75807	0.425429	0.148946	4.30709	1.41523	2.04467	2.27083	1.65503	0.508659	1.58871	1.49206	8.60356	5.04163	0.125988	3.53679	4.71373	1.33209	0.313164	0.503405	0.721859	1.13399	0.366468	2.04176	1.14535	0.0808583	0.40131	0.932034	0.315933	6.38811	10.6418	0.0605972	1.83241	10.6308	4.16767	0.189652
ENSG00000256862	0.015	0.1	0.0470317	0.3763	0.108335	0.168135	0	0.060411	0.0705491	0.0435511	0.180784	0.037379	0.130571	0.0291977	0.0686954	0	0.0226118	0.0180188	0.0665412	2.11995	0.103598	0.0993563	0.0539174	0.0717479	0.0348937	0.0991271	0	0.0313462	0.0291299	0	0.0661022	0.0253845	0.0392083	0.0374458	0.048024	0	0.033525	0.101573	0.0213012	0.0464806	0.0225321	0.524034	0.0843609	0.128066	0.037432	0.0795192	0.018368	0.869572	0.0346672
ENSG00000270820	0.015	0.71	0.584003	1.28964	1.75417	1.33617	0.694738	1.33224	0.832223	1.26543	1.90811	0.717875	0.810665	0.435065	1.92779	1.07103	0.393085	3.383	0.776681	4.41656	2.55564	0.523101	1.15155	1.84121	1.28252	1.51645	1.13318	1.49465	0.687252	0.648219	0.870054	1.05278	0.525807	0.570366	1.50274	0.714533	0.716014	1.009	1.10033	0.515596	1.09676	1.40552	1.4194	1.5357	0.594946	0.766228	1.20426	4.75097	0.843722
ENSG00000273729	0.015	0.41	0.0986291	0.0631303	0.739116	0.255209	0.278117	0.523637	0.384662	0.267901	0.846695	0.0731608	0.538508	0.277575	0.595446	0.982869	0.233932	0.594513	0.186056	1.25138	0.482782	0.0333372	0.195986	0.74896	0.800043	0.127498	0.278633	0.131471	0.17919	0.422531	0.549865	0.195188	0.372743	0.191954	0.315558	0.13597	0.356209	0.276907	0.494351	0.194947	0.412664	0.224672	0.884556	0.941253	0.167462	0.204556	0.498179	1.04203	0.11632
ENSG00000215386	0.016	0.47	0.166658	0.133343	0.314789	0.157459	0.115651	0.661469	0.968721	0.381953	1.29724	0.364247	0.104103	0.036212	0.273852	0.0471025	0.0240376	0.0351175	0.389054	4.96632	0.189668	0.714705	0.0429879	0.0466107	0.191652	0.281007	0.0929249	0.327674	0.467081	0.580101	0.228379	0.152916	0.0347339	0.013269	0.0638153	0.215395	0.885034	0.449907	0.109448	0.164705	0.0678667	0.25997	0.138257	0.612636	0.109429	0.0338134	0.117157	2.53111	0.0982753
ENSG00000255399	0.016	0.82	1.10721	0.59643	2.68676	0.587849	2.98496	1.5123	0.189106	1.42116	1.91729	0.348501	1.26303	0.224584	2.2737	0.881298	0.247713	0.66779	1.24854	1.40004	2.33423	1.9129	0.50898	0.691236	0.609993	2.83732	0.709042	1.13979	1.77892	2.99927	2.49602	1.01769	1.10581	0.474227	0.531702	0.236138	1.58238	2.69306	0.263146	0.386412	2.88594	1.09116	0.830778	0.614066	0.916113	0.263195	0.188378	1.56357	0.937333
ENSG00000234452	0.017	0.03	0.033229	0	0.061233	0.203642	0	0.0682907	0.0249222	0	0	0.0176061	0	0	0.0970696	0	0	0.17823	0	0.332842	1.95184	0	0	0	0.39445	0	0	0	0	0.0323532	0.0233513	0	0	0.0176375	0	0	0.0236861	0	0	0.0656791	0.0159195	0.0987311	0.0596028	0	0.0793396	0.0449456	0	0.526604	0
ENSG00000246090	0.017	0.55	0.0979688	0.146318	0.511511	0.18679	0.194242	0.219798	0.440869	0.193533	1.10463	0.186868	0.933813	0.36492	0.443595	0.225613	0.109903	1.73156	0.263355	2.5596	0.215798	0.284229	0.138518	0.773837	0.533022	0.0605691	0.291335	0.378713	0.440931	0.944331	0.273092	0.551681	0.294021	0.128268	0.150054	0.118177	0.307269	0.271527	0.0946586	0.466891	0.286305	0.184356	0.943068	0.950196	0.0805713	0.15239	0.624932	2.06149	0.129984
ENSG00000271797	0.017	0.26	0.315745	0.388657	0.492329	0.198464	0.0642077	0.0623948	0.510061	0.0224907	0.420121	0.205901	0.269718	0.0904696	0.461183	0.183054	0.116772	0.0930527	0.240542	0.425749	0.356665	0.26681	0.167064	0.395221	0.360396	0.327624	0.16251	0.323756	0.42121	0.165536	0.170682	0.170418	0.161984	0.257836	0.248005	0.292981	0.311633	0.288498	0.110004	0.192028	0.186177	0.25258	0.185154	0.151168	0.193306	0.180687	0.0379423	0.513216	0.322251
ENSG00000255389	0.018	0.46	0.236761	0.151546	0.645716	0.619084	0.751079	0.155706	0.696094	0.192931	1.27411	0.0953388	0.394383	0.17638	0.774632	0.321196	0.118383	0.261239	0.428766	1.87353	0.250329	0.464155	0.0868558	0.202263	0.351315	0.287432	0.528052	0.403966	0.451657	0.73767	0.272866	0.178902	0.236853	0.226206	0.125713	0.285599	0.303781	0.572684	0.0943641	0.243346	0.490011	0.323598	0.445913	0.139991	0.226123	0.108883	0.229315	1.85105	0.0977298
ENSG00000263958	0.018	3.05	0.0429363	0	0	0.131566	0.0567529	0	0	0.0397588	0.165041	0	0	0	0	0	0	0.0328995	0.121494	0	0	0.0725636	0	0	0.0637104	0	0.0478807	0	0.0265933	0.167219	0	0	0	0	0.0438421	0	0.244845	0	0	0.0848663	0.0411402	0	0	0	0.0341725	0	0	0	0
ENSG00000266904	0.018	0.55	0.301545	0.287825	0.838386	0.437684	0.412565	0.152212	1.26572	0.47028	2.01317	0.333556	0.447953	0.512341	0.927245	0.77085	0.16278	1.2323	0.486507	1.98715	0.761325	0.245869	0.27898	0.737096	1.09898	0.160561	0.483756	1.02251	0.353873	0.705665	1.17479	0.425442	0.423385	0.283608	0.221477	0.53787	0.550563	0.377031	0.253978	0.432203	0.681774	0.392965	0.770993	1.66689	0.159997	0.225402	0.533048	0.880306	0.155979
ENSG00000270696	0.018	1.07	6.60147	2.54115	5.04252	4.55775	3.81644	4.5246	4.33108	5.38375	5.14566	2.34341	1.9311	5.60556	4.08309	4.33574	4.51782	4.16331	2.87809	16.5969	2.1778	2.89453	2.37721	3.95086	6.17331	5.17821	5.40051	6.1405	3.56849	4.8941	3.6246	9.12359	3.34797	4.12396	3.88631	6.21948	4.23788	5.24362	6.9546	3.25125	4.72198	1.67679	3.4252	3.2061	2.19353	3.28409	5.29984	9.70616	3.81151
ENSG00000272374	0.018	0.48	0.0215236	0.0602733	0.565195	0.472663	0.248935	0.317934	0.613435	0.323874	1.82014	0.0114041	0.395873	0.173706	0.668051	0.459619	0.0620882	0.564859	0.928781	3.42255	0.197543	0.0227347	0.0925301	0.443267	0.758514	0.0952653	0.264024	0.186488	0.296614	0.445322	0.238226	0.119074	0.134575	0.111388	0.302193	0.106635	0.172601	0.319575	0.209588	0.31907	0.314503	0.0559577	0.986888	1.3731	0.0256955	0.116451	0.68508	1.89026	0.0634603
ENSG00000281649	0.018	0.96	11.6391	17.1024	11.6038	13.5932	9.4569	7.18111	14.8303	15.2512	13.3836	7.55911	15.5182	8.04018	11.1578	8.38739	16.1531	14.0129	11.0581	35.7174	14.1678	5.37632	15.4108	10.83	17.8215	9.72304	28.4197	5.87869	6.52321	9.36268	7.94064	11.8538	7.35905	13.4858	19.219	8.44698	7.515	15.2071	6.54488	5.10996	7.19248	13.2245	16.5538	5.83862	18.8955	13.3799	10.9751	36.104	3.27943
ENSG00000175611	0.019	0.5	0.202306	0.611487	0.584055	1.18931	0.32683	0.868497	1.07224	0.420461	0.708513	0.319187	1.04217	0.491209	0.984971	0.293653	0.345827	1.30557	0.585171	0.765537	0.739402	0.531848	0.211309	0.470933	0.560351	0.754241	0.185495	0.233714	0.545756	0.564659	0.625541	0.368822	0.284837	0.291123	0.408557	0.457084	0.970992	0.718478	0.329856	0.284352	0.258457	1.52946	1.55634	0.675037	0.304135	0.237154	0.660166	1.22306	0.106041
ENSG00000260372	0.019	0.12	0.0363202	0.0211343	0.240338	0.0370977	0	0.083126	0.00495287	0.00917246	2.07511	0.0104967	0.0825001	0.00409962	0.511209	0.0124426	0.0031749	0.01771	0.504521	0.818564	0.0678815	0.0502219	0.124913	0.00335801	0.298863	0.00556734	0.0147283	0.00440129	0.0327207	0.0160741	0.0301644	0.0213853	0.0110104	0.00525772	0.0505725	0.0483641	0.14357	0.024958	0.0269179	0.00870173	0	0.00981055	0.0133257	0.0282568	0.00525579	0.00446608	0.00515805	0.0610479	0
ENSG00000272341	0.019	0.81	0.993726	1.06974	1.5482	2.11304	1.58814	1.23	1.05021	0.828167	3.22943	0.598314	1.09099	3.54445	1.55701	2.08798	0.694924	1.73053	1.59766	12.2839	3.75429	0.839713	0.466041	1.89264	2.73458	1.18812	1.14846	2.02305	1.57227	2.34848	2.03151	0.507089	1.09955	1.29946	0.894773	0.583786	1.89321	1.75591	0.335507	0.892801	2.19862	1.28841	1.29228	2.74806	0.539247	0.592634	1.24896	7.15833	0.972199
ENSG00000226252	0.02	0.02	0.0113617	0.0272715	0.355928	0.0174074	0.0300357	0.0904818	0.0937363	0.105209	0.152855	0	0.0157714	0	0.389986	0.0713591	0.0109249	0.047882	0.00803737	0.469451	0.0250267	0.0192017	0.0195377	0.0346651	0.0168589	0.0478934	0.0253402	0.03029	0.0562965	0.0940296	0.0758513	0.0183968	0.0189436	0	0.00580072	0.00978955	0.0202471	0.0306719	0.0154376	0.0149715	0.00816483	0.0084396	0.106993	0.0839736	0	0.00768397	0.0133118	0.795256	0
ENSG00000260966	0.02	0.63	0.434972	0.121986	1.12795	0.361839	0.610507	1.02065	0.985435	0.323887	1.01697	0.078406	0.361031	0.161464	0.438835	0.591445	0.23284	2.10628	0.279153	3.48107	0.717767	0.431975	0.236475	0.574628	1.19105	0.559517	0.295038	0.669471	0.683238	0.750965	1.09979	0.341261	0.24673	0.0357027	0.128208	0.340009	0.300466	1.07013	0.227469	0.310219	0.380255	0.146562	0.526843	0.491908	0.0785172	0.169832	0.406301	4.08626	0.204932
ENSG00000228506	0.021	0.77	1.46974	2.48627	0.515882	3.0739	1.05461	1.41678	0.839871	0.207386	2.3405	0.237327	1.55442	0.886359	1.14492	1.07255	0.807563	0.890215	0.55451	7.18567	1.84996	1.70325	0.30489	1.89335	0.623101	0.460233	0.85852	0.914265	0.554854	0.91312	0.895134	1.0728	0.886855	0.668674	2.21539	0.735699	1.61638	1.48127	1.39472	0.700898	0.979075	0.66544	1.11728	1.64439	0.646148	2.09211	0.634132	6.65489	0.515881
ENSG00000260339	0.021	0.32	0.17136	0.0822628	0.189465	0.280045	0.101926	0.189292	0.102818	0.0555375	0.395211	0.0726348	0.368695	0.0957437	0.550641	0.430502	0.0823859	0.118173	0.193954	0.214556	0.641678	0.0868811	0.0392896	0.296268	0.076281	1.06184	0.0764373	0.034263	0.0689875	0.0333688	0.33116	0.323709	0.0428566	0.127338	0.0524926	0.0516768	0.128256	0.0740161	0.0310444	0.141127	0.0862006	0.0381864	0.295843	0.23997	0.0272767	0.133275	0.14054	0.429981	0.113679
ENSG00000270127	0.022	0.73	0.287919	0.153576	1.58286	0.0686193	0.824568	0.325446	1.20209	0.186628	2.96971	0.0355953	0.133222	0.643474	2.20083	3.09826	0.0738266	0.279446	1.77877	1.05746	0.338242	0.186527	0.451098	0.956538	0.925654	0.857663	0.331778	1.33048	0.772752	1.37362	0.222566	0.372957	0.576062	0.1732	0.156797	0.835198	0.171028	0.518174	0.25211	0.290869	0.216102	0.114064	0.29265	0.761596	0.0152768	0.0584161	0.427291	1.11537	0.26882
ENSG00000272140	0.022	0.71	0.173114	0.492473	1.80771	0.216113	0.991556	1.0278	1.03871	0.783701	1.21995	0.0305743	0.694207	0.406	0.842844	0.749008	0.332917	6.6913	0.380993	6.79157	0.536674	0.308821	0.529223	0.899858	1.68394	0.518921	0.729297	0.564074	0.428883	0.655479	0.946199	0.529464	0.897976	0.193983	0.137485	0.364612	0.342773	0.768506	0.418162	0.392862	0.589768	0.314333	1.14718	1.31688	0.199015	0.325215	0.886424	5.69015	0.198493
ENSG00000279456	0.022	0.28	0.028167	0.112682	0.402265	0.100695	0.223386	0.108539	0.602084	0.0652063	0.270676	0.014924	0.215045	0.0174864	0.30856	0.318434	0	0.0647482	0.219181	1.6223	0.186132	0.0952063	0.145309	0.171878	0.522441	0.14248	0.109937	0.0750923	0.226794	0.260535	0.108868	0.0760131	0.070445	0.149507	0.100665	0.0728083	0.200779	0.182494	0.0510287	0.129906	0.256393	0.0627682	0.246301	0.460188	0.0448356	0.104772	0.0110005	1.41355	0.062286
ENSG00000225880	0.023	0.7	0.156683	0.390014	1.12284	1.45812	0.207103	0.70663	0.208915	0.644835	1.03724	0.0368965	0.700816	0.389081	0.737419	0.568576	0.535677	1.58742	0.517248	2.04899	0.332346	0.205955	0.459035	1.02692	0.878303	0.20548	0.601835	0.789011	0.992008	1.47469	0.354791	0.35706	0.377347	0.0277218	1.19103	0.510008	0.670118	0.281986	0.173467	0.573508	0.68392	0.413816	1.06172	2.46505	0.152414	0.32967	1.98533	2.43709	0.153989
ENSG00000268926	0.023	0	0	0	0.096343	0.0194186	0	0.0195359	0.0213885	0	0	0	0.0131952	0	0.0138843	0.0119405	0	0	0	0.11902	0	0.00803254	0	0.00966752	0	0.112196	0	0	0.00588756	0	0.0868414	0.0102611	0	0	0	0	0.00677588	0.0513233	0	0	0.00910814	0	0.0298385	0.0147909	0	0.00642879	0.00742486	0.0251076	0.028027
ENSG00000251323	0.024	0.26	0.0698172	0.0223442	0.527491	0.0142624	0.0738271	0.107614	0.115201	0.142231	0.59041	0.0073984	0.0581487	0.0173373	0.0611858	0.350798	0.067133	2.37526	0.118534	0.769267	0.307575	0.0117993	0	0.056804	0.0828778	0.0588605	0.0778572	0.148904	0.0951333	0.135955	0.235504	0.060292	0.0931258	0.0592929	0.114064	0.0240625	0.109487	0.135704	0.0505936	0.0643991	0.18731	0.0414887	0.181585	0.108634	0.0111133	0.132209	0.119973	1.8072	0
ENSG00000261270	0.024	0.84	0.228898	2.9913	4.00715	0.935193	2.26917	4.17499	1.31619	0.777181	1.3931	0.262773	0.741388	0.142102	2.95327	2.97111	0.550245	0.555405	0.701672	15.5719	3.24928	0.902638	0.568555	2.05633	0.79251	1.15786	0.595601	0.508529	1.3232	2.00579	1.4477	0.247087	1.7174	0.587232	0.506409	1.70928	0.815812	1.7302	0.276455	1.28189	0.877292	2.49374	3.47278	4.60042	0.667984	0.645018	0.595965	10.0765	0.449924
ENSG00000273015	0.024	0.72	0.421799	0.648566	1.77384	0.842403	0.897034	1.55333	1.43156	0.445135	2.42748	0.289658	1.94624	0.617338	1.51096	1.28463	1.18276	1.69544	1.23354	6.17819	1.24573	0.673029	0.742888	1.59368	2.68534	1.22574	1.22717	1.01142	0.645093	1.20681	0.816385	1.3952	0.758276	0.552835	1.89363	0.57662	1.68809	1.78627	0.0875145	0.431606	1.36374	0.4726	2.2148	1.1403	0.375089	0.670928	0.990227	4.54352	0.687822
ENSG00000279694	0.024	2.98	0	0.0143879	0	0.0367354	0	0	0	0	0	0.00476399	0	0.0111638	0	0.0112943	0	0	0	0	0	0	0.0103077	0	0	0	0	0.443457	0.0111379	0.0262632	0.031593	0	0.0149914	0.009545	0.128535	0	0	0.0388367	0	0	0.00430762	0	0.0483835	0	0	0	0	0	0
ENSG00000236304	0.025	0.55	0.289413	0.154373	0.607392	0.0164227	0.17002	0.42957	0.458248	0.714654	0.33992	0.0340762	0.111594	0	1.31514	0.222164	0.0773018	0.308	0.272977	1.24816	0.0944438	0.0815195	0	0.245281	0.524873	0.25755	0.215161	0.150027	0.219087	0.579227	0.192084	0.0607465	0.13404	0.102411	0.213431	0.083122	0.424058	0.399329	0.0873858	0.0635604	0.192574	0.0477731	0.511911	0.187634	0.0255934	0.0761176	0.150705	1.44391	0.189624
ENSG00000270194	0.026	0.66	0.39349	0.460727	0.857749	0.872446	0.469369	0.517754	0.446285	0.328821	0.885379	0.772927	0.746043	1.16779	0.91117	0.663052	0.33222	0.779508	0.461666	1.94669	1.05701	0.470372	0.671146	0.868693	0.370262	0.817207	0.545828	1.25372	0.683588	0.401809	1.67262	0.476557	0.448048	0.433001	0.313593	0.562311	1.49136	0.590719	0.365126	0.935838	0.409215	0.926767	0.365813	1.25439	0.626348	0.616615	1.0345	3.11796	0.664975
ENSG00000272654	0.026	0.67	0.194031	1.34544	1.10245	2.44427	0.555682	0.58153	0.703377	0.314425	0.839057	0.265581	1.54869	0.240912	1.03915	0.649942	1.58585	1.48674	0.32027	1.86255	0.926022	0.724152	0.37073	1.28266	0.455857	0.368057	0.613062	1.05611	0.650954	0.897358	1.36353	0.55853	0.781816	0.266055	0.990622	0.738386	0.714593	0.541262	0.307576	0.596577	0.759149	1.96975	2.76252	2.22658	0.386067	0.590506	1.35137	1.49477	0.500572
ENSG00000278831	0.026	0.69	0.0946134	0	1.07516	0.0644258	0.0833729	0.761577	0.544039	0.467261	1.21227	0	0.262669	0.352421	0.69097	1.03001	0.0909758	2.02991	0.490821	6.87088	0.0463125	0.0532998	0.28924	0.449041	0.561563	0.372238	0.351696	3.27906	0.195334	0.706253	0.177303	0.868118	0.420667	0.368277	0	0.407606	0.067442	0.238389	0.0571353	0.0623364	0.513714	0.0468531	0.636406	0.809692	0	0.383923	0.665112	6.49744	0.0929864
ENSG00000184608	0.027	0.06	0	0	0.0442648	0	0	0	0.108097	0.144581	0.253916	0	0.0166719	0	0.210512	0.0150867	0	0	0.186918	0.15038	0	0.010149	0	0.0122148	0.0356431	0.0405024	0	0.0160097	0.0297555	0.0350818	0.0253207	0.0129648	0	0	0	0.0103485	0	3.26826	0	0.00791314	0	0.0535289	0.247747	0.205569	0.00955899	0.0081227	0.00938123	0.0634463	0.0177059
ENSG00000215022	0.027	0.52	0.0515235	0.106004	0.610364	0.338313	0.10702	0.344139	0.264984	0.252184	0.650734	0.0428989	0.245214	0.17364	0.580548	0.416059	0.240636	3.54751	0.291585	2.35928	0.281027	0.0497579	0.160324	0.441658	0.349497	0.0992862	0.311908	0.147171	0.15956	0.437158	0.196556	0.0953446	0.38044	0.179716	0.0450948	0.15855	0.173141	0.158962	0.0466712	0.39281	0.458419	0.131219	0.914277	0.343585	0.0995884	0.0796468	3.44377	1.24424	0.0542545
ENSG00000234336	0.027	0	0	0.0268982	0.0206504	0.0114461	0.00740617	0.00575765	0.0756438	0.0207538	0.0430753	0	0	0.00695694	0.0572881	0.0140765	0.0107754	0	0.0317095	0.0561244	0.0164561	0.108899	0	0.142461	0.0166282	0	0	0.00746886	0.0208223	0	0.00787508	0.0211692	0.0280265	0.0089222	0.0114427	0.00965558	0.03994	0.042353	0	0	0.0429498	0.0166482	0.0351762	0.0348734	0.0178378	0.0037894	0.00875306	0	0.0165203
ENSG00000269994	0.027	1.08	0.0683737	2.15175	0.0839976	0.0232791	0.105438	0.0117099	0.683752	0.179389	0.240918	0.132833	8.70015	0.099043	0.0832232	0.329231	0	0.00873178	0.161227	1.02731	0.0502026	0.134812	0	0.0347685	0.0169092	0.0288218	0.737058	0.0759507	0.0846966	0.0887624	0.0400408	0.123011	1.026	0.0241946	0.954155	0	0.0487379	0.246107	0.0103224	0.0525563	4.83708	0.0338591	2.1258	4.25553	0.507899	0.578016	0.489554	0.180595	1.22636
ENSG00000229228	0.029	0.77	0.153621	9.64859	0.77849	0.784549	2.08132	0.552503	0.288046	0.177816	0.442875	0.284882	1.75927	0	0.673146	2.41211	0.29543	0	0.869382	1.0579	0.281987	1.88228	0.132084	0.0390587	0.455897	0.0647564	0.21414	0	0.166509	1.53312	0.512791	0.165828	1.02454	0.0407701	0.745096	0.595638	0.355887	0.290299	0.0695768	0.050607	0.88317	5.76262	1.2572	0.29879	1.95625	0.233762	0.14999	2.13023	0.113235
ENSG00000251364	0.029	0.5	0.113318	0.120887	0.762765	0.32794	0.19971	0.174664	0.53591	0.0641249	0.683616	0.0300202	0.598608	0.0273578	1.08963	0.391441	0.0877743	0.197777	0.236032	1.072	0.323565	0.135653	0.0685626	0.108843	0.425033	0.185761	0.150939	0.130071	0.294388	0.300347	0.11945	0.304107	0.162695	0.0417692	0.14785	0.0433944	0.549717	0.622018	0.128307	0.209463	0.358909	0.252521	0.330295	1.04813	0.152819	0.306548	0.314706	2.40276	0.204177
ENSG00000255036	0.029	0	0.00322203	0	0.0831241	0.016455	0.0511063	0.00993267	0.0918299	0.0119343	0.266279	0.0119501	0.0134177	0.0160021	0.230602	0.0728513	0.0526686	0.106161	0.0364686	0.0726163	0.0378518	0.0217813	0.02955	0.0360453	0.0669335	0.0135819	0.0251515	0.0214745	0.0179605	0.0690166	0.0475493	0.00347806	0.0214885	0.0205226	0.01316	0.0194333	0.0689015	0.0347925	0.0116744	0.0191056	0.0200671	0.00478671	0.0577936	0.0576544	0	0.00435813	0.0276836	0.0340413	0
ENSG00000261269	0.029	0.8	1.29172	0.679156	3.75751	0.574868	1.17078	0.786923	2.29054	0.991073	2.09247	0.508415	1.07583	0.389499	4.13727	1.29805	0.532309	0.728185	0.8485	2.84188	0.880684	0.678302	0.306743	2.90889	0.479174	0.894538	0.637921	0.614941	0.851477	1.8416	0.959613	0.746978	1.67681	0.798265	0.518166	1.02553	1.65079	3.29779	0.208941	0.838895	0.800073	0.370093	1.27433	0.933163	0.374508	1.02335	0.410784	2.51011	1.02014
ENSG00000269985	0.029	0.73	0.0688011	0.275238	0.126784	0.702739	0	0.450703	0.0387015	0.191128	0.165289	1.46726	0.023876	0	0.602953	0.129635	0.033078	0.158155	0.438034	3.14427	0.85878	0.450569	0.0591554	0.279887	0.893283	0.116008	0.019181	0	0.681809	0.083735	0.157135	0.00928352	0.286783	0.0273891	1.42262	0.904032	0.588511	0.185734	0	0.963261	0.00824038	0.204425	0.624757	0.16058	0.629717	0.0232652	0.376178	3.67991	0.760703
ENSG00000271895	0.029	0.91	0.52708	0.801259	7.72169	2.93408	1.1147	7.14933	3.32067	2.66	7.74955	0.265305	2.52419	1.43975	3.84931	4.0387	0.405452	7.10811	2.27445	5.08158	3.01862	0.356312	0.725096	2.46582	4.65349	0.977599	1.23433	2.42393	1.95873	2.66858	2.29648	1.79223	2.19702	0.503581	0.83421	0.590389	1.52163	2.58967	0.477441	1.90998	1.80549	1.52693	5.64891	5.98693	0.230723	0.855517	2.28491	4.0373	0.233107
ENSG00000270540	0.03	0	0	0	0	0	0.039282	0	0.0222895	0.0137597	0	0	0	0	0	0	0.242897	0	0	0.0744203	0.0218206	0	0	0	0	0	0	0	0.0184067	0.0144677	0	0.00802005	0	0	0.0151728	0	0.021184	0	0	0.00979015	0.0142377	0	0.0199899	0.0231209	0	0.0200988	0.0232129	0.196239	0
ENSG00000246067	0.031	0.91	0.726823	4.59182	3.0701	2.15966	1.9339	2.26	1.75574	4.97346	2.88452	6.04658	2.22748	1.98067	1.6131	1.71926	3.21303	4.86041	1.3889	18.0353	2.12079	3.1985	3.12733	3.66715	4.03382	1.04249	1.43157	3.17076	2.64255	2.10463	1.5522	1.43669	0.818387	3.4721	5.40715	2.10647	2.73176	2.43608	0.983285	1.86573	2.64096	2.67842	5.28678	5.47103	1.29968	3.25574	9.85019	19.7211	2.04557
ENSG00000234883	0.032	0.87	0.644849	4.9989	1.92769	5.59124	0.549297	0.404942	1.81636	0.371546	2.12068	0.539075	1.47199	1.06754	1.23491	2.44805	0.57872	0.735675	0.81097	11.5548	1.64137	1.05349	0.854254	1.66141	0.999377	0.10873	0.575286	0.305626	1.36683	1.172	0.433021	0.510466	3.29718	0.965984	0.409705	0.950725	0.919318	1.85688	0.324511	0.934696	2.49896	7.42982	0.591186	0.8027	3.21623	1.57001	0.817087	10.1059	0.464758
ENSG00000254102	0.032	0.07	0.0318998	0.0638073	0.198395	0.0570197	0.0843298	0.0409744	0.0538321	0.0147695	0.122619	0.0295782	0.0442807	0.00990184	0.128132	0.0500879	0	0.0122215	0.169246	0.439352	0.0585552	0.134779	0.018285	0.0729957	0.0355005	0.00672341	0.675892	0.0212609	0.0493941	0.232943	0.0784605	0.0774778	0.0930772	0.021165	0.0325728	0.00687141	0.0852701	0.258348	0.0144478	0.0262716	0.068772	0.201411	0.0643711	0	0.0571245	0.0161804	0.0498331	0.231706	0.0470269
ENSG00000247193	0.033	0.01	0.0128448	0.0616625	0.0236699	0.0524791	0.0169782	0	0.00963381	0	0.246869	0.0544456	0.0178301	0	0.131329	0.0484043	0	0	0.090865	0.225158	0.0188623	0.010854	0.0294507	0.0130633	0.133417	0	0.0286479	0	0.00795563	0.0750378	0	0.00693274	0.0856653	0.0136357	0	0.0110674	0.0366239	0.0416107	0	0.00846285	0.0123075	0.0572475	0.0518394	0.0499657	0.0306691	0.0173739	0	0.373196	0
ENSG00000260565	0.033	0.83	0.181562	0.454216	2.39151	0.799258	0.784185	0.716058	1.35024	1.67889	2.21657	0.138201	0.890978	0.301633	1.63598	1.56113	0.774553	0.644656	0.600585	12.3527	0.405563	0.544543	1.49805	1.51882	1.46847	1.14047	0.829843	0.436316	1.5886	1.00838	1.02971	1.2201	0.400786	0.673239	0.676291	0.471519	1.04995	1.10178	0.296497	0.5998	0.677491	0.281129	2.65924	5.00357	0.109904	0.906231	1.29232	9.1589	0.188493
ENSG00000267414	0.033	0.63	0.21096	0.479714	0.716115	0.215476	0.425605	0.559058	0.64122	1.57306	1.42975	0.0764776	0.400724	0.124073	0.518958	0.223152	0.0533813	0.0765691	0.172798	2.1131	0.766321	0.835026	0.0891008	0.135504	0.37893	0.177853	0.0866722	0.207204	0.942136	1.19997	0.600802	3.55367	0.203637	0.0942944	0.226748	0.162635	0.459041	0.719372	0.0804598	0.0877842	0.515975	0.313406	1.55343	0.164125	0.441843	0.172709	0.407609	0.938452	0.261893
ENSG00000269161	0.034	0.68	0	0	1.33182	0.407283	0.0658827	0.204872	0.897201	0.369238	1.14955	0.132045	0.48432	0.495092	0.218407	0.563489	0.0479271	0.305536	0.423115	2.62113	0.658745	0.0842369	0.285704	1.21659	0.961473	0.210106	0.277916	0.531523	0.339584	0.970597	0.420324	0.376628	0.249314	0.132281	0.10179	0.0429463	0.603996	0.376758	0.270896	0.72247	0.214913	0.296193	0.737585	1.78378	0	0.0674184	1.24583	2.63302	0.0734795
ENSG00000259972	0.035	0.85	0.257305	0.623171	3.57536	0.816852	0.73536	1.22196	2.3158	1.22351	3.70224	0.0368461	0.588847	0.630315	2.56983	3.03991	0.555007	2.77086	0.8855	7.24439	1.07227	0.235056	0.486311	3.71307	3.64256	0.469027	0.953867	1.32558	1.318	2.78285	1.31949	0.87454	0.892801	0.387576	0.383449	0.647126	0.748516	1.35919	0.270869	0.829306	0.83291	0.444245	2.86896	6.11364	0.0608824	0.249266	1.81423	5.05122	0.235794
ENSG00000272491	0.035	0.47	0.0410896	0.0438342	0.757182	0.0839383	0.0724159	0.344819	0.575266	0.380487	0.473828	0.0217709	0.228149	0.0170058	0.900242	0.154842	0	0.157422	0.232536	0.685965	0.0603391	0.0578688	0.0157017	0.250732	0.365821	0.531165	0.106916	0.0182572	0.212079	0.133356	0.231002	0.0887092	0.114182	0.0218098	0	0.0118013	0.15621	0.162689	0	0.027072	0.216539	0	0.442215	1.44919	0	0.037052	0.246058	0.542648	0
ENSG00000258515	0.036	0.82	0.191866	0.460534	1.72362	0.587919	0.126803	0.763984	1.29512	1.15483	2.12033	0.0254146	0.932163	0.59556	1.05091	1.44605	0.59959	2.83005	0.407182	14.534	0.774815	0.0405324	0.714857	1.02443	1.56584	0.444828	0.641882	1.6624	0.653593	1.40107	0.640452	0.647225	0.0799752	0.28006	1.07753	0.413291	0.820591	1.39849	0.260695	1.0429	0.528539	0.427559	0.924904	5.56031	0.0763519	0.259519	1.61104	6.96814	0
ENSG00000214106	0.038	0.83	1.8734	1.72713	2.29438	1.29142	2.37435	0.926884	3.95505	1.0994	2.74116	1.62575	1.42332	1.35926	2.7138	2.37261	1.28246	1.5359	1.48342	3.53295	1.52836	1.76546	1.38759	1.7563	2.60823	2.15786	1.2638	0.534382	2.24424	1.52378	2.1346	1.80173	0.976913	3.15091	1.2989	1.06947	2.53889	2.65566	1.31288	2.04193	0.838421	1.19115	1.49694	3.56875	0.533821	1.08971	1.18629	5.70163	1.06834
ENSG00000216863	0.038	0.01	0.0122763	0.0720295	0.0377037	0.0208984	0.0324534	0.00630741	0.0092074	0	0.157294	0.0151771	0.0056803	0	0.0478158	0.0359814	0.00393476	0.00313553	0.00578954	0.3689	0	0.0484103	0.00938238	0.029132	0.0910798	0.0068998	0.00912664	0	0.0684315	0.0438267	0.0143784	0.00220863	0.0409368	0.00868811	0.0626763	0	0.0116676	0.00441877	0	0.00808827	0.0235254	0.0121586	0.0513799	0.0127344	0.0227979	0	0.00958884	0.162126	0.0180977
ENSG00000245719	0.038	37.97	0	0	0.0106372	0.0117919	0	0	0	0	0.0221883	0.00611691	0	0	0	0.0145018	0	0.0265383	0.0163337	0.05782	0	0.0195111	0.05294	0	0	0	0	0.015389	0	0.0112406	0	0	0	0	0.0117884	0	0.024688	0	0.0627453	0	0.0110619	0.0343024	0.015531	0.0179635	0.0183767	0.00780778	0	0	0
ENSG00000264707	0.038	0.38	0.246779	0.682089	0.15503	0.412464	0.118615	0.144082	0.151436	0.0415483	0.0646762	0.08915	0.295845	0.0696374	1.17965	0.169083	0.0323578	0.128926	0.142832	1.60111	0.560055	0.142181	0.115735	0.148305	0.0998669	0.0756548	0.0875626	0	0.465486	0.0436864	0.0394139	0.108977	0.112216	0.214342	0.0343616	0.0483251	0.191899	0.327043	0.050804	0.0369525	0.789975	0.566593	0.0452707	0.078542	0.669573	0.136552	0.122663	1.36288	0.429948
ENSG00000279434	0.038	0.66	0.169837	0.126827	0.86588	0.208167	0.239455	0.767891	0.458569	0.492773	0.739874	0.0359946	0.45579	0.140582	0.628436	0.725347	0.15242	0.624652	0.272326	5.64229	0.282655	0.16265	0.467284	0.932722	1.29365	0.229094	0.340911	0.407501	0.252459	0.815781	0.381924	0.348331	0.811758	0.0721178	0.184981	0.195114	0.298621	1.84618	0.235891	0.305854	0.244098	0.134567	0.863137	1.7089	0	0.160805	0.53063	3.11022	0.10015
ENSG00000273759	0.039	0.87	0.33867	0.921295	2.02829	3.56298	0.537182	0.626418	0.660421	0.689935	2.6687	0.107665	2.53862	1.2615	0.989336	3.44586	0.553604	8.4598	0.622902	8.65045	0.646528	0.515126	1.63066	1.92882	1.50759	0.485386	0.830875	1.26404	0.839043	1.18708	0.761591	2.04726	1.69401	1.38417	0.864538	0.496071	0.772511	3.36451	0.276098	1.07104	0.989734	0.553448	2.61214	3.31988	0.188681	0.5268	4.07378	6.97731	0.299562
ENSG00000247982	0.04	0.86	0.0874875	0.609987	2.04402	1.32764	0.355181	0.658198	0.70304	0.567091	6.16132	0.413879	0.789379	0.085349	2.20887	4.46648	0.162239	1.19229	0.60121	5.16409	0.19271	0.279871	0.508644	0.959669	1.38162	0.13171	0.313593	0.483137	1.00633	5.81062	0.254707	0.300182	3.11535	0.112776	0.612571	0.533054	0.298449	1.0122	0.113212	0.473484	0.568831	0.965514	3.20578	2.31419	0.323283	0.401497	2.01589	3.26813	0.202674
ENSG00000236901	0.041	0.8	0.168588	0.0245249	3.27966	0.34048	0.719161	0.927214	1.45985	1.09278	4.25638	0.0669936	0.893531	0.547091	2.36729	2.19951	0.593162	3.74913	0.975767	2.84006	0.202555	0.161886	0.355793	0.845591	1.96146	0.310104	0.764827	0.715033	0.562432	1.62653	0.57352	0.368105	1.39267	0.0996531	0.340377	0.293821	0.576281	0.7406	0.680258	0.53013	0.721403	0.0455377	2.96727	2.55762	0.0152474	0.349823	1.59216	2.6009	0.124267
ENSG00000260331	0.041	0.46	0.0839853	0	0.464294	0.45751	0.518052	0.230137	0.146977	0.15554	0.376633	0.163162	0.0777209	0.243314	0.327121	0.457152	0.161513	0.815137	0.277255	2.10312	0.534432	0.0709688	0.0962811	0.398599	0.623101	0.0944068	0.187313	0.261219	0.242749	0.381602	0.216406	0.256867	0.373413	0.0297189	0.314443	0.217091	0.25942	0.24184	0.0507172	0.129113	0.3353	0.04159	0.326396	0.370259	0.0445619	0.0189331	0.634132	1.62675	0.165082
ENSG00000271870	0.041	0.93	0.464129	3.56494	4.87509	9.57611	0.797527	5.3416	3.37661	2.40677	6.42258	0.639378	3.35018	1.67119	3.9997	3.03164	0.937198	4.87219	1.24765	18.9447	4.29385	0.745172	0.691703	5.23948	6.95578	1.83907	2.12206	3.21711	2.32847	5.15163	3.03331	2.65535	4.56571	0.788332	1.75351	1.83956	3.10988	3.95933	0.798796	2.14055	2.22357	1.93065	5.3905	3.32201	0.70185	1.00445	3.95153	11.5235	0.752644
ENSG00000103472	0.042	0.65	0.528881	1.19111	0.44218	0.530199	0.258915	0.110706	0.763956	0.217663	2.29648	0.0259466	0.489433	0.291853	0.958464	0.529015	0.291944	0.525324	0.415705	5.02782	0.388325	0.289665	0.314384	0.95623	0.523182	0.330283	0.39319	0.117498	0.661208	0.791487	0.0963579	0.259023	0.718512	0.369099	0.160012	0.632913	0.418883	1.29027	0.0975889	0.161322	0.49268	0.50926	0.298651	0.365747	0.241645	0.185466	0.359552	4.52709	0.158824
ENSG00000224220	0.042	0.91	0.166145	19.2308	1.02055	2.77179	7.17389	1.6219	0.207685	0.102566	0.957957	0.733585	3.5363	0.206288	0.0808913	4.10443	0.692281	0.212178	0.940256	5.54737	2.27714	5.4754	0.317448	0.112648	0.821771	0.186761	0.617592	0	1.37206	0.862753	0.428108	0.478258	4.06289	0.205771	2.31855	0.620336	1.42117	1.19606	0.300995	0.145954	3.87373	23.2841	1.19206	0.775555	8.11027	0.149819	0.475837	2.63302	0.408219
ENSG00000265121	0.042	0.72	0.0768106	0	0.389245	1.1376	0.406111	1.44045	0.230437	0.142252	1.10719	0.0406974	0.0533111	0	0	0.192969	0.221573	1.35368	0.815046	0.865557	0.225589	0.0324531	0.176112	2.18729	3.13429	0.129513	1.37049	0.102387	0.118935	0.0373932	0.107956	0.0207285	0.0640337	0.0611552	0.313725	0.033091	0	0	0	0.556677	0.607179	0.0570557	0.0172219	1.64335	0	0	0	4.05759	0.0566173
ENSG00000231119	0.043	0.8	0.177441	0.263659	1.05101	4.69929	0.770634	0.42979	0.209132	0.399038	0.414109	0.503656	0.123155	0.220315	1.24033	0.0636828	0.597168	0.00971163	0.251047	5.99861	0.167509	0.139231	0.0581199	0.309361	0.394941	0.192336	0.169607	0.185842	0.816409	0.617019	1.051	1.69651	0.48604	0.0269096	0.207069	0.633393	0.605312	0.328469	0.0114808	0.626293	0.0485768	0.28244	0.397846	0.670519	0.110961	0.325725	0.633588	8.03443	0.056054
ENSG00000233360	0.043	0.12	0	0.11318	0.23895	0.024081	0.0155815	0.0242265	0.0353652	0.0109158	0.0906242	0.0249834	0.0490901	0.0439092	0.068872	0.11846	0.0566747	0.180651	0	0.177116	0.0346213	0.00996117	0.054056	0.083921	0.0349834	0.0099382	0.0657282	0.204274	0.167927	0.103298	0.0414201	0.0508995	0.0196546	0.018771	0.0240737	0.0304709	0.134445	0.0891047	0.021356	0.0699001	0.0621227	0.0175127	0.047575	0.0641976	0.00938206	0.0159447	0.0644531	0.529312	0.0173782
ENSG00000257550	0.045	0.31	0.0499085	0.0159727	0.248318	0.0509769	0.0395812	0.0358994	0.119783	0.055458	0.23021	0.0158661	0.0138558	0	0.306169	0.037615	0	0.0917807	0.0423668	0.549907	0.249184	0.134955	0.0686584	0.456819	0.636882	0.0757371	0.0445247	0	0.16074	0.0583119	0.126262	0.727303	0.0332853	0.031789	0	0.0602034	0.0426907	0.0862285	0.0361666	0.026306	0.00478207	0.014829	0.0626647	1.05613	0.00794432	0	0.0389829	0.63275	0.279587
ENSG00000260806	0.046	0.82	0.272952	0.922083	1.5369	2.32329	0.360786	1.55043	0.170599	0.463379	5.68312	0.610623	0.442038	0.433042	2.90149	0.342864	0.685307	1.30136	2.2527	0.417704	0.244948	0.243462	0.46937	0.447238	1.01254	0.127843	0.186013	0.747893	0.31933	1.19591	0.479536	0.507438	0.278115	0.193173	5.51228	0.365839	0.778259	0.622234	0.260982	0.34968	0.174356	1.10387	0.788792	0.88481	0.337928	0.666604	2.94926	0.200263	0.447097
ENSG00000272917	0.046	0.11	0	0.178972	0.0687004	0.0761587	0.0492781	0.0191547	0	0.0345223	0.143304	0.0197531	0.0517508	0	0	0.0936603	0	0	0.105492	0.746865	0	0.0315032	0.0427394	0.0379155	0	0	0	0	0.0692722	0.145195	0	0	0.372957	0.0395768	0.0380678	0	0.0531494	0.120773	0	0.0491258	0	0.276929	0.133743	0	0.0593434	0.0252134	0.0582399	0.0984707	0
ENSG00000236671	0.047	2.11	0.0399025	1.08548	0.0882369	0.00815134	0.0105486	0.0287021	0.0778115	0.0221697	0.061352	0.0380555	0.0110779	0.138722	0.0466258	0.0801965	0	0.00611498	0.0451637	0.979237	0.457048	0.0134873	0	0.0162325	0	0.0134562	0	0.0106379	0.0543713	0.00777018	0.319669	0.012922	0.013306	0.0254157	0	0.0412572	0.0284432	0	1.27229	0.00525799	0.0611732	0.260832	0.0143146	0.0186263	0.0381095	0.167314	0.0187004	0.569129	0.0117649
ENSG00000267040	0.047	0.78	1.63566	1.86737	1.65689	1.61206	1.23905	1.3171	1.3846	1.42604	1.23172	0.856505	1.18172	0.320663	1.80229	1.68213	0.469074	1.99357	0.622522	4.40735	1.23608	0.590045	0.646975	1.13818	1.63223	0.29031	0.778675	0.994527	0.568743	1.95577	0.934345	0.609196	1.32371	0.756492	2.88129	0.947794	0.777285	2.11742	1.7069	1.00204	1.36102	0.852622	1.22674	0.424177	0.928773	0.983291	0.941387	4.39606	0.282024
ENSG00000270012	0.047	0.79	0.219568	0.27027	2.0464	1.38011	0.714396	0.885138	0.557377	0.500477	1.52568	0.0492191	1.27776	0.335532	1.12247	1.97308	0.397892	2.34245	0.322596	1.96671	0.434041	0.0570887	0.309802	1.94102	2.08013	0.37734	0.602715	0.900554	0.727039	1.18402	0.646871	0.957177	0.253446	0.224123	0.517386	0.305607	0.860814	0.720409	0.328933	0.612037	1.14901	0.150551	1.37087	2.8317	0.0470485	0.439772	2.50657	4.30497	0.112046
ENSG00000225473	0.048	0.9	0.569911	0.526136	10.9666	0.0895556	0	0.0337863	0	0.791603	0.631922	0.0116139	0.0608542	0	5.92301	1.23903	0.0210769	0.251936	0.589233	35.02	4.37764	0.0555673	0	1.29297	7.93614	0.831587	0.562209	0.146093	13.6034	0	1.57119	0.0118307	0.402017	0.0698081	0	0.415504	0	0.591739	0.218409	0.0433256	0.0105014	0.0976928	0.058976	4.0928	0.0174456	0.0148243	0.0684847	25.5901	0.129256
ENSG00000269155	0.048	1.66	0.210813	0.283366	0.217547	0.499555	0.423549	0.134308	0.335199	0.312338	0.194481	0.0804219	0.17558	0.0523497	0.4434	0.254216	0.397307	0.587981	0.310191	0.0633489	0.247659	0.0712559	0.135339	0.0943356	0.0375373	0.149292	0.169264	0.0674422	0.386487	0.402303	0.183702	0.200256	0.239014	0.120848	0.258312	0.232501	0.198357	0.163902	0.129852	0.266678	0.307031	0.313187	0.185286	0.242735	0.181206	0.131167	0.177836	0.178182	0.236194
ENSG00000230587	0.049	0.28	0.048168	0.154156	0.244096	0.418193	0.127336	0.173237	0.180634	0.111508	0.324015	0	0.167157	0	0.316598	0.272274	0.0463161	0.110725	0.136298	0.723722	0.1061	0.203513	0.08283	0.220444	0.21442	0.142131	0.0268574	0.0642071	0.0596672	0.187594	0.0507744	0.0649944	0.0803112	0.127835	0.0245921	0.0207514	0.154507	0.338087	0	0.0158679	0.0692295	0.536695	0.097199	0.0562115	0.0958409	0.0977284	0.0564352	0.508903	0.142019
ENSG00000232160	0.049	0.61	0.453891	0.217894	0.448078	0.887477	0.95992	0.499723	0.797568	0.192137	0.984507	0.443189	0.297025	1.22373	0.492485	0.285073	0.386561	0.432253	0.513737	4.54646	0.323742	0.641067	0.126369	0.204429	0.644635	0.180397	0.940011	0.250655	0.261044	0.549255	0.496678	0.328972	0.594612	0.30287	0.403878	0.184368	0.730278	0.917236	0.35241	0.375946	0.584013	0.250458	0.735638	0.348079	0.258033	0.333279	0.49634	3.78497	0.143385
ENSG00000260306	0.049	0.5	0	0.352569	1.01503	0.267241	0.0728073	0.21933	0.154922	0.0382544	0.873381	0.0072962	0.0764606	0.0683911	1.00568	0.588119	0.0132411	0.0211031	0.0974139	1.00003	0.12133	0.0465453	0.0789331	0.742256	0.102166	0.116095	0.092138	0.0183559	0.298515	0.388822	0.0677399	0	0.298478	0.0657831	0.0562443	0.142381	0.157054	0.475837	0.0124737	0.0998007	0.0659725	0.18412	0.284053	1.07134	0.0438393	0.307331	0.656117	0.654697	0.0609019
ENSG00000261490	0.049	0.7	0.143708	0.439016	1.51669	0.633842	0.561223	0.771918	1.13662	0.314536	1.73251	0.0346102	0.598451	0.137878	1.01135	1.4031	0.0816536	0.375392	0.369673	2.60086	1.17027	0.0331188	0.104839	0.551396	1.27943	0.37448	0.203964	0.156731	0.493589	0.877685	0.720698	0.20096	0.457431	0.107483	0.12006	0.118194	0.535469	0.387952	0.11834	0.568096	0.920063	0.262017	1.83075	0.543772	0.0363922	0.247393	0.30103	2.48449	0.00962979
ENSG00000262198	0.05	1.17	0.62709	0	0.144447	1.0008	0	0.100685	0.470328	0.0362926	0.376633	0.249193	1.30571	0	0.171739	0	0.602981	0.0900941	0.609961	0.490729	1.09353	0.0331188	0	0	0.116312	0.0330424	0.0437065	1.25385	0.0485498	0	1.21187	0.0211537	0.0653472	0.0624096	2.04102	0.540316	0.055875	0.084644	1.98811	0.671386	0.826179	0.815165	0	0.0304919	0.343127	0.159038	0	0.414082	0.693345
ENSG00000268189	0.05	0.68	0.311945	0.019199	1.10546	0.269604	0.0951524	0.425343	0.332949	0.35552	1.24519	0.0699267	0.433017	0.193658	0.981363	1.11525	0.161513	0.946907	0.356471	3.57531	0.26428	0.0912456	0.330106	1.14699	0.587496	0.10115	0.267591	0.415817	0.535038	1.03967	0.210785	0.369111	0.500106	0.19105	0.159263	0.341144	0.307883	0.246159	0.0869438	0.56915	0.241416	0.0712972	0.624099	1.3908	0.0954898	0.0973704	0.946512	2.05985	0.141499
ENSG00000269186	0.05	0.37	0.0519909	0.0831955	0.622744	0.106208	0.137442	0.34726	0	0.14443	0	0.523391	0	0	0.227816	0.195922	0.049992	0.079675	0.220672	0	0.152695	0	0	0.423003	0.0771459	0.0876634	0.115956	0.0693029	0.0322014	0	0.146144	0.0280611	0.260055	0.165577	0	0.0895933	0	0.673697	0.0470945	0.239781	0	0.0772386	0.023314	0.121345	0.206895	0.0351615	0	0	0.229936
ENSG00000225826	0.052	1.4	0.168058	0.038418	0.0884833	0	0.126936	0	0.126047	0.0444632	0	0.0381618	0.0333264	0.149046	0	0	0	0	0.135869	0.360724	0	0.324599	0	0.0244168	0	0	0	0.0320027	0.01487	0.53764	0	0.012958	0.0800589	0.03823	0.196119	0.0413724	0.102681	0.36295	0	0.031636	0.11502	0.463674	0.0430638	0	0	0.0162369	0.0562579	0.190239	0.10618
ENSG00000228315	0.053	0.46	0.0280036	0.0784197	0.606347	0.0858093	0.101791	0.300349	0.23366	0.142622	0.403658	0.035239	0.218657	0.165157	0.403913	0.290204	0.0875127	0.936085	0.0940973	0.149017	0.179912	0.0354952	0.220711	0.402281	0.446692	0.0678756	0.101492	0.956538	0.218974	0.616885	0.233692	0.143587	0.291818	0.0557399	0.0857833	0.186997	0.174663	0.166316	0.076099	0.258304	0.236459	0.0884058	0.367308	0.585515	0.0167158	0.0568168	0.287087	0.369829	0.0464435
ENSG00000240731	0.053	0.97	2.07896	1.04555	12.314	2.36615	3.14052	5.09659	6.41522	5.88533	9.36118	0.692383	10.5539	4.7938	8.24211	7.5359	7.93902	19.1613	4.87423	13.2382	1.39562	1.55598	9.8738	16.5522	7.31547	4.15641	8.01493	7.20516	4.78265	7.80753	4.34117	6.89277	5.54605	2.93212	3.76043	5.93683	4.65746	2.43735	3.01307	5.67461	5.71987	1.32366	15.1825	45.1952	0.520024	2.49064	8.02647	14.1201	2.80212
ENSG00000267577	0.053	3.3	0	0.0446612	0.0128578	0	0.0184455	0.0286796	0.0418657	0	0.0268205	0.0073939	0.290567	0.242574	0.0203828	0.0525877	0.0134184	0	0.0394873	0	0	0	0.015998	0.0141924	0.0207068	0	0	0.0186017	0	0	0	0	0	0.133328	0	0.0240479	0.0298419	0	0.126407	0.00919428	0.00668559	0.310976	0.150186	0.0217137	0.35541	0	0	0.0737182	0
ENSG00000241769	0.054	0.82	0.101789	0.366485	2.81945	0.539334	0.269088	0.908679	0.772977	1.14875	2.89779	0.0707857	0.397392	0.236968	1.85844	1.23865	0.146813	1.29179	0.34203	2.99502	0.130791	0.198906	0.240676	0.951097	1.33102	0.230627	0.418571	0.279846	0.701372	0.898153	0.558838	1.04727	0.243964	0.260011	0.266337	0.306964	1.10196	0.508357	0.0806775	0.502981	0.365741	0.302439	1.63751	4.73661	0.0455696	0.124773	0.844753	3.79757	0.103165
ENSG00000227502	0.055	0.57	0.158124	0.506058	0.996842	0.272015	0.187006	0.183864	0.131079	0.19266	0.367883	0.171971	0.0808664	0.0826651	0.547007	0.439065	0.0400118	0.108407	0.105971	1.00034	0.42774	0.133617	0.114489	0.372412	0.160536	0.554284	0.13921	0.0554675	0.144328	0.32412	0.216392	0.0583935	0.166511	0.0441738	0.0339916	0.0788779	0.183901	0.422375	0.0527698	0.202878	0.207328	0.321458	1.59727	0.213665	0.211956	0.354589	0.70855	0.747377	0.0736128
ENSG00000242540	0.055	1.93	0.0191226	0	0	0	0	0	0	0.0531222	0	0	0	0	0.0279308	0	0.202261	0	0.135274	0.0957719	0	0.0807943	0	0.0194479	0	0	0	0	0	0.372373	0.497214	0.423163	0.988384	0	0.429572	0	0.0408927	0	0	0	0	0	0.0257252	0.0297544	0	0	0	0	0
ENSG00000258752	0.055	0.94	0.884762	0.0809023	3.91297	1.13608	0	2.8184	0.0568788	0.25749	79.2411	0.0535752	0.14036	0.0627735	7.23687	0.190522	0.0486141	0.116218	9.90689	12.6605	0	0.726276	0.231839	0.128545	6.86428	0.0639354	0.14095	0.0673926	0.140912	0.516867	0.19541	1.80098	0	0.12076	0	0.108905	3.22544	0.518643	0	0.0666205	0.0484429	0.0375548	0.0340071	0.826005	0.0201192	0.102577	0.296176	10.0821	0
ENSG00000259804	0.055	0.37	0.0255039	0.163245	0.305484	0	0.0337108	0.0917252	0.11477	0.0236164	0.14705	0	0.106207	0.126664	0.26076	0.416471	0.122617	0.273589	0.0721664	1.97984	0.0749037	0.172409	0	0.389067	0.264905	0.0645043	0	0.0339962	0.0789811	0.248317	0.0358452	0.3166	0.0425229	0.148908	0.234377	0.0878991	0.145437	0.165239	0.046204	0.0336067	0.048874	0.189445	0.754815	0.496045	0.0608947	0.120738	0.0398415	1.07781	0
ENSG00000236830	0.056	0.79	0.317127	0.316623	1.08636	1.16	0.755949	1.15866	0.282574	2.11835	0.812661	0.934917	0.511696	0.999519	0.455283	1.36529	0.239777	2.50472	0.640416	5.92547	0.481614	0.703152	0.357341	2.40927	1.11407	0.712956	0.456415	2.18227	1.01398	1.85525	0.659049	0.605653	0.573942	0.389885	1.24268	0.469419	0.635653	0.488787	0.0932983	0.416094	0.575257	0.382541	0.889709	3.71348	0.176894	0.496772	2.60195	4.32414	0.823137
ENSG00000261335	0.057	0.26	0.0667675	0.128209	0.123037	0.272787	0.105903	0.130357	0.0600921	0	0.359304	0.0283009	0.259507	0.13264	0.0780175	0.13419	0.115561	0.593456	0.226713	0.167196	0.196093	0.0451356	0.0459256	0.0950649	0.17833	0.0225158	0.11913	0.1958	0.0413535	0.0260032	0.103225	0.0648657	0.089058	0.0425272	0.190893	0.0575286	0.0761488	0.100937	0.0241918	0.0703841	0.198321	0.158706	0.131737	0.187	0.0318837	0.207713	0.0834421	0.141082	0.0590575
ENSG00000272100	0.058	0.83	0	0.0938343	0.810437	0.419262	0.310036	1.23526	0.483785	1.24889	0.788906	0.0932085	0.813983	0.582461	1.0278	0.957563	0.676618	3.54962	0.66371	1.46842	0.258332	0	1.00837	1.96802	1.04413	0.247184	0.392352	1.5633	0.254234	1.08479	0.247249	1.74072	0.29331	0.529125	0.359259	0.505251	0.835981	0.379924	0.318701	0.849965	0.898981	0.174231	1.60402	2.8285	0	0.158632	3.16037	3.09767	0.172893
ENSG00000280780	0.058	0.07	0.010887	0	0.0401242	0.0778402	0.0287807	0.00559361	0.00816541	0	1.31821	0.0115367	0.0151124	0	0.159017	0	0	0.00834205	0.292658	0.354415	0.0159873	0.0367986	0	0.0110722	0.193854	0	0.0242814	0	0.013486	0.0212001	0.00765072	0.0117521	0.018152	0	0	0	0.0620833	0	0	0	0.0156473	0	0.068348	0	0.00866482	0	0	0.373824	0
ENSG00000203446	0.06	0.63	0.375444	4.14333	1.72963	0.26447	0.0855619	0.11973	0.0485498	0.0599412	0	0.0891735	0.34145	0.353637	1.32368	0.390295	0.17428	0.0396801	0.238117	1.62098	0.190114	0.273496	0.192943	0.315999	0.115261	0.0109146	0.173246	0.0690289	0.424982	0.0882361	0.100077	0.279502	0.259027	0.577227	0.0396584	0.111549	0.249166	0.335517	0.0703626	0.127946	0.793905	0.538533	0.139331	0.28202	1.03038	0.34147	0.0808978	4.27439	0.438968
ENSG00000275678	0.06	0.6	0.126728	0.0155992	0.458076	0.159312	0	0.155265	0	0	4.42159	0.00516504	0.0135318	0.0121036	1.1818	0	0.0093735	0.0149391	2.23431	0.463814	0	0.189461	0.022351	0	0.361621	0.0246553	0	0.0259886	0.0181133	0.0854225	0.0205516	0.236765	0	0	0	0	0.298796	0.0736856	0	0	0	0.0144822	0	0.0379204	0.0465513	0	0	0.0257481	0.043113
ENSG00000249464	0.061	0.48	0.09137	0.292419	0.143932	0.183641	0.062334	0.112062	0.123794	0.046398	1.53515	0.213948	0.0981927	0.0841701	0.499386	0.0777493	0.028341	0.0383934	0.479556	2.08877	0.103877	1.56909	0.0236525	0.068944	0.0830962	0.131698	0.0262947	0.259304	0.15517	0.160706	0.186414	0.0668141	0.054057	0.0422402	0.367171	0.0634893	0.554656	0.442398	0.0186889	0.135934	0.158151	0.153256	0.43616	0.366891	0.246311	0.057807	0.0138132	0.76293	0.286777
ENSG00000225889	0.062	0.82	0.682325	1.07689	1.65352	1.25066	1.34666	0.403397	0.504744	0.328897	1.22156	0.138666	1.02499	0.290132	0.6007	1.4911	0.350515	1.05281	0.396724	6.29625	0.507852	0.339626	0.567913	0.541838	0.471555	0.307322	0.343968	0.361319	0.735223	1.17398	0.387539	0.131165	0.51428	0.114108	0.305411	0.378516	0.606299	0.383538	0.1524	1.02843	1.34786	0.888701	0.792173	0.901705	0.520737	0.195961	1.07321	6.27073	0.0964549
ENSG00000234394	0.063	0	0	0	0.00799901	0	0	0	0	0	0.0583988	0.00229992	0	0	0	0	0	0	0.0122828	0.01087	0	0	0.00497628	0	0.006441	0	0	0	0	0	0	0.00234285	0	0	0	0.0149605	0	0.00468731	0	0.00285994	0	0	0	0.00337709	0	0	0	0.0114653	0
ENSG00000226571	0.064	0.37	0.0250853	0.200707	0.0693393	0.0256223	0.13263	0.0128886	0	0	0.916034	0	0.0696427	0	0.0366401	0.535678	0	0.0384428	0.212946	1.4448	0.0368372	0.105987	0.0575158	0.0255121	0.260557	0	0	0	0.170907	0.293091	0.0176285	0.0541573	0.1673	0.013315	0.0256145	0	0.0178812	0.13544	0	0.0165276	0.0600898	0.298138	0.224978	0.117097	0.0998255	0	0.0587815	0.993865	0.0369809
ENSG00000259225	0.065	0.86	1.49856	3.68691	2.17467	0.640956	0.284738	0.356099	0.245863	0.251513	5.63426	0.947836	0.286024	1.2443	1.96994	0.235299	0.315207	0.531069	1.24561	0.422171	0.343844	1.74908	0.096635	2.067	1.33417	0.0473769	1.31601	0.0499388	2.10576	0.346529	0.368585	2.25458	0.0312321	1.0937	0.200836	0.258239	0.807825	0.414662	0.0509037	1.72783	1.92945	0.862687	0.0755992	0.30604	6.27651	0.994477	0.102419	0.717412	0.85606
ENSG00000217455	0.066	1.49	0	0	0	0	0.0175687	0.0136581	0	0	0.0255455	0.0774666	0.239854	0.0165031	0	0.0667839	0	0	0	0.199705	0	0	0	0	0	0.0224114	0.0148222	0	0.00823235	0	0	0	0	0	0.027144	0.0114524	0	0.37317	0.0240796	0	0.0445745	0.434417	0.667552	0	0	0.0539348	0	0	0
ENSG00000247416	0.066	2.06	0	0.0371536	0.0213928	0	0.0153448	0	0.00870701	0.01075	0	0.00615098	0.0322296	0	0.0169565	0	0	0	0	0.029071	0.0170477	0.0196197	0	0	0	0.00978724	0.012946	0	0.0215708	0.0113032	0.00815819	0.00626579	0.038712	0	0	0	0	0	0	0	0.0111235	0.0172467	0.0989105	0.00903178	0.00923955	0.0157025	0	0	0
ENSG00000250802	0.067	0.42	0.122372	0.361967	0.468086	0.0757522	0.0882272	0.120031	0.255873	0.120183	0.128285	0.0746613	0.401502	0.0966882	0.341227	0.237559	0.0784445	0.0653521	0.057711	1.13289	0.196036	0.300817	0.0510135	0.271535	0.154067	0.103167	0.0744346	0.103803	0.401931	0.223851	0.14072	0.294212	0.0741934	0.322798	0.55661	0.108633	0.20089	0.404431	0.181386	0.129489	0.117252	0.358086	0.189567	0.288497	0.141664	0.200631	0.509775	1.66507	0.169467
ENSG00000149656	0.07	0.01	0	0.0255141	0	0.0162857	0	0.00819203	0.0597926	0	0.061288	0	0.0221326	0	0	0.0600846	0.0306627	0.0488688	0	0.359344	0	0.0538928	0	0.0486468	0.0236588	0.0268843	0.0177805	0	0.00987539	0.0310483	0	0.025817	0	0.0253892	0.130246	0	0.0113654	0	0	0.010505	0.0458321	0	0.157297	0.0248091	0	0.0107832	0	0.0842274	0
ENSG00000204380	0.071	0.73	0.0234198	0.0187381	0.226575	0.0598028	0.247649	2.17193	0.0907536	0.122891	0.157539	0.0517032	0.671861	0.024232	0.148232	0.387341	0.0750646	0.131598	0.165673	1.10452	0.0171957	1.83718	0.0536971	0.0793941	0.237466	0.0427796	0.0435279	0.0260151	0.974281	0.0760086	0.0521171	0.0589884	0.0195241	0.035221	0.139498	0.100895	0.0890347	0.130662	0.0282856	0.0334322	1.64748	0.092781	0.0822659	0.318857	0.0403857	0.232303	0.189027	1.56708	0.0748054
ENSG00000205056	0.071	0.09	0.00647317	0.0690555	0.0596425	0.0969722	0.0114083	0.00332585	0.0226566	0.00199804	0.178321	0.0022865	0.0329469	0.00267907	0.0787903	0.154492	0	0.01488	0.0335806	2.23155	0.00316857	0.0309962	0	0.0285276	0.0800427	0.0018191	0.0096248	0	0.0467747	0.176472	0.0075816	0.0151397	0.241039	0.00229058	0.0132195	0.00929574	0.0107664	0.0722294	0.00390903	0.0284325	0.0175734	0.0929611	0.150942	0.0570755	0.0274769	0.0116742	0.0404489	0.222268	0.0127237
ENSG00000238018	0.071	0.88	0.352453	0.0593677	5.3839	0.322103	0.858181	0.857777	1.96172	0.996285	1.81826	0.127772	0.540745	0.253354	3.82035	1.6544	0.695641	1.97573	0.31494	12.0776	0.326886	0.188102	0.148862	0.962153	0.522982	1.76721	0.496472	1.23635	0.585955	0.650206	0.756084	0.270326	0.309289	0.275693	0.227298	0.719247	0.330571	1.78276	0.168031	1.23441	0.808724	0.110234	0.790244	3.99762	0.103347	0.288547	0.941804	12.1511	0.191427
ENSG00000253490	0.071	0.04	0.0289651	0.033107	0.0190628	0.0972085	0.0164082	0.0680319	0.0124139	0.0076633	0.0636218	0.0197317	0.0516947	0.030826	0.302193	0.036384	0.0159152	0.0475591	0.0526889	0.269409	0.0182291	0.0314691	0.0474368	0.113623	0.0368396	0	0.0184575	0	0.0256286	0.0483459	0.00872356	0.0804002	0.0551931	0.039534	0.0338014	0.0320877	0.0442432	0.111705	0.0112446	0.0436201	0.081278	0.0553258	0.122465	0.0354116	0.0263463	0.0195892	0.0290884	0.295092	0.0244003
ENSG00000260032	0.072	0.99	51.2841	27.1029	56.3489	70.1204	85.9797	71.5259	82.8929	49.8748	68.6701	41.0112	79.4804	89.1571	51.6605	65.547	94.7474	56.9861	66.4756	227.854	21.1765	49.1856	73.4436	44.3126	50.4808	93.557	94.6539	45.8639	48.2279	49.5688	77.6589	88.4672	66.5394	39.7874	170.617	44.6058	83.1284	104.881	19.8895	46.8832	52.1035	34.7576	52.7073	63.3894	19.7486	53.2481	35.1131	112.861	48.3426
ENSG00000261218	0.072	0.51	0.0355656	0.872649	0.393234	0.314834	0.517114	0.0730929	0.142266	0.0658672	0.729118	0.00628137	0.773452	0.103037	0.277055	0.863719	0.148192	0.0545037	0.352231	0.890619	0.208909	0.190339	0.217454	0.204967	0.0879559	0.0599683	0.0661021	0.0158028	0.308394	0.611767	0.233272	0.0575876	0.731355	0.031463	0.0847373	0.173651	0.152111	0.192025	0.0429549	0.0312434	0.386215	0.52837	0.388081	0.470386	0.292498	0.0881948	0.231499	0.501009	0.0873851
ENSG00000260244	0.073	0.96	4.68204	2.74994	8.29666	3.23296	7.16219	1.37397	6.21436	4.83081	10.768	6.81506	3.18876	1.64384	5.86538	3.27104	0.7672	5.11934	11.0652	38.2915	8.66515	9.89839	4.03066	4.61903	11.566	2.52803	4.41945	3.20235	3.51898	7.27336	5.13256	2.24784	6.05218	2.0477	3.06187	3.45246	7.23111	5.98367	0.611545	7.9257	3.78469	2.95684	2.91735	7.75585	2.17023	3.19019	3.47218	18.6194	10.3922
ENSG00000260495	0.075	0.46	0.00851392	0.0817435	0.266715	0.191316	0.0787754	0.104985	0.236266	0.0551869	0.212721	0.00902204	0.0827282	0.010571	0.161662	0.25667	0.0654927	0.215282	0.10841	2.5371	0.0875174	0.00719438	0	0.458915	0.240032	0.0789557	0.0379774	0.10214	0.126557	0.198949	0.107695	0.128666	0.0709768	0.0723052	0.0434677	0.0513506	0.0667574	0.110323	0.0385605	0.106579	0.0938142	0.0505937	0.5345	1.09292	0	0.0921277	0.226104	1.48419	0.0125513
ENSG00000260774	0.075	0.56	0.04775	0.241963	0.161318	0.455207	0.0631157	0.106312	0.226818	0.154757	0.260022	0.00843331	0.110471	0.118575	0.185985	0.259915	0.306095	1.18911	0.0900766	2.61069	0.128553	0.0268997	1.3594	0.1295	0.10628	0.127479	0.22187	0.201558	0.11337	0.0929833	0.151001	0.193291	0.0530762	0.261899	0.276292	0.219427	0.175858	0.283591	0.0288354	0.178275	0.316455	0.248284	0.171299	0.786323	0.0633395	0.102263	0.341889	3.23713	0.328502
ENSG00000233250	0.076	0.79	0.105174	0	1.7443	0.107426	0.139019	0.594411	0.631059	1.0713	2.82993	0.0557256	0.291988	0.391758	1.99705	1.18901	0	2.41766	0.892811	0	0.926676	0.0888737	0.482289	1.60445	0.312122	0.266006	1.87657	0.700976	0.455989	0.81922	0.221731	0.340594	1.05215	0.390776	0.536965	0.362483	0.449819	0.340712	0.381077	0.762239	0.403098	0.312498	1.50921	2.53656	0.167414	0.213389	1.06795	0.555592	0.155048
ENSG00000246084	0.076	0.11	0.0341529	0.182171	0.0104893	0.151164	0.0300954	0.0233965	0.0683073	0.0210836	0.0437597	0.0844461	0.0316055	0.0565398	0.0166281	0.100101	0	0.0261693	0.04832	0.712702	0.0835879	0.0577194	0.039153	0.0810459	0.0506773	0.0191954	0.0634764	0.0151751	0.0211531	0.110843	0.00800021	0.0122889	0.0569436	0.187322	0.023249	0.058854	0.0243447	0.110638	0.0309365	0.0150012	0.0709024	0.135302	0.0357351	0.0708551	0.0815456	0.0153985	0	0.751732	0.0671312
ENSG00000260686	0.076	0.78	0.536881	0.606433	1.14453	1.086	0.570499	3.4832	1.76069	0.370425	1.11278	0.396015	0.321482	0.0914942	0.876434	0.409925	0.030367	1.17768	0.595754	3.79605	1.20578	0.934031	0.313775	0.481778	2.40555	0.763252	0.493052	0.308713	1.54527	0.840471	0.932123	0.744314	0.386143	0.178804	0.365472	0.308393	0.517767	1.80743	0.28607	0.395341	0.433728	0.422259	0.31156	0.245699	0.268108	0.14239	0.172674	3.8093	0.294863
ENSG00000224397	0.077	0.96	7.95136	12.2896	23.5215	1.93962	3.75889	2.6867	8.50346	2.16556	1.31245	2.14613	4.47989	5.02919	24.2116	5.31124	1.52014	0.688112	4.35429	0.53878	3.10455	4.54522	4.56846	4.92809	1.61015	0.44953	4.7256	1.59609	11.4893	1.5939	2.62953	5.72549	2.88544	9.1212	1.08892	4.03811	2.18046	4.64661	1.22019	3.37748	13.9288	5.43384	1.38429	2.90382	13.0514	5.8014	1.38097	1.95194	10.7566
ENSG00000267745	0.077	0.84	1.15397	0.575161	1.39442	2.74379	2.0004	1.72037	2.12826	0.595594	1.52704	1.01235	0.709011	1.15093	1.38156	0.522782	1.61892	0.550823	0.588823	4.31088	0.527818	1.00709	0.498803	1.69306	0.814042	1.46728	1.30795	0.0252166	1.68722	0.736757	0.71788	0.204207	1.98711	0.552263	0.753347	1.89077	1.56422	1.79764	0.137087	2.66727	0.879116	0.449666	0.466569	1.69253	0.31618	1.16425	1.43329	3.39773	1.00398
ENSG00000272752	0.077	0.77	0.12611	0.317115	1.09555	0.380295	0.254006	0.672622	0.486434	0.800757	1.15417	0.07	0.691885	1.05878	1.24553	1.67463	0.629404	1.20558	0.161429	1.00755	0.335105	0.0710431	0.660905	1.14819	1.44355	0.298705	0.542439	1.92917	0.479807	1.07	0.658339	0.687136	0.69087	0.733125	0.374047	0.739919	0.646375	0.466894	0.261105	0.953534	0.47183	0.196273	0.934436	2.82657	0.0334564	0.158393	2.05449	0.888248	0.0885295
ENSG00000274769	0.077	0.3	0.0165784	0.0265287	0.305501	0.0846666	0.0438265	0.0255535	0.0994728	0.0460546	0.637253	0.00878393	0.460256	0.0205841	0.242148	0.187422	0.0478232	0.406498	0.0469108	0.58121	0.121725	0	0.0570168	0.0168605	0.122998	0.12579	0.221851	0.0441975	0.112949	0.193698	0.128154	0.0536873	0.0552829	0.0175992	0.169282	0.0285688	0.0354521	0.0895097	0.0300343	0.0546139	0.135022	0.0738877	0.193289	0.167672	0	0.011212	0.194238	0.262731	0
ENSG00000279884	0.077	0.31	0	0.154318	0.111069	0.123127	0.0318675	0	0.0361648	0	0.231683	0.0127741	1.2048	0.0898037	0.140858	0.302845	0.0463648	0.0184736	0.0682204	1.08672	0.106212	0	0.027639	0.0735585	0	0	0	0	0.029865	0.187792	0	0.1041	0.0401978	0.0255938	0	0	0	0.182238	0.0218388	0	0.0462016	0	0.389205	0.0750274	0.057565	0.0489156	0.0188315	0.382079	0
ENSG00000260911	0.079	0.79	0	0.490279	1.78789	0.782365	0.134993	1.12817	0.651087	0.330998	1.27585	0.0541121	0.637952	0.0634026	1.5663	1.34702	0	4.57794	0.0722468	0.895115	1.04982	0	0.643947	0.882866	0.681942	0.387457	0.911119	0.748749	0.632552	0.84522	0.358851	0.661466	0.595984	0.271044	0.104284	0.175994	1.12839	0.441129	0.0925109	0.201865	0.807318	0.30345	1.6258	2.26448	0.162567	0.13814	0.119658	1.48364	0.150559
ENSG00000279031	0.08	0.71	0.393051	0.419305	0.804777	0.490679	0.461806	0.426329	0.13102	0.444844	0.335741	0.161976	0.181867	0.271122	0.510309	0.438866	0.671893	0.936979	0.185365	2.95278	0.256527	0.553556	0.600794	0.5774	0.324013	0.294549	0.438314	0.349286	0.838524	1.27564	0.398974	0.824996	0.946601	0.625879	0.535124	0.263404	0.280173	1.41476	0.0791188	0.402832	0.523068	0.129761	0.528762	1.15521	0.20855	0.177214	1.22803	1.96097	0.257528
ENSG00000279386	0.08	1.3	0.345431	0.207284	0.238705	0	0.513662	0.0221848	2.72033	0	0.746882	0.0228779	0.359624	0.107223	0.315339	0.488145	0.0415188	0.529366	0.18327	1.73003	0.0634072	0.0364868	0.148501	0.395221	0.0640703	0.364026	0.337058	0.575566	0.133718	0.252246	1.09237	0.18644	0	0.252107	0.0881796	0	0.400122	0.466259	0.195562	0.284486	0.186177	0.192442	0.174263	0.268742	0.171828	0.14601	0.067453	1.02643	0.127309
ENSG00000230314	0.081	36.29	0	0.0231186	0.0133115	0	0	0.0296916	0.0108358	0	0.0277669	0.0076548	0	0	0	0	0.0138919	0	0.0408807	0	0	0	0	0	0	0	0.0161111	0	0	0	0.0101528	0	0.0240883	0	0	0	0	0	0	0	0.027686	0.0429266	0.0971785	0	0.0114985	0	0	0	0
ENSG00000272732	0.082	0.85	0.290929	0.243856	1.55728	0.792418	0.531042	2.03572	0.311716	1.28285	2.02358	1.26253	0.519227	0.0860054	0.728462	0.574271	0.159854	4.23551	1.03883	2.01214	1.17995	0.889704	0.524106	0.464952	0.534474	1.22636	0.401677	1.01567	0.926699	0.553035	0.866468	0.486025	0.716056	0.0294136	0.311213	0.644584	0.474009	0.688148	0.0752943	0.620677	0.969018	1.09081	0.242283	5.15194	0.452068	0.318557	1.21195	5.85469	1.1437
ENSG00000232021	0.083	0.09	0.014333	0.183484	0.0220102	0.0634391	0.0757809	0.0368206	0.0573331	0.0442409	0.0367294	0.0430338	0.0530556	0.0296601	0.020935	0.0900205	0.0137819	0.0366084	0.067595	0.095712	0.0771747	0.137264	0.0492941	0.082602	0.00708926	0.0241673	0.00532784	0.0445797	0.0798962	0.18607	0.00671491	0.121196	0.0398293	0.0152155	0.160989	0.0288158	0.0715174	0.0412725	0.0173108	0.02833	0.089267	0.184542	0.102836	0.0334528	0.087457	0.0420048	0.0298542	0.265003	0.225384
ENSG00000250658	0.085	0.14	0	0	0.0499654	0	0.329725	0.267477	0.00813451	0	0.0833795	0	0	0	0	0.0544949	0	0	0	0	0	0	0	0	0	0.0640059	0.0725685	0	0	0	0.0228653	0.0058538	0	0.0172704	0.0885968	0	0.0154621	0	0	0	0.358527	0	0.00972705	0.0506275	0.0517922	0	0.0084715	0.372409	0.0159889
ENSG00000228723	0.086	0.96	0.78073	0.0254963	3.14165	2.13194	0.189544	1.72732	0	0.0737706	76.9854	0.194168	0	0.0791321	24.5524	0.0400286	0	0.134296	14.54	4.26924	0.0935906	1.40024	0.785437	0	9.78793	0.0940296	0	0.148671	0.217107	1.19453	0.246333	4.11924	0	0.0422859	0.0813471	0.0960995	5.6106	0.498953	0	0	0	0	0.0357244	0.210731	0.0253622	0.0215514	0	2.23047	0
ENSG00000226337	0.088	0.01	0	0	0.012148	0.0538673	0	0	0	0	0.101359	0	0	0	0.173319	0	0	0	0.0186537	0.165081	0	0.0111412	0.0151149	0.0268178	0.0195637	0	0	0	0.00816607	0	0.00926533	0.00711612	0	0	0	0	0.0281945	0.0284743	0	0	0	0	0.0236492	0.020515	0	0	0.0102983	0	0
ENSG00000279048	0.088	0.66	0.0378975	0.166769	0.384098	1.72254	0.100185	0.243391	0.298449	0.0350929	1.14717	0.0351393	0.473455	0.117635	0.567376	0.404636	0.109321	0.943754	0.469156	1.5896	0.278258	0.00800598	0.0977531	0.337245	0.477986	0.0479251	0.274701	0.366246	0.152571	0.147595	0.239689	0.403975	0.0947805	0.0955486	0.212834	0.0571435	0.256632	0.153461	0.0944031	0.212236	0.381277	0.0844518	0.531069	1.11302	0.0301622	0.41649	0.680829	2.40236	0.125705
ENSG00000237181	0.089	0.89	1.22324	10.54	4.71059	2.56293	1.16083	0.72518	1.34089	0.784189	2.6524	1.64524	1.74154	3.15443	2.06157	3.07311	0.482549	0.600833	1.46441	0.785434	1.93448	2.17333	0.719144	1.85013	1.07044	0.237986	1.39909	0.167237	2.97226	1.58801	0.771456	2.06531	2.82397	2.13098	0.512431	1.081	1.3191	2.3031	0.909163	1.15725	3.35092	6.47695	1.33617	1.46411	7.26429	1.86669	0.661473	1.82258	1.06349
ENSG00000278338	0.089	0.24	0.0319925	0.0511942	0.0589546	0.0871397	0.0140958	0.0547914	0.0639864	0	2.31603	0.00565031	0.0148031	0.0264817	0.514017	0	0.0205083	0.0735419	0.256493	0.293752	0.0313202	0.0540683	0.0244509	0.0216912	0.506364	0.0269718	0.0237845	0	0.01321	0	0.0449649	0.080581	0.195586	0	0.0108892	0.00918852	0.212845	0.023031	0.0193197	0	0.112399	0.0158429	0.0573851	0.0580765	0.0509249	0.0504854	0.0416483	0.225338	0.0157212
ENSG00000279821	0.089	2.12	0.0606159	0.0727479	0.132645	0.19348	0.170259	0.10511	0.085243	0.259601	0.145625	0.0040146	0.157766	0.0940773	0.154939	0.095177	0.116571	0.0348348	0.1072	0.303584	0.0445066	0.019208	0.0521178	0.107883	0.067458	0.0766548	0.0506972	0.0303	0.0844727	0.634449	0.0585712	0.139044	0.126332	0.100544	0.0618948	0.0391712	0.221441	0.0818188	0.102951	0.0948505	0.170611	0.0562826	0.122318	0.100212	0.0241217	0.030746	0.165712	0.26017	0.0223401
ENSG00000236318	0.094	0.96	2.49277	0.0876684	0.630985	4.33681	0	0.168891	0.575266	0.405853	4.15916	0.304793	2.16741	0	1.24033	0.206456	0	1.11245	6.12346	3.36123	0.764295	1.04164	28.797	0.139295	0.812935	0.300224	0.305475	1.46058	6.07394	0.560094	0.596756	0.0295697	0.365382	0.639754	0	4.24846	10.1536	0.147899	0.248132	1.10093	1.79793	0.895304	0.0245675	0.660658	0.61045	0.333468	0	43.2671	0.242298
ENSG00000184385	0.099	0.69	0.10709	0.119955	0.414417	0.0656295	0.0707754	0.891351	0.0963831	0	4.46629	0.0226963	0.0148654	0.651528	2.31498	0.121067	0.0102973	0.114879	0.863621	0.134085	0.0314519	0.425315	0.0613842	0.054456	0.492602	0.117369	0.0238844	0	0.0198984	0.0417071	0.0451539	0.358359	0	0.0795788	0.918534	0	0.511448	0	0.0194009	0	0.0256525	0.445466	0.0144066	1.74962	0.102278	0.0724252	0.200752	0.0565712	0.0315745
ENSG00000241490	0.101	0.03	0.00739374	0.0354942	0.061312	0.022656	0.039092	0	0.0110908	0.0205397	0.227364	0.0039175	0.0102634	0.00918019	0.0215988	0.120738	0	0.0113308	0.041843	1.7219	0.0217151	0.0187434	0	0.0375976	0.0109711	0	0.00824518	0	0.0183177	0.06479	0.0103918	0.0159625	0.0246554	0.031396	0	0.00637063	0.0368926	0.023952	0	0.00487139	0.0106267	0.0549214	0.0397865	0.0345136	0.00588459	0	0.0173255	0.331993	0
ENSG00000258551	0.103	0.1	0.00878803	0	0.0161942	0.0897616	0	0.0135456	0	0.00813767	1.33431	0.0512188	0.0121988	0	0.12836	0	0	0.0134675	0.0994674	0.0440132	0.193575	0.133668	0.0100746	0.0178751	0.0912799	0	0.00980003	0	0.0489871	0	0.00617571	0.0237159	0.0293048	0	0.00897344	0.015144	0.050114	0.0664272	0	0.0231601	0.0042102	0.0652783	0.00788156	0.0478591	0	0.291225	0.00686422	0.116059	0.0388661
ENSG00000244063	0.104	0.55	0.165346	0	0.304693	0.844428	0.072851	0.113271	0.124012	0	0.423712	0.087607	0.306026	0.0684322	0.563517	0.276928	0.0529963	0.422316	0.0779779	1.51819	0.404678	0	0	0.168159	0.245346	0	0.184387	0.367339	0.204819	0	0.116195	0.0892423	0.183789	0.175527	0.0562781	0.0474887	0	0.0595153	0.0998495	0.0726259	0.211239	0.0818804	0.0741454	0.214396	0.263194	0.149098	0.258299	1.74691	0
ENSG00000181123	0.107	0.77	0.170398	0.0151483	0.750117	0.299745	0.0250256	0.379377	0.0213002	0.0438299	8.13275	0.0451419	0.302236	0	4.92241	0.0594561	0	0.195849	1.98222	0.16594	0.0556056	0.247981	0.26046	0.048138	1.62943	0.0558664	0.0211134	0.0378562	0.0879488	0.0460853	0.113093	0.556923	0.0157837	0.0200989	0.0289988	0.0407831	0.506093	0.0920005	0.01715	0.0311854	0.0181411	0.0140637	0.182537	0.213582	0	0.0128045	0.0221826	0	0.0279113
ENSG00000260070	0.111	0.21	0.032522	0.0520414	0.0299651	0	0	0	0.097568	0.0301152	0	0	0.0451443	0.121139	0	0.0408518	0.0938148	0.224277	0	1.79168	0	0	0.0745666	0.0661505	0.0482572	0.0822544	0	0	0.060429	0.0316649	0.045709	0.0175531	0	0.0172622	0.0996242	0.0840652	0.0927287	0.0351183	0	0.0214272	0.0311615	0.0483152	0.16042	0.202414	0	0.0219947	0.330232	0.0859	0
ENSG00000180712	0.117	0.46	0.00974415	0.405406	0.395035	0.258771	0.141677	0.0750965	0.0876992	0.0992533	0.824014	0.160048	0.108208	0.120985	0.782786	0.208079	0.0562171	0.0522645	0.220578	0.439216	0.0572362	0.395229	0.0335122	0.0594596	0.245798	0.353243	0.0217325	0.0779326	0.0784575	0.18026	0.116409	0.141999	0.113726	0.0155162	0.0994972	0.0503748	0.13197	0.189397	0.0617853	0.0449398	0.088697	0.159237	0.266541	0.591307	0.093063	0.0856698	0.0532772	0.617691	0.100554
ENSG00000275734	0.121	0.74	0.138329	0.110676	1.3064	0.105967	0	0.142144	0.207497	0.0320229	3.1903	0.018323	0.192016	0.171751	1.36381	0.521277	0.0332526	0.476969	0.880692	1.29899	0.152349	0.0876673	0.0792903	0.351705	0.821028	0.262395	0.42421	0.138292	0.128514	0.336708	0.121511	0.466626	0.172978	0.110135	0.0353118	0.0595937	0.197206	0.224058	0.0313253	0.136708	0.182245	0	0.914944	2.55594	0	0.11694	0.216094	0.639391	0
ENSG00000244055	0.131	0.88	0.0981226	0.837414	2.77252	0.801785	0.648489	0.571362	2.23234	0.696601	1.82299	0.138638	0.862636	0.934036	1.9587	1.72557	0.566101	1.85458	0.27765	3.93143	1.34485	0.414575	0.337464	1.43035	3.00902	0.827238	0.656532	0.30519	0.425416	1.08275	1.42506	0.65317	0.927073	0.503461	0.333976	0.591814	0.909264	0.953603	0.177763	1.14212	0.799152	0.5345	1.9067	3.48613	0.182221	0.265442	1.73723	7.25677	0.0964353
ENSG00000226806	0.139	0.11	0.0615681	0.137929	0.0340366	0.0628861	0.0976564	0	0.00923542	0.0114024	0.0709979	0.0456698	0.0854638	0.0764441	0.0179855	0.0154675	0.0473608	0.0094352	0.0174215	0.154176	0.0361646	0.166483	0.0423492	0	0	0.0103812	0.0411949	0.0164138	0.0686398	0.0479565	0	0	0.0821227	0.0653592	0.0251468	0.0212195	0.0789962	0.03989	0.0223079	0.11358	0.023597	0.182934	0.0331305	0.0287397	0.0588016	0.0416387	0.0384721	0.162619	0.0363056
ENSG00000232591	0.144	0.34	0	0.461085	0.227563	0.0420445	0.544094	0.0422985	0	0	0.158226	0.08724	0.285698	0	0.0601239	0.258533	0	0.063082	0.116477	0.103079	0.0604474	0.139134	0.0943796	0.0837273	0	0	0.0459036	0.05487	0.0509903	0.0801571	0	0	0.137264	0	0.0840635	0.0354674	0.0293419	0.0444495	0.0372867	0.0271206	0.29581	0.550377	0.0922934	0.128099	0.131046	0.0835166	0.0321522	0.434898	0
ENSG00000281468	0.153	0.9	0.794355	1.8489	1.59688	18.44	1.19315	0.686402	1.08323	1.27053	2.01246	0.306096	1.10266	2.7347	1.31846	1.54208	0.381907	0.691667	0.817356	10.2172	1.11347	0.457665	0.538113	2.24	1.50015	0.700134	2.13405	0.72195	1.02872	0.70311	0.964208	2.24113	1.20404	1.30323	3.68688	0.622215	1.7759	0.623833	0.654132	0.927782	2.49096	2.68207	1.34388	1.26409	0.689692	0.561643	3.27152	4.86383	0.372605
ENSG00000279148	0.165	1.66	0.248253	0.283753	0.179721	0.108672	0.281262	0.0546642	0.385688	0.0985206	0.136322	0.450976	0.443063	0.440337	0.103601	0.467758	0.0852532	0.14946	0.175616	0.710475	0	0.419556	0.142299	0.126239	0.13156	0.134546	0.217518	0.141822	0.219657	0.362567	0.361377	0.315834	0.354785	0.687085	0.488875	0.366688	0.290718	0.114888	0.562184	0.280393	0.331317	0.131718	0.349873	0.193139	0.127017	0.143909	0.26316	0.889892	0.209129
ENSG00000248663	0.172	1.17	0.0801677	1.9884	0.166196	1.16685	0.0264913	0.123568	0.0450953	0	0.385193	1.46543	0.389488	0	0.351283	1.15806	0.462513	2.51854	0.283556	0.853199	1.64814	0.0338715	0	0.8357	0.0892168	0.0168967	0.134099	0.0534311	0.0248266	1.28791	2.2394	0.0649035	1.10273	0.117018	3.00832	0.0863432	1.37148	0	0	0.422551	0.777743	0.655043	0.161772	0.0623698	0.0638046	0.786156	0	0.0529366	0.0295459
ENSG00000251442	0.175	0.93	2.79704	9.61056	1.98297	1.5475	1.48911	0.447095	2.84372	0.50362	0.447977	1.42024	2.63156	1.78466	1.80439	1.53226	0.470663	0.226227	1.33009	1.67323	3.21746	1.62165	2.013	1.18526	0.403506	0.203058	1.62022	0.165707	2.67077	0.499277	0.458639	0.956111	0.829075	2.15684	0.317339	0.923834	2.07685	1.35076	0.337817	2.57486	5.6318	7.12179	0.334471	0.574242	11.4584	1.39246	0.254886	3.26295	1.38593
ENSG00000258473	0.187	0.3	0	0	0.13513	0	0	0.150705	0	0	0.75166	0.0259023	0	0	0	0.245634	0	0	0.207498	0.856944	0	0	0	0	0.14508	0	0	0	0	0.0475986	0.0343548	0	0	0	0	0	0.0696948	0	0	0	0.0702628	0	0	0.0760672	0.0389085	0	0.038185	1.033	0
ENSG00000259175	0.221	0.02	0.0090984	0	0.00838309	0.0185863	0	0	0.0272958	0	0	0	0	0	0.0132893	0	0	0	0	0.0911353	0.0267216	0.00768829	0.0104304	0.0647724	0.0675027	0.00767055	0.0202923	0	0.0112705	0.0177173	0.070332	0.00982138	0.0151699	0	0.0185807	0	0	0.00982475	0	0.0179836	0	0	0.0122399	0	0.00724131	0	0	0.288379	0
ENSG00000273888	0.229	1.48	0.185152	0.0658398	0.11373	0.126077	0.0951737	0.0634193	0.300878	0	0.197694	0.185302	0.328405	0.255431	0.0751211	0.0904459	0.257159	0.0394086	0.160084	0.798507	0.181261	0.112996	0.0825451	0.303375	0.595259	0.0520317	0.0229415	0.0137113	0.0318547	0.160242	0.484312	0.0999322	0.102902	0.376726	0.409626	0.0354514	0.329948	0.144396	0.0652224	0.887802	0.182334	0.076407	0.226017	0.344111	0.155547	0.0834791	0.0482066	0.869405	0.090984
ENSG00000280265	0.241	0.79	0.0365095	0	0.336392	0.186455	0	0.365785	0.0547655	0.118327	0.31576	0	0.0253397	0	0.213306	0.252234	0.0526588	0.0139875	0.103308	5.39411	0.0268067	0.0308511	0.062782	0.0185653	0.108348	0.1539	0.0407138	0.0243333	0.158289	0.266605	0.0256567	0.00985265	0.0913092	0.0581363	0.0745595	0.0786438	0.0780737	0.611074	0	0.0120272	0.07871	0	0.253763	2.04509	0.0290575	0	0.128327	2.36259	0
ENSG00000261502	0.245	1.46	0	0	0.00552298	0.0428579	0	0.0708348	0.0449578	0	0.0115205	0.01588	0	0	0.0350212	0	0.0230551	0.0137791	0.00848074	0.0450316	0.0616169	0.0658479	0	0.0670585	0.00889447	0.333534	0	0	0.0259884	0	0.286443	0.216764	0	0	0	0	0.0128184	0	0.0108594	0.114531	0	0	0.292989	0	0	0.539171	0	0.0158325	0.0972042
ENSG00000229236	0.297	0.21	0.0398516	0.0637704	0.0979161	0.122114	0.0351171	0	0	0	0	0	0	0	0	0	0	0.0101786	0	0	0	0	0	0	0.0394222	0.0447967	0	0	0	0.10347	0.634788	0.0286789	0	0	0.0135641	0	0.151503	0.0573774	0.0240657	0	0.0636409	0.0197348	0.0297842	0	0.0105725	0	0.0207517	0.771905	0
ENSG00000246792	0.424	3.11	0.024084	0.0289043	0.0665716	0.0184497	0.00795852	0	0.0632219	0.0167262	0.0231439	0.00319017	0.158799	0.00747578	0.0263831	0.0680685	0.00578952	0.0138406	0	0.271396	0.00884171	0.0101757	0	0.0796047	0.00893418	0.0152283	0.0201431	0.0321035	0.0111876	0.00586233	0.291953	0.0162486	0.0200778	0.00958761	0	0.0207514	0.0214593	0.0130033	0.00545396	0.0198348	0.020192	0	0.0350996	0.0281057	0	0.0244321	0.065841	0.222645	0
ENSG00000253298	0.491	0.54	0	0	0	0	0	0	0.0170938	0	0.0219016	0	0	0	0	0	0.0109575	0.0261953	0	1.28414	0	0	0.013064	0	0.0676369	0	0	0	0.0141161	0.0110953	0	0.0430539	0	0.00604865	0	0.00981875	0.00812298	0	0	0.0150161	0.00545945	0	0	0.0177314	0.0181393	0.00770688	0	0.963173	0
ENSG00000267322	0.521	0.92	0.00884226	0.042448	0.244413	0.126442	0.0935011	0.0726889	0.159164	0.106443	0.32289	0.01874	0.196385	0.131744	0.40037	0.244355	0.170046	0.79271	0.187652	1.97067	0.0259693	0.0149437	0.0202736	0.323737	0.27553	0.104364	0.128187	0.0589328	0.120485	0.258277	0.335546	0.314981	0.162171	0.112641	0.108346	0.0990432	0.283631	0.420119	0.208248	0.308765	0.334658	0.0262725	0.452021	0.206376	0.0703745	0.143521	0.172664	5.93217	0.0912472
ENSG00000179082	0.654	1.15	0	0.0349977	0.114191	0.00744636	0.0578176	0.217249	0.0765497	0.0270031	0.224183	0.0231762	0.0202396	0.00905176	0.0532417	0.0366303	0.03505	0.139653	0.0618865	1.31444	0.0214113	0.00616041	0.292517	0.0370716	0.0649056	0.0061462	0.0325193	0.0680248	0.0451536	0.0922762	0.322761	0.0236088	0.0121552	0	0.074441	0.609305	0.0883429	0.0629784	0.0132074	0.0528357	0.0349266	0.0108306	0.304031	0.272246	0.0290113	0.0147913	0.0113887	0.866511	0
ENSG00000226101	0.682	1.78	0.0111139	0	0.0102401	0	0	0.0114204	0.0250068	0	0.149521	0	0.0154274	0.0137992	0.0162332	0.027921	0.0641197	0.0170318	0	0.0834929	0	0.00939141	0	0	0.0659648	0.00936975	0	0	0.0275343	0.032463	0.0781019	0.0899777	0	0.0117982	0	0	0.0396108	0.0120011	0	0	0	0	0.019935	0.233456	0	0.0150327	0	0.205485	0.0491525
ENSG00000268095	0.743	0.88	0.0395993	0.316833	0.145944	0.121341	0.26171	0.691753	0.0594002	0.146675	0	0.0209813	0.164905	0	0.231358	0.0497419	0	0.515824	0.112051	0.69414	0	0.0669239	0.226984	0.322184	0.0587588	0.0333848	0.132478	0.10557	0	0.154223	1.5862	0.0213729	0.132049	0.0210188	0.323478	0.341197	0.141135	0.342085	0.0717399	0.365262	0.83474	0.235318	0.0710293	0.184847	0.0945498	0.0535621	0.0309305	0.31378	0.23351
ENSG00000226383	0.999	1	0.0571485	0.420664	0.547617	0.093395	0.181292	0.610735	0.462913	0.0317515	0.702948	0.109007	2.4116	0.823096	0.400666	1.03372	1.9233	1.19983	0.0970254	3.23426	0.0503528	0	0	0.267356	0	0.472163	0.904959	1.09696	0.523858	0.578681	1.42168	1.61627	0.343024	0.370071	1.22544	0.374228	0.0325891	1.69088	0.134593	0.0225915	1.37442	0.186782	1.56324	1.89404	0.33658	0.0231898	0.366031	1.41889	0
[truncated: 453 more columns]
